# Supplementary material for: The weathering process of carbonatite: weathering time
Source: PeerJ. 2023 Jul 31;11:e15793. doi: 10.7717/peerj.15793 (PMC10399557; doi:10.7717/peerj.15793)
Supplement: Supplemental Information 1 [file peerj-11-15793-s001.xlsx]

## Sheet: Figure2
	two_theat	S333	S907	S910	S914	S917	S937	S938	S950	S666	S999
1	5	12.3177	22.3535	32.3952	42.3979	52.3952	62.3153	72.3466	82.365	92.3224	102.319
2	5.02	12.2771	22.3257	32.2978	42.3627	52.3613	62.3168	72.3271	82.3608	92.3494	102.328
3	5.04	12.2703	22.3011	32.3229	42.3672	52.3016	62.3111	72.3299	82.3158	92.3781	102.346
4	5.06	12.263	22.2896	32.329	42.3844	52.384	62.3457	72.3101	82.3704	92.3139	102.37
5	5.08	12.2916	22.2887	32.3549	42.3862	52.3581	62.3434	72.348	82.28	92.3503	102.33
6	5.1	12.2954	22.2963	32.3355	42.3659	52.328	62.365	72.2877	82.3257	92.3224	102.325
7	5.12	12.294	22.292	32.348	42.3257	52.2963	62.3406	72.3521	82.3572	92.3457	102.34
8	5.14	12.3092	22.2843	32.354	42.3322	52.3054	62.3049	72.3299	82.3595	92.3392	102.335
9	5.16	12.2959	22.3087	32.3429	42.3392	52.3663	62.3346	72.312	82.3158	92.3672	102.342
10	5.18	12.2843	22.2718	32.3691	42.3929	52.3294	62.2872	72.312	82.312	92.3668	102.293
11	5.2	12.2829	22.2482	32.3346	42.374	52.2901	62.3722	72.354	82.3355	92.3448	102.354
12	5.22	12.2218	22.3355	32.3313	42.3722	52.3163	62.3106	72.3215	82.3059	92.3373	102.348
13	5.24	12.2343	22.2868	32.3177	42.384	52.3406	62.3271	72.3392	82.2747	92.28	102.333
14	5.26	12.2383	22.3035	32.3489	42.3754	52.3177	62.2978	72.2776	82.2834	92.2954	102.305
15	5.28	12.2532	22.2954	32.3434	42.3768	52.329	62.3082	72.3327	82.3243	92.3576	102.334
16	5.3	12.2829	22.3101	32.4186	42.3106	52.3498	62.321	72.3475	82.3406	92.3257	102.362
17	5.32	12.2664	22.3087	32.3082	42.3322	52.3722	62.3006	72.3063	82.292	92.3322	102.313
18	5.34	12.3224	22.3247	32.3485	42.3087	52.3508	62.3186	72.3613	82.2935	92.3512	102.383
19	5.36	12.2595	22.3092	32.3704	42.3252	52.2887	62.2824	72.3134	82.2954	92.3563	102.301
20	5.38	12.2413	22.2978	32.321	42.3087	52.329	62.3172	72.3627	82.3373	92.3163	102.303
21	5.4	12.2722	22.2834	32.3631	42.3429	52.313	62.3006	72.3002	82.3087	92.348	102.312
22	5.42	12.3011	22.3106	32.3359	42.3252	52.3139	62.293	72.3387	82.2916	92.3299	102.325
23	5.44	12.2669	22.261	32.3494	42.32	52.2853	62.2944	72.3406	82.3097	92.3006	102.321
24	5.46	12.303	22.2679	32.3153	42.3494	52.3144	62.3804	72.3327	82.2863	92.328	102.32
25	5.48	12.2683	22.2605	32.2973	42.3006	52.3364	62.2877	72.3369	82.3191	92.3261	102.337
26	5.5	12.2591	22.3139	32.3576	42.2925	52.3082	62.3299	72.3025	82.2935	92.3082	102.314
27	5.52	12.2313	22.3369	32.3261	42.3498	52.3336	62.2853	72.2679	82.3271	92.3182	102.345
28	5.54	12.2537	22.2805	32.3383	42.3768	52.2911	62.2708	72.3517	82.2752	92.2839	102.303
29	5.56	12.2814	22.3186	32.3613	42.3494	52.2853	62.3233	72.3233	82.2949	92.3475	102.292
30	5.58	12.2492	22.2502	32.3261	42.3097	52.2944	62.3355	72.3082	82.2997	92.3415	102.31
31	5.6	12.2896	22.2795	32.2949	42.3299	52.2863	62.3049	72.3238	82.2973	92.329	102.294
32	5.62	12.2338	22.2882	32.3604	42.3101	52.3044	62.2698	72.2892	82.3011	92.3149	102.332
33	5.64	12.2635	22.2586	32.3285	42.2679	52.3101	62.312	72.2591	82.2829	92.3475	102.303
34	5.66	12.2541	22.2571	32.3503	42.3804	52.2781	62.2756	72.3134	82.3304	92.3149	102.33
35	5.68	12.2497	22.2954	32.2853	42.3092	52.312	62.3011	72.3276	82.2911	92.3252	102.327
36	5.7	12.2566	22.2086	32.2906	42.3438	52.3215	62.3308	72.321	82.3322	92.262	102.317
37	5.72	12.26	22.2512	32.2959	42.3224	52.281	62.3025	72.303	82.2819	92.2781	102.306
38	5.74	12.2839	22.28	32.3443	42.3346	52.2373	62.2497	72.2814	82.3006	92.3021	102.331
39	5.76	12.2278	22.2502	32.2863	42.3082	52.28	62.3139	72.3092	82.3101	92.2766	102.273
40	5.78	12.2507	22.2892	32.3182	42.3777	52.2718	62.2732	72.2649	82.2863	92.2679	102.28
41	5.8	12.2298	22.2537	32.2949	42.2722	52.2766	62.2532	72.2776	82.2824	92.3336	102.285
42	5.82	12.2223	22.263	32.3101	42.3082	52.2877	62.2863	72.3025	82.261	92.3196	102.297
43	5.84	12.2467	22.2896	32.2713	42.2887	52.2727	62.2635	72.2664	82.2863	92.3332	102.318
44	5.86	12.2263	22.2413	32.3163	42.3134	52.2877	62.2959	72.2693	82.2507	92.2911	102.268
45	5.88	12.2644	22.2983	32.3294	42.321	52.2428	62.2664	72.2968	82.2669	92.2556	102.298
46	5.9	12.2635	22.2213	32.3025	42.2819	52.2916	62.3078	72.2805	82.2208	92.2858	102.25
47	5.92	12.2532	22.2066	32.3257	42.3168	52.3313	62.3035	72.2887	82.3196	92.2586	102.312
48	5.94	12.2925	22.2688	32.2944	42.3016	52.3415	62.2688	72.3153	82.2776	92.3144	102.21
49	5.96	12.2502	22.2343	32.3082	42.2679	52.3073	62.2829	72.2492	82.2896	92.3153	102.289
50	5.98	12.1928	22.3106	32.3401	42.292	52.2674	62.3011	72.3355	82.2906	92.2693	102.291
51	6	12.2551	22.2664	32.2766	42.2814	52.2737	62.2901	72.2625	82.2308	92.2732	102.267
52	6.02	12.2343	22.2228	32.3158	42.2373	52.2333	62.3106	72.2916	82.2423	92.2644	102.305
53	6.04	12.2556	22.2848	32.3383	42.2901	52.2561	62.2428	72.2462	82.2683	92.2625	102.262
54	6.06	12.2268	22.2458	32.2978	42.3308	52.2973	62.3068	72.2868	82.3044	92.3049	102.282
55	6.08	12.2051	22.2805	32.3111	42.3285	52.2877	62.2992	72.3002	82.2605	92.281	102.316
56	6.1	12.1815	22.2418	32.2576	42.3125	52.2839	62.2819	72.3299	82.2418	92.3006	102.291
57	6.12	12.1943	22.2497	32.3125	42.3322	52.2987	62.263	72.2776	82.2863	92.3322	102.29
58	6.14	12.2127	22.264	32.2756	42.3182	52.26	62.2625	72.2863	82.2403	92.2863	102.261
59	6.16	12.2323	22.2438	32.3149	42.2925	52.328	62.2698	72.3373	82.2742	92.2785	102.294
60	6.18	12.2308	22.2268	32.2882	42.2766	52.2363	62.28	72.2892	82.2243	92.2814	102.282
61	6.2	12.2157	22.2467	32.2776	42.3205	52.2713	62.2747	72.2258	82.2795	92.2781	102.298
62	6.22	12.2566	22.2848	32.3535	42.2887	52.281	62.3097	72.2497	82.2781	92.2819	102.302
63	6.24	12.2097	22.1679	32.261	42.3364	52.328	62.2383	72.2358	82.2458	92.2863	102.291
64	6.26	12.1575	22.2015	32.2868	42.3294	52.2595	62.2443	72.2781	82.2781	92.261	102.296
65	6.28	12.2066	22.2482	32.2688	42.2882	52.292	62.2492	72.2502	82.2688	92.2556	102.337
66	6.3	12.2517	22.2318	32.2732	42.2843	52.2882	62.2581	72.263	82.2343	92.2683	102.246
67	6.32	12.2015	22.2591	32.3106	42.2492	52.2571	62.2605	72.2727	82.2403	92.2383	102.223
68	6.34	12.1902	22.2482	32.3322	42.3205	52.2433	62.2839	72.2328	82.2482	92.2819	102.268
69	6.36	12.1778	22.2248	32.2433	42.294	52.2674	62.2679	72.2482	82.262	92.2906	102.267
70	6.38	12.1773	22.2338	32.2987	42.3777	52.2532	62.2944	72.2448	82.2541	92.2795	102.248
71	6.4	12.2147	22.2081	32.3006	42.3073	52.2492	62.3294	72.3044	82.262	92.3125	102.283
72	6.42	12.2097	22.2472	32.2949	42.3224	52.2571	62.2829	72.2997	82.279	92.2448	102.236
73	6.44	12.2162	22.2253	32.3304	42.3318	52.2487	62.3063	72.2507	82.2659	92.2925	102.279
74	6.46	12.2036	22.2423	32.2944	42.3308	52.2586	62.2546	72.2911	82.2443	92.2887	102.295
75	6.48	12.2076	22.2283	32.2853	42.3572	52.2659	62.2949	72.2541	82.2882	92.2771	102.28
76	6.5	12.2132	22.2388	32.293	42.2892	52.2863	62.2718	72.2829	82.2517	92.2693	102.286
77	6.52	12.1799	22.2193	32.3097	42.2635	52.2968	62.2659	72.2795	82.2472	92.2551	102.274
78	6.54	12.2467	22.2273	32.3016	42.2649	52.264	62.2507	72.2293	82.2348	92.2556	102.277
79	6.56	12.2015	22.1949	32.3233	42.2795	52.3134	62.2586	72.2502	82.2413	92.28	102.285
80	6.58	12.1856	22.2117	32.2911	42.2868	52.2683	62.2551	72.3087	82.2683	92.2664	102.244
81	6.6	12.2218	22.2482	32.2674	42.2997	52.2303	62.281	72.2973	82.2253	92.2664	102.279
82	6.62	12.2097	22.1815	32.2843	42.3158	52.281	62.2581	72.2863	82.2688	92.2418	102.243
83	6.64	12.2313	22.2482	32.293	42.3092	52.2368	62.3191	72.2679	82.2477	92.2649	102.306
84	6.66	12.2462	22.2328	32.2935	42.2551	52.2571	62.2742	72.3327	82.2586	92.2679	102.278
85	6.68	12.2363	22.2906	32.263	42.2887	52.2591	62.2228	72.2556	82.2308	92.2853	102.291
86	6.7	12.1564	22.2448	32.2556	42.279	52.2393	62.2776	72.2313	82.2328	92.2423	102.234
87	6.72	12.2308	22.2243	32.26	42.2814	52.3087	62.2664	72.2863	82.2718	92.2824	102.224
88	6.74	12.1543	22.2393	32.2718	42.2868	52.2556	62.2303	72.292	82.2983	92.2423	102.288
89	6.76	12.1908	22.2253	32.2507	42.292	52.1969	62.2263	72.281	82.2333	92.2756	102.261
90	6.78	12.2056	22.2383	32.2649	42.2843	52.2443	62.2348	72.2541	82.2664	92.2771	102.282
91	6.8	12.1938	22.1706	32.2742	42.3475	52.1887	62.2698	72.2137	82.2368	92.2541	102.267
92	6.82	12.1928	22.2487	32.2268	42.3021	52.2173	62.2654	72.2458	82.2453	92.2512	102.244
93	6.84	12.1758	22.2318	32.2368	42.2843	52.2363	62.2497	72.279	82.2669	92.2674	102.261
94	6.86	12.2142	22.2137	32.2708	42.2581	52.2413	62.2635	72.2293	82.2298	92.2107	102.226
95	6.88	12.2228	22.2482	32.2737	42.293	52.2423	62.2458	72.2328	82.2443	92.3035	102.234
96	6.9	12.1933	22.2025	32.26	42.2654	52.2718	62.2795	72.2561	82.201	92.2997	102.254
97	6.92	12.1882	22.1674	32.312	42.3044	52.2834	62.26	72.262	82.2482	92.2737	102.32
98	6.94	12.2005	22.1933	32.2644	42.3035	52.2693	62.2198	72.2228	82.2507	92.2935	102.273
99	6.96	12.2283	22.2576	32.2635	42.3078	52.2472	62.2183	72.2848	82.2659	92.3049	102.276
100	6.98	12.1752	22.2183	32.2581	42.2438	52.2698	62.281	72.313	82.2273	92.2718	102.218
101	7	12.2273	22.2152	32.2703	42.2892	52.2373	62.2458	72.335	82.2288	92.2659	102.277
102	7.02	12.1954	22.1923	32.3191	42.2403	52.2293	62.2566	72.2882	82.2649	92.3229	102.304
103	7.04	12.1902	22.2056	32.2785	42.2546	52.1933	62.2408	72.2963	82.2556	92.2328	102.246
104	7.06	12.2046	22.2	32.2848	42.2408	52.2566	62.2497	72.2732	82.2258	92.2747	102.304
105	7.08	12.2403	22.1611	32.2863	42.2338	52.263	62.2683	72.2388	82.2418	92.2703	102.289
106	7.1	12.2223	22.2263	32.3006	42.2848	52.2649	62.2193	72.2659	82.2137	92.2718	102.293
107	7.12	12.1851	22.184	32.2408	42.2453	52.2722	62.1969	72.2698	82.2644	92.2383	102.261
108	7.14	12.1995	22.2107	32.3336	42.3016	52.2561	62.2383	72.2086	82.2333	92.2363	102.245
109	7.16	12.1825	22.2041	32.2388	42.2973	52.2142	62.2458	72.2358	82.2546	92.2713	102.267
110	7.18	12.2086	22.2025	32.312	42.2532	52.2188	62.1938	72.2752	82.2263	92.2911	102.225
111	7.2	12.201	22.1959	32.28	42.3266	52.2248	62.2586	72.2467	82.2756	92.2654	102.217
112	7.22	12.1559	22.2097	32.2333	42.2906	52.2173	62.2313	72.2507	82.2649	92.263	102.222
113	7.24	12.2046	22.2132	32.3111	42.2683	52.2438	62.2428	72.2944	82.279	92.2737	102.242
114	7.26	12.1789	22.2318	32.2829	42.2669	52.2453	62.2713	72.2771	82.2556	92.2546	102.281
115	7.28	12.2178	22.2363	32.2718	42.2713	52.2081	62.2467	72.2659	82.2674	92.2333	102.249
116	7.3	12.1538	22.2343	32.281	42.313	52.2517	62.2561	72.2071	82.2248	92.2438	102.259
117	7.32	12.2051	22.2076	32.2605	42.3059	52.2413	62.2398	72.2659	82.2443	92.2428	102.197
118	7.34	12.1918	22.2102	32.2925	42.312	52.2605	62.2467	72.2408	82.2571	92.3063	102.281
119	7.36	12.1442	22.2173	32.2654	42.3073	52.2117	62.2467	72.2373	82.2467	92.2752	102.273
120	7.38	12.1949	22.1969	32.2541	42.3233	52.2388	62.2378	72.2829	82.2353	92.281	102.263
121	7.4	12.1695	22.1979	32.28	42.2551	52.2625	62.2556	72.2561	82.1732	92.2644	102.224
122	7.42	12.2258	22.1913	32.3092	42.2595	52.1835	62.2537	72.2517	82.2137	92.2507	102.314
123	7.44	12.1432	22.1737	32.2911	42.304	52.2492	62.2462	72.2659	82.2178	92.2517	102.198
124	7.46	12.1984	22.2005	32.2877	42.2659	52.2343	62.2203	72.2541	82.2576	92.2742	102.281
125	7.48	12.1995	22.2	32.2978	42.2348	52.2293	62.2253	72.2203	82.2595	92.2472	102.2
126	7.5	12.1674	22.2178	32.3016	42.2477	52.2703	62.2152	72.2669	82.2343	92.2127	102.208
127	7.52	12.2066	22.2005	32.2674	42.3111	52.2949	62.2625	72.2644	82.2348	92.2263	102.303
128	7.54	12.1532	22.2208	32.2781	42.2843	52.1887	62.2213	72.261	82.2313	92.2477	102.266
129	7.56	12.1928	22.1969	32.2752	42.3006	52.2438	62.2066	72.2338	82.2472	92.2142	102.247
130	7.58	12.1815	22.2896	32.2408	42.3346	52.2263	62.2467	72.2423	82.2408	92.2348	102.217
131	7.6	12.2378	22.1706	32.2829	42.2403	52.2467	62.2183	72.2615	82.2378	92.2487	102.221
132	7.62	12.1421	22.2233	32.28	42.2298	52.2805	62.279	72.2766	82.2571	92.2492	102.261
133	7.64	12.1856	22.1648	32.2512	42.2954	52.2576	62.2443	72.2771	82.2973	92.2766	102.27
134	7.66	12.1737	22.2433	32.2318	42.3229	52.2551	62.2056	72.1825	82.2472	92.2605	102.224
135	7.68	12.2378	22.2198	32.2268	42.3097	52.2502	62.2363	72.2987	82.2097	92.1575	102.29
136	7.7	12.2081	22.2086	32.3044	42.3153	52.2462	62.2188	72.2303	82.261	92.2872	102.305
137	7.72	12.1784	22.203	32.2595	42.304	52.2188	62.2268	72.2323	82.1908	92.263	102.281
138	7.74	12.2283	22.2102	32.28	42.2911	52.2	62.2076	72.2228	82.2453	92.2586	102.221
139	7.76	12.1887	22.2233	32.2839	42.2423	52.1995	62.2408	72.1943	82.2353	92.262	102.215
140	7.78	12.1908	22.2318	32.2132	42.2771	52.2403	62.2097	72.2848	82.1871	92.2368	102.245
141	7.8	12.1742	22.2378	32.2487	42.304	52.2428	62.2208	72.2388	82.158	92.2413	102.242
142	7.82	12.1737	22.1964	32.2537	42.2805	52.2015	62.2213	72.2408	82.2273	92.2443	102.308
143	7.84	12.1664	22.1442	32.261	42.2766	52.2132	62.2102	72.2615	82.2308	92.2398	102.285
144	7.86	12.2258	22.184	32.2343	42.2353	52.2127	62.2333	72.2497	82.2428	92.26	102.22
145	7.88	12.2107	22.1794	32.2458	42.2625	52.1984	62.1897	72.2781	82.2248	92.2418	102.197
146	7.9	12.1923	22.2253	32.2358	42.2877	52.2091	62.2338	72.1799	82.1995	92.2393	102.199
147	7.92	12.1778	22.1638	32.2343	42.2834	52.2328	62.2228	72.2698	82.2041	92.2737	102.216
148	7.94	12.1856	22.1685	32.2512	42.2576	52.2066	62.2268	72.2313	82.2683	92.2497	102.222
149	7.96	12.1897	22.2036	32.2732	42.2713	52.2046	62.2041	72.2015	82.2323	92.2868	102.246
150	7.98	12.1495	22.1861	32.2328	42.2732	52.2091	62.1933	72.1959	82.2487	92.2595	102.244
151	8	12.1389	22.1758	32.2747	42.281	52.262	62.2363	72.2398	82.2258	92.2025	102.213
152	8.02	12.1553	22.2046	32.293	42.2649	52.1969	62.1995	72.2814	82.2323	92.2688	102.247
153	8.04	12.1553	22.1716	32.2727	42.2997	52.2117	62.2238	72.203	82.2273	92.2625	102.237
154	8.06	12.1368	22.2152	32.2263	42.2507	52.2091	62.2323	72.2112	82.2041	92.2644	102.232
155	8.08	12.1809	22.1622	32.2051	42.2901	52.2238	62.2824	72.2308	82.2566	92.2586	102.242
156	8.1	12.1627	22.1974	32.2693	42.2566	52.1809	62.2863	72.1882	82.2408	92.2551	102.22
157	8.12	12.132	22.2288	32.2477	42.3068	52.2512	62.2223	72.2571	82.2127	92.2605	102.232
158	8.14	12.1373	22.1357	32.2848	42.262	52.202	62.2502	72.2173	82.199	92.2576	102.199
159	8.16	12.1458	22.1575	32.2253	42.2944	52.2433	62.2482	72.2378	82.2041	92.2467	102.264
160	8.18	12.1506	22.1871	32.2328	42.2378	52.1897	62.2228	72.2448	82.1959	92.2502	102.215
161	8.2	12.1362	22.149	32.26	42.2858	52.2418	62.2423	72.2373	82.2408	92.2253	102.261
162	8.22	12.1747	22.1871	32.2097	42.2443	52.2081	62.2318	72.2086	82.2458	92.1742	102.273
163	8.24	12.1511	22.1897	32.2467	42.2318	52.1789	62.2318	72.1726	82.2243	92.2882	102.246
164	8.26	12.1622	22.2188	32.2318	42.2843	52.17	62.2167	72.2061	82.2462	92.2243	102.277
165	8.28	12.1125	22.1933	32.2238	42.2615	52.2076	62.2228	72.1897	82.2278	92.2722	102.209
166	8.3	12.1271	22.1527	32.2408	42.2732	52.2152	62.2482	72.1742	82.2448	92.2323	102.209
167	8.32	12.1559	22.2383	32.2378	42.2522	52.2458	62.2188	72.2132	82.2117	92.2398	102.268
168	8.34	12.0995	22.1638	32.2383	42.2795	52.2258	62.1758	72.2472	82.1984	92.2586	102.249
169	8.36	12.1115	22.1721	32.2814	42.2805	52.203	62.202	72.261	82.2142	92.2644	102.22
170	8.38	12.1384	22.1511	32.2223	42.261	52.2492	62.2398	72.2086	82.1877	92.2438	102.226
171	8.4	12.1389	22.1658	32.2218	42.2718	52.28	62.2056	72.2188	82.201	92.263	102.244
172	8.42	12.1706	22.1601	32.2551	42.262	52.1959	62.2208	72.201	82.1846	92.2268	102.198
173	8.44	12.1234	22.1877	32.2532	42.2901	52.2162	62.2127	72.1913	82.1742	92.2458	102.241
174	8.46	12.1136	22.1747	32.2398	42.2814	52.2041	62.1959	72.2438	82.2522	92.2071	102.211
175	8.48	12.1464	22.203	32.2157	42.3299	52.2208	62.2263	72.2213	82.1664	92.1928	102.228
176	8.5	12.1638	22.1959	32.2388	42.3224	52.2448	62.183	72.2313	82.2522	92.2328	102.22
177	8.52	12.1125	22.1638	32.2532	42.2756	52.1908	62.2178	72.1866	82.1897	92.2418	102.178
178	8.54	12.1314	22.182	32.2183	42.2423	52.1569	62.2127	72.2615	82.2268	92.2467	102.251
179	8.56	12.169	22.1325	32.2147	42.3002	52.2071	62.2167	72.2303	82.2167	92.2218	102.263
180	8.58	12.17	22.1464	32.2383	42.263	52.1742	62.1763	72.2183	82.141	92.2561	102.214
181	8.6	12.1201	22.1611	32.1969	42.312	52.1763	62.2576	72.2061	82.1773	92.1679	102.187
182	8.62	12.1087	22.1309	32.2571	42.28	52.2253	62.201	72.2132	82.2	92.2462	102.227
183	8.64	12.1255	22.119	32.1995	42.2877	52.1933	62.2198	72.2413	82.2193	92.2373	102.24
184	8.66	12.1711	22.1416	32.2541	42.2477	52.2127	62.1721	72.1747	82.1846	92.2223	102.208
185	8.68	12.1217	22.1426	32.2107	42.2532	52.1706	62.2005	72.1933	82.184	92.2343	102.181
186	8.7	12.1201	22.1044	32.2433	42.2795	52.2318	62.201	72.2005	82.2183	92.1918	102.206
187	8.72	12.1287	22.1752	32.1964	42.2868	52.1804	62.2428	72.133	82.2253	92.2041	102.237
188	8.74	12.1426	22.0896	32.2243	42.2713	52.2288	62.1809	72.1969	82.2041	92.2517	102.209
189	8.76	12.119	22.1044	32.2492	42.2829	52.2238	62.1421	72.2423	82.2398	92.2268	102.248
190	8.78	12.1421	22.1517	32.2	42.2313	52.1732	62.2036	72.2081	82.1527	92.1866	102.202
191	8.8	12.1405	22.2071	32.2373	42.2935	52.2061	62.2448	72.2025	82.1799	92.2615	102.22
192	8.82	12.1212	22.1093	32.2591	42.292	52.1804	62.1943	72.1569	82.1773	92.2066	102.198
193	8.84	12.1474	22.1394	32.2071	42.2313	52.1809	62.2147	72.1943	82.2152	92.202	102.22
194	8.86	12.1163	22.1244	32.2487	42.2443	52.1974	62.184	72.202	82.2173	92.2467	102.213
195	8.88	12.1527	22.0995	32.2458	42.2882	52.1866	62.1938	72.1784	82.2288	92.2448	102.213
196	8.9	12.1384	22.1426	32.2428	42.28	52.2203	62.2173	72.2076	82.1648	92.1877	102.218
197	8.92	12.0901	22.1201	32.2625	42.3172	52.1949	62.203	72.1851	82.2308	92.1902	102.234
198	8.94	12.1098	22.0945	32.1752	42.2992	52.2198	62.1908	72.2408	82.2066	92.1949	102.186
199	8.96	12.1255	22.1357	32.2343	42.2987	52.1763	62.1606	72.2046	82.2248	92.1871	102.237
200	8.98	12.0774	22.1405	32.2625	42.2959	52.1959	62.1928	72.2218	82.1897	92.1732	102.255
201	9	12.1071	22.183	32.2659	42.312	52.2036	62.1984	72.2147	82.2428	92.201	102.223
202	9.02	12.0628	22.0978	32.2005	42.3406	52.1617	62.1706	72.1442	82.1897	92.1809	102.213
203	9.04	12.0712	22.1501	32.2081	42.3182	52.1596	62.2502	72.201	82.1887	92.2393	102.221
204	9.06	12.0589	22.1163	32.2328	42.401	52.1851	62.1913	72.2218	82.2323	92.2258	102.224
205	9.08	12.1522	22.1	32.2644	42.3327	52.1726	62.2323	72.1585	82.2091	92.1908	102.208
206	9.1	12.1131	22.0851	32.2561	42.3996	52.1877	62.1933	72.1984	82.1995	92.2433	102.202
207	9.12	12.0885	22.118	32.2659	42.3224	52.1711	62.1601	72.201	82.1815	92.2428	102.245
208	9.14	12.0757	22.1033	32.3196	42.2944	52.2	62.202	72.2368	82.1959	92.1773	102.209
209	9.16	12.1501	22.1125	32.2482	42.2561	52.1815	62.2	72.203	82.2142	92.2198	102.236
210	9.18	12.1394	22.1006	32.2368	42.2173	52.1711	62.2443	72.2061	82.202	92.2091	102.209
211	9.2	12.0763	22.1421	32.2132	42.2843	52.1585	62.2157	72.2112	82.184	92.2423	102.18
212	9.22	12.0934	22.1711	32.2348	42.2992	52.1871	62.1685	72.2318	82.1742	92.2398	102.226
213	9.24	12.0912	22.0945	32.2288	42.2433	52.1835	62.1564	72.201	82.1773	92.2644	102.196
214	9.26	12.1109	22.1055	32.2566	42.2238	52.1851	62.1851	72.2443	82.203	92.2512	102.214
215	9.28	12.0835	22.0628	32.2193	42.2097	52.1437	62.2353	72.1928	82.1448	92.2248	102.187
216	9.3	12.0874	22.1217	32.2313	42.1861	52.1763	62.17	72.1789	82.1799	92.2056	102.241
217	9.32	12.0628	22.1416	32.2343	42.2378	52.1747	62.1648	72.1846	82.1658	92.2298	102.22
218	9.34	12.0729	22.1011	32.2467	42.2413	52.1861	62.2081	72.1726	82.1389	92.17	102.247
219	9.36	12.1142	22.1142	32.2218	42.2403	52.1897	62.1804	72.1897	82.133	92.1742	102.184
220	9.38	12.0846	22.0481	32.2198	42.2546	52.1815	62.1721	72.1918	82.1585	92.1933	102.235
221	9.4	12.0634	22.0595	32.2433	42.2005	52.2066	62.199	72.1527	82.1559	92.199	102.209
222	9.42	12.0595	22.0763	32.2253	42.2248	52.1995	62.1979	72.1949	82.149	92.182	102.207
223	9.44	12.1244	22.0802	32.2056	42.2358	52.1564	62.1527	72.2183	82.1564	92.2258	102.139
224	9.46	12.0634	22.06	32.2203	42.26	52.1538	62.1913	72.1448	82.1405	92.1773	102.226
225	9.48	12.0802	22.0628	32.2152	42.2537	52.1	62.1835	72.1752	82.1902	92.1995	102.23
226	9.5	12.0038	22.0718	32.2112	42.2433	52.1532	62.14	72.1887	82.1217	92.1742	102.197
227	9.52	12.0923	22.0785	32.184	42.2238	52.1548	62.1622	72.1658	82.1559	92.2097	102.205
228	9.54	12.0751	22.0407	32.1846	42.2353	52.1564	62.1125	72.1464	82.1532	92.1632	102.206
229	9.56	12.0189	22.1006	32.183	42.2112	52.1721	62.1559	72.1548	82.1664	92.2056	102.205
230	9.58	12.039	22.0729	32.183	42.1732	52.1596	62.2127	72.1564	82.132	92.1674	102.164
231	9.6	12.0874	22.0929	32.2537	42.1721	52.1674	62.1638	72.1336	82.1314	92.2066	102.177
232	9.62	12.0166	22.0923	32.2288	42.2273	52.1569	62.1622	72.1617	82.1778	92.1902	102.201
233	9.64	12.0345	22.0515	32.2107	42.199	52.2248	62.1261	72.149	82.1174	92.1669	102.194
234	9.66	12.0345	22.0589	32.1706	42.2586	52.132	62.1653	72.1298	82.1405	92.1421	102.165
235	9.68	12.0419	22.0538	32.2015	42.2253	52.1553	62.1511	72.1234	82.1737	92.2137	102.155
236	9.7	12.0316	22.0956	32.203	42.2487	52.0896	62.1643	72.1027	82.1207	92.1758	102.185
237	9.72	12.0735	22.094	32.2218	42.1964	52.0962	62.169	72.1027	82.1421	92.2253	102.202
238	9.74	12.0172	22.0829	32.1564	42.2368	52.0984	62.1389	72.1352	82.1011	92.1773	102.168
239	9.76	11.9955	22.0527	32.2	42.2046	52.1426	62.125	72.1846	82.1341	92.2041	102.195
240	9.78	12.0595	22.0287	32.2061	42.1897	52.1261	62.1437	72.1585	82.1448	92.2243	102.155
241	9.8	12.0595	22.0521	32.1959	42.2117	52.1287	62.1695	72.1918	82.0595	92.1228	102.151
242	9.82	12.043	22.0595	32.1974	42.2208	52.1527	62.1575	72.132	82.0868	92.1964	102.162
243	9.84	12.0241	22.0724	32.1706	42.2223	52.1648	62.1685	72.1664	82.1104	92.183	102.203
244	9.86	11.989	22.0807	32.1882	42.2263	52.1394	62.1658	72.1716	82.14	92.1794	102.19
245	9.88	11.992	22.0436	32.1794	42.17	52.1153	62.1212	72.1569	82.1228	92.1426	102.191
246	9.9	12.0032	22.0442	32.1747	42.1933	52.141	62.1298	72.14	82.1416	92.1596	102.164
247	9.92	12.0595	22.0572	32.1974	42.1825	52.1066	62.1049	72.1674	82.1548	92.2107	102.185
248	9.94	11.9961	22.0402	32.2086	42.1695	52.1185	62.133	72.1543	82.0973	92.1653	102.157
249	9.96	11.967	22.0402	32.1674	42.2097	52.1136	62.14	72.1835	82.1011	92.1711	102.158
250	9.98	11.9837	22.0154	32.1617	42.1856	52.0874	62.1309	72.1892	82.0583	92.1282	102.173
251	10	12.0119	21.9932	32.1448	42.1606	52.0967	62.1153	72.1169	82.1044	92.1882	102.153
252	10.02	12.0183	22.0578	32.1742	42.1611	52.1082	62.1158	72.1163	82.1737	92.158	102.15
253	10.04	11.9807	22.0177	32.1732	42.1763	52.2046	62.2036	72.112	82.1346	92.1511	102.119
254	10.06	12.0195	22.0067	32.1804	42.2512	52.1271	62.0701	72.1432	82.1261	92.14	102.128
255	10.08	11.9573	22.0183	32.1882	42.1908	52.1532	62.1207	72.1421	82.1495	92.1648	102.186
256	10.1	12.0002	21.9706	32.1469	42.2213	52.1027	62.1239	72.1464	82.1527	92.2005	102.165
257	10.12	11.989	21.9861	32.1617	42.1737	52.0896	62.1721	72.133	82.1362	92.1794	102.15
258	10.14	12.0322	22.0154	32.1959	42.1846	52.1087	62.0885	72.0984	82.0978	92.1856	102.231
259	10.16	11.976	21.9855	32.2233	42.184	52.1136	62.1109	72.0578	82.1389	92.1136	102.186
260	10.18	11.9688	21.9973	32.1706	42.1716	52.0668	62.0774	72.1511	82.0578	92.169	102.129
261	10.2	12.0154	22.031	32.1648	42.184	52.1522	62.0984	72.1378	82.0984	92.1293	102.135
262	10.22	11.9766	22.027	32.1954	42.141	52.1066	62.1212	72.1239	82.1066	92.1357	102.128
263	10.24	11.9724	22.0102	32.1835	42.1643	52.0929	62.1049	72.133	82.1104	92.1405	102.165
264	10.26	11.9598	22.0078	32.1153	42.1469	52.1077	62.0829	72.1066	82.0901	92.1532	102.16
265	10.28	11.9237	21.9586	32.1442	42.1794	52.0779	62.079	72.0829	82.0645	92.112	102.157
266	10.3	11.9409	21.9694	32.1804	42.1109	52.084	62.1125	72.1136	82.0724	92.1362	102.117
267	10.32	11.9415	21.933	32.1125	42.1234	52.0735	62.1033	72.1495	82.0453	92.1378	102.096
268	10.34	11.9932	21.9598	32.1287	42.1726	52.0912	62.1261	72.1185	82.1006	92.1196	102.153
269	10.36	11.9519	21.9996	32.1255	42.1261	52.0712	62.1384	72.1136	82.0679	92.1432	102.094
270	10.38	11.9421	21.9187	32.1228	42.1185	52.0901	62.0824	72.0673	82.0645	92.1341	102.136
271	10.4	11.9274	21.9561	32.169	42.1082	52.0785	62.1217	72.125	82.0166	92.1352	102.143
272	10.42	11.9169	22.0172	32.1325	42.1287	52.0367	62.132	72.0973	82.0651	92.0885	102.092
273	10.44	11.92	21.9458	32.1244	42.1658	52.0934	62.0729	72.0504	82.0258	92.1378	102.1
274	10.46	11.9531	21.9914	32.0879	42.1653	52.0707	62.1077	72.0956	82.0504	92.1255	102.127
275	10.48	11.964	21.9555	32.132	42.1448	52.0673	62.0595	72.0617	82.0419	92.1585	102.098
276	10.5	11.9231	21.9385	32.1378	42.1448	52.0785	62.0862	72.0774	82.0555	92.0956	102.117
277	10.52	11.9113	21.9187	32.1352	42.1809	52.0879	62.0945	72.0527	82.064	92.0995	102.08
278	10.54	11.9403	21.9458	32.1389	42.1309	52.0768	62.0481	71.9789	82.0679	92.0476	102.099
279	10.56	11.9212	21.9652	32.1093	42.1033	52.0824	62.0951	72.0504	82.0504	92.106	102.166
280	10.58	11.872	21.9879	32.0763	42.1261	52.0504	62.0521	72.0481	82.0304	92.1049	102.151
281	10.6	11.8918	21.9555	32.1136	42.1255	51.9932	62.0402	72.0934	81.9884	92.0724	102.119
282	10.62	11.9476	21.967	32.1239	42.1448	52.0561	62.0807	72.158	82.0447	92.1082	102.128
283	10.64	11.9549	21.9038	32.1287	42.1336	52.0532	62.0796	72.0862	82.0425	92.0923	102.087
284	10.66	11.9212	21.9262	32.06	42.1325	52.0043	62.0385	72.1131	82.0718	92.0807	102.085
285	10.68	11.8854	21.9231	32.0774	42.1627	52.0572	62.0379	72.069	82.0402	92.0595	102.108
286	10.7	11.964	21.9434	32.0425	42.1131	52.0166	62.0967	72.0253	82.0322	92.0896	102.103
287	10.72	11.8975	21.9573	32.0481	42.1632	52.0718	62.0662	72.1	82.0241	92.1022	102.055
288	10.74	11.874	21.9592	32.0874	42.1669	52.0774	62.0857	72.1	81.9831	92.0995	102.083
289	10.76	11.905	21.9012	32.0555	42.1071	52.0183	62.0578	72.0544	81.973	92.0835	102.104
290	10.78	11.8918	21.9567	32.1142	42.1271	52.0148	62.035	72.0195	82.0617	92.0611	102.099
291	10.8	11.8611	21.9144	32.1658	42.1196	52.0345	62.0367	72.0504	81.9979	92.0583	102.105
292	10.82	11.831	21.9549	32.0923	42.0623	52.0763	61.9955	72.002	82.0345	92.0566	102.063
293	10.84	11.8778	21.9081	32.0538	42.0515	52.0611	62.0707	72.0527	81.9676	92.0785	102.049
294	10.86	11.9452	21.9825	32.0724	42.118	52.0656	62.0459	71.9967	82.0583	92.0583	102.028
295	10.88	11.8752	21.8848	32.1082	42.0951	52.0287	62.0413	72.0425	82.0402	92.0623	102.076
296	10.9	11.9187	21.9194	32.1087	42.0978	51.9724	62.0183	72.0487	81.9476	92.074	102.013
297	10.92	11.8624	21.8527	32.1158	42.1136	52.0195	62.0662	71.9837	81.9342	92.0768	102.101
298	10.94	11.8924	21.8643	32.0851	42.0724	52.0258	62.0453	72.0061	82.002	92.0595	102.101
299	10.96	11.8829	21.9	32.0572	42.079	52.0453	61.9813	72.0595	82.0356	92.0453	102.115
300	10.98	11.9031	21.9561	32.0857	42.0846	51.992	62.0183	72.0589	82.0459	92.0779	102.035
301	11	11.8867	21.9025	32.0316	42.0679	52.0189	62.0555	72.0183	81.9855	92.0956	102.053
302	11.02	11.9	21.9094	32.1125	42.0751	52.0327	62.0316	72.0419	81.9712	92.0229	102.058
303	11.04	11.8937	21.8835	32.1	42.0956	51.9567	62.0201	72.0293	82.0253	92.0362	102.066
304	11.06	11.854	21.8994	32.0515	42.0824	51.9861	62.0201	72.002	81.9664	92.0258	102.087
305	11.08	11.831	21.8662	32.0701	42.1022	51.9397	61.9537	72.0177	81.9754	92.0757	102.036
306	11.1	11.8357	21.8829	32.0802	42.0544	51.9884	61.933	71.9855	82.0131	92.0333	102.035
307	11.12	11.8211	21.9	32.0166	42.0951	52.0333	61.9748	72.0532	81.9348	92.0668	102.054
308	11.14	11.8533	21.872	32.0696	42.1115	51.973	61.9748	71.9979	81.9658	92.0119	102.056
309	11.16	11.8759	21.8918	32.0901	42.1006	52.0032	62.0589	71.9979	81.9409	91.9944	102.114
310	11.18	11.7909	21.8701	32.06	42.0729	52.0276	62.0628	72.0212	81.9476	92.0453	102.074
311	11.2	11.8165	21.831	32.0333	42.1485	51.9926	61.9849	71.9867	81.9549	91.9961	102.014
312	11.22	11.8662	21.8579	32.0645	42.0679	51.9896	62.0049	72.0583	81.973	92.0555	102.041
313	11.24	11.8218	21.8784	32.0984	42.0729	51.9884	61.9926	72.0276	81.9837	92.1022	102.049
314	11.26	11.8138	21.8376	32.0385	42.0561	51.9664	62.0043	71.9932	82.0078	92.0751	102.048
315	11.28	11.7807	21.852	32.0868	42.0807	52.0043	61.9573	71.9837	81.9501	91.9688	102.029
316	11.3	11.7895	21.8494	32.0544	42.0498	51.9567	61.9873	72.0172	81.9592	92.0096	102.015
317	11.32	11.8158	21.8244	32.0527	42.0264	51.9766	62.0183	71.9784	82.0102	92.0189	102.039
318	11.34	11.8171	21.8231	32.0356	42.079	51.9138	62.0662	72.0177	81.9843	92.0102	101.991
319	11.36	11.7827	21.8585	32.0189	42.0402	51.9843	62.002	71.9879	81.9831	91.9807	102.024
320	11.38	11.8111	21.8224	32.0078	42.0084	51.9694	62.0241	71.9664	81.9434	92.0333	102.06
321	11.4	11.8488	21.8284	32.0623	41.9855	51.9519	61.947	71.9772	81.9006	91.9955	101.96
322	11.42	11.7909	21.8024	32.0995	42.0247	51.9849	61.9567	71.9543	81.9144	92.0253	101.959
323	11.44	11.8031	21.8829	31.9879	42.0119	52.0154	61.9243	72.0026	81.928	92.0201	102.025
324	11.46	11.7704	21.854	31.9884	42.0218	51.9712	61.9598	71.9879	81.9397	91.9549	102.007
325	11.48	11.8051	21.831	32.0061	42.0061	51.9748	61.9724	71.964	81.9144	92.0108	102.031
326	11.5	11.8037	21.801	32.0154	42.0281	51.9397	61.9973	71.9694	81.9537	92.0235	101.997
327	11.52	11.7929	21.8004	32.0425	42.0287	51.9507	61.9772	71.9501	81.9019	92.0802	102.008
328	11.54	11.7461	21.8304	32.0002	42.0258	51.961	62.0084	71.9664	81.9543	92.0442	102.006
329	11.56	11.8357	21.8084	32.0096	41.989	51.9156	61.9348	71.9784	81.8912	91.9961	102.034
330	11.58	11.7936	21.7997	31.9944	41.9819	51.9718	61.9628	71.9428	81.9664	92.0038	102.045
331	11.6	11.7779	21.7635	32.0038	42.0327	51.9421	61.9131	71.9446	81.9144	91.9789	101.975
332	11.62	11.769	21.8004	32.0281	42.0583	51.973	61.9561	71.9434	81.8572	91.9682	101.977
333	11.64	11.7697	21.8017	32.0014	42.0696	51.8527	61.9231	71.9592	81.881	91.9305	101.913
334	11.66	11.7341	21.7614	32.0241	42.0137	51.9766	61.9286	71.9373	81.9348	91.9879	101.957
335	11.68	11.8124	21.7814	32.0751	42.0195	51.9403	61.9549	71.9561	81.8695	91.9985	101.959
336	11.7	11.7475	21.7725	32.0206	41.9932	51.9156	61.9549	71.9373	81.9385	91.9694	101.99
337	11.72	11.7412	21.8204	31.9688	42.0402	51.9482	61.9379	71.9446	81.9249	91.976	101.923
338	11.74	11.7773	21.7861	31.9286	41.9879	51.9156	61.9646	71.9501	81.8968	91.944	101.953
339	11.76	11.7185	21.8317	32.0224	42.0038	51.9501	61.9274	71.9489	81.9113	91.9819	101.975
340	11.78	11.6795	21.8191	31.9772	42.0367	51.8987	61.9742	71.9421	81.9069	91.9495	102.018
341	11.8	11.7482	21.7711	31.9748	42.0026	51.9249	61.9268	71.9218	81.9212	91.9249	101.974
342	11.82	11.7299	21.7676	32.0362	41.9896	51.936	61.9549	71.9138	81.8559	91.9286	101.964
343	11.84	11.7579	21.8084	31.9688	42.027	51.9385	61.9397	71.9403	81.9194	91.9664	101.945
344	11.86	11.7099	21.7496	31.9742	41.9825	51.8803	61.9081	71.9616	81.9044	91.9778	101.891
345	11.88	11.7285	21.8104	31.9464	41.973	51.8924	61.9373	71.9305	81.9286	91.9495	101.924
346	11.9	11.7114	21.8357	31.9813	41.9861	51.8598	61.9063	71.9507	81.9119	91.9094	101.999
347	11.92	11.6904	21.7827	32.0183	41.9914	51.8905	61.976	71.9006	81.8198	91.9531	101.939
348	11.94	11.6991	21.7875	32.0137	42.0014	51.9069	61.9274	71.915	81.8579	91.9446	101.948
349	11.96	11.697	21.8688	32.0108	41.9861	51.893	61.9299	71.9342	81.8514	91.9434	101.937
350	11.98	11.7454	21.7909	31.9507	41.9446	51.8778	61.9138	71.9069	81.9156	91.9446	101.93
351	12	11.7271	21.7496	32.0333	41.9938	51.9088	61.9169	71.9409	81.8746	91.9397	101.922
352	12.02	11.7447	21.7766	31.9896	41.9688	51.8912	61.9286	71.8943	81.8682	91.9537	101.975
353	12.04	11.744	21.76	31.9507	41.9676	51.8688	61.915	71.92	81.865	91.9616	101.911
354	12.06	11.7327	21.8198	32.0049	41.9772	51.9056	61.9256	71.8886	81.8669	91.9682	101.959
355	12.08	11.7356	21.7419	31.9531	41.9949	51.8422	61.8899	71.8501	81.8324	91.9156	102.01
356	12.1	11.6499	21.7766	31.9567	41.9634	51.8918	61.9194	71.8389	81.8949	91.9088	101.917
357	12.12	11.6861	21.7454	31.9616	42.0043	51.8442	61.8765	71.8803	81.8546	91.9379	101.934
358	12.14	11.6348	21.7454	31.97	41.9604	51.8981	61.8442	71.8854	81.8727	91.9525	101.92
359	12.16	11.6743	21.7855	31.9598	41.9855	51.881	61.9056	71.8905	81.8912	91.9464	101.93
360	12.18	11.6824	21.7738	31.9169	41.9342	51.8746	61.8733	71.9175	81.8727	91.9421	101.942
361	12.2	11.6692	21.7192	31.944	41.9409	51.8669	61.8376	71.8918	81.8184	91.872	101.951
362	12.22	11.7192	21.7142	31.9113	41.9323	51.8682	61.8797	71.8291	81.7895	91.9604	101.96
363	12.24	11.6219	21.6721	31.964	41.9452	51.8759	61.8474	71.8591	81.8124	91.9579	101.924
364	12.26	11.6431	21.7902	31.9031	41.893	51.8566	61.8546	71.9299	81.8611	91.9293	101.882
365	12.28	11.6303	21.7475	31.9031	41.9879	51.833	61.8383	71.8867	81.837	91.905	101.889
366	12.3	11.7049	21.7635	31.9299	41.8994	51.8514	61.8585	71.8854	81.8591	91.9175	101.972
367	12.32	11.6743	21.6875	31.8867	41.9634	51.8784	61.854	71.8784	81.8383	91.9088	101.882
368	12.34	11.6566	21.6919	31.8701	41.9268	51.8708	61.8579	71.9323	81.833	91.9579	101.902
369	12.36	11.6439	21.7185	31.9131	41.8873	51.9106	61.7889	71.8435	81.8675	91.8797	101.905
370	12.38	11.6378	21.7121	31.8585	41.8886	51.8488	61.8376	71.8861	81.8118	91.9025	101.913
371	12.4	11.6551	21.6846	31.9113	41.9458	51.801	61.8468	71.8829	81.7956	91.9131	101.902
372	12.42	11.6476	21.6684	31.9391	41.9317	51.7669	61.854	71.8637	81.8158	91.9012	101.866
373	12.44	11.6581	21.7855	31.8772	41.9113	51.8337	61.8591	71.8071	81.7963	91.9025	101.936
374	12.46	11.678	21.7135	31.9012	41.9138	51.8304	61.8277	71.8204	81.8031	91.9323	101.882
375	12.48	11.667	21.6919	31.8981	41.947	51.8727	61.8778	71.8231	81.8291	91.9403	101.919
376	12.5	11.6318	21.6325	31.9006	41.9311	51.8585	61.8553	71.9409	81.7786	91.881	101.908
377	12.52	11.6469	21.7642	31.9169	41.9579	51.7676	61.801	71.8494	81.8098	91.8772	101.889
378	12.54	11.5595	21.7697	31.8873	41.9458	51.8071	61.831	71.8337	81.797	91.8886	101.838
379	12.56	11.5499	21.7092	31.936	41.9543	51.8579	61.7895	71.8291	81.7943	91.8886	101.863
380	12.58	11.6227	21.6662	31.9305	41.9579	51.8688	61.8264	71.8835	81.8037	91.8317	101.809
381	12.6	11.5934	21.6714	31.9131	41.9336	51.8566	61.8191	71.881	81.8078	91.8886	101.889
382	12.62	11.6416	21.7482	31.9094	41.9652	51.797	61.8171	71.893	81.797	91.8899	101.836
383	12.64	11.6363	21.664	31.9664	41.9206	51.8124	61.8064	71.8949	81.8104	91.8357	101.848
384	12.66	11.6127	21.7579	31.8854	41.9831	51.8803	61.833	71.9125	81.7249	91.8772	101.904
385	12.68	11.5459	21.6831	31.9311	42.0055	51.833	61.8501	71.8981	81.7745	91.8624	101.869
386	12.7	11.6211	21.6999	31.8772	42.0846	51.8004	61.8111	71.9212	81.7398	91.8675	101.881
387	12.72	11.5942	21.7006	31.8598	42.0628	51.8184	61.7683	71.8656	81.7766	91.8675	101.903
388	12.74	11.6119	21.7377	31.9336	41.9766	51.8098	61.7963	71.8468	81.7704	91.8778	101.943
389	12.76	11.5371	21.6677	31.8943	41.9081	51.7983	61.799	71.8448	81.8031	91.8559	101.884
390	12.78	11.5801	21.7006	31.893	41.881	51.8488	61.8191	71.852	81.7642	91.8191	101.883
391	12.8	11.5957	21.6484	31.9044	41.9212	51.8337	61.8111	71.7868	81.7649	91.7861	101.889
392	12.82	11.5879	21.6581	31.8949	41.8317	51.8662	61.799	71.8905	81.7676	91.8271	101.836
393	12.84	11.5427	21.6439	31.9056	41.8442	51.7963	61.8131	71.7929	81.7882	91.8494	101.894
394	12.86	11.605	21.6393	31.8778	41.837	51.7902	61.8098	71.8546	81.7586	91.835	101.805
395	12.88	11.5354	21.6408	31.8442	41.8994	51.795	61.7349	71.8277	81.8044	91.8091	101.832
396	12.9	11.6027	21.5934	31.9031	41.8396	51.801	61.7731	71.7566	81.7786	91.8151	101.798
397	12.92	11.5587	21.7035	31.8238	41.8488	51.7405	61.7164	71.7718	81.7257	91.7731	101.893
398	12.94	11.5322	21.6692	31.8669	41.893	51.8057	61.7711	71.8037	81.7482	91.8124	101.826
399	12.96	11.4666	21.6558	31.8317	41.8861	51.7882	61.8258	71.8084	81.8064	91.8778	101.851
400	12.98	11.5683	21.6012	31.8111	41.8297	51.7773	61.7334	71.7882	81.78	91.8098	101.842
401	13	11.5483	21.697	31.8004	41.7943	51.7834	61.7936	71.7841	81.7327	91.7841	101.811
402	13.02	11.5346	21.6514	31.8284	41.8422	51.7496	61.7997	71.7489	81.7766	91.7983	101.862
403	13.04	11.5714	21.6142	31.7861	41.8238	51.8343	61.7642	71.8091	81.7114	91.7669	101.829
404	13.06	11.5619	21.6318	31.8158	41.8842	51.8084	61.7447	71.8017	81.7278	91.7786	101.86
405	13.08	11.5667	21.6371	31.8084	41.8317	51.7902	61.7697	71.7929	81.7071	91.8238	101.846
406	13.1	11.5085	21.6603	31.8231	41.7889	51.8064	61.7731	71.7956	81.7214	91.8017	101.783
407	13.12	11.5126	21.6272	31.8071	41.8662	51.769	61.7334	71.7398	81.7363	91.837	101.798
408	13.14	11.5126	21.6165	31.8566	41.8422	51.7669	61.7185	71.7786	81.7192	91.751	101.825
409	13.16	11.5322	21.5777	31.8416	41.8688	51.7327	61.7214	71.7943	81.7649	91.8297	101.797
410	13.18	11.5451	21.533	31.7766	41.8604	51.7228	61.7306	71.7793	81.6962	91.8004	101.842
411	13.2	11.5595	21.5587	31.8204	41.8158	51.7855	61.7426	71.7676	81.7405	91.7468	101.856
412	13.22	11.5475	21.5856	31.8264	41.8238	51.7861	61.732	71.7697	81.7078	91.7656	101.834
413	13.24	11.4435	21.6204	31.833	41.8357	51.732	61.7579	71.7814	81.7363	91.8224	101.801
414	13.26	11.4902	21.615	31.8291	41.8363	51.689	61.7092	71.7868	81.7071	91.7963	101.804
415	13.28	11.5483	21.6112	31.8004	41.8304	51.7356	61.7192	71.8104	81.7545	91.7861	101.74
416	13.3	11.4094	21.5911	31.782	41.8422	51.7292	61.7461	71.7731	81.6868	91.7834	101.817
417	13.32	11.4952	21.5467	31.7573	41.7621	51.7628	61.732	71.7793	81.6897	91.7929	101.814
418	13.34	11.4191	21.5817	31.7725	41.7929	51.7178	61.7085	71.7983	81.6692	91.7814	101.831
419	13.36	11.4322	21.5738	31.7841	41.7963	51.7496	61.715	71.6802	81.7559	91.7909	101.795
420	13.38	11.5265	21.5643	31.8071	41.8044	51.799	61.6573	71.7586	81.6875	91.7779	101.835
421	13.4	11.5191	21.5579	31.7759	41.8598	51.7841	61.7292	71.7725	81.6991	91.8057	101.826
422	13.42	11.4793	21.5475	31.7889	41.7895	51.78	61.7454	71.7349	81.7356	91.782	101.77
423	13.44	11.5403	21.5611	31.8244	41.7841	51.737	61.7475	71.6941	81.7128	91.744	101.731
424	13.46	11.4657	21.5232	31.7807	41.8084	51.715	61.7278	71.7306	81.7228	91.7579	101.77
425	13.48	11.4278	21.605	31.7635	41.8098	51.6817	61.6999	71.7313	81.7313	91.7656	101.744
426	13.5	11.481	21.5635	31.7936	41.7807	51.6912	61.6566	71.7242	81.7056	91.7718	101.808
427	13.52	11.4843	21.5298	31.7579	41.7475	51.7356	61.7214	71.7475	81.678	91.7531	101.837
428	13.54	11.4546	21.6066	31.7766	41.7676	51.7412	61.7006	71.7006	81.6272	91.7482	101.775
429	13.56	11.4818	21.5887	31.7398	41.7902	51.8017	61.6846	71.7249	81.6633	91.7447	101.738
430	13.58	11.4632	21.5281	31.7704	41.7725	51.6543	61.7503	71.7327	81.6824	91.6499	101.763
431	13.6	11.4243	21.5981	31.7419	41.782	51.7447	61.6955	71.6846	81.6257	91.7943	101.796
432	13.62	11.4486	21.5539	31.76	41.7827	51.6919	61.7114	71.8158	81.6926	91.801	101.746
433	13.64	11.4623	21.5322	31.7178	41.7704	51.715	61.6699	71.7363	81.7006	91.7909	101.717
434	13.66	11.3996	21.5579	31.78	41.8165	51.6558	61.667	71.6802	81.6912	91.7517	101.777
435	13.68	11.3498	21.5651	31.7683	41.7983	51.732	61.6773	71.7503	81.6265	91.7827	101.748
436	13.7	11.4226	21.5579	31.7433	41.78	51.6933	61.689	71.7192	81.6491	91.7178	101.731
437	13.72	11.4478	21.5216	31.7538	41.8004	51.6897	61.6506	71.7614	81.6431	91.7228	101.687
438	13.74	11.4615	21.5539	31.7489	41.7669	51.7135	61.6677	71.7683	81.6165	91.6751	101.714
439	13.76	11.3943	21.5371	31.7786	41.7697	51.6751	61.6566	71.7503	81.6581	91.7503	101.754
440	13.78	11.3979	21.5579	31.7278	41.7207	51.7164	61.6543	71.6692	81.6558	91.769	101.757
441	13.8	11.3681	21.5241	31.744	41.7517	51.6802	61.6926	71.6566	81.6408	91.7419	101.711
442	13.82	11.4287	21.4985	31.7363	41.7271	51.6684	61.6348	71.7292	81.6846	91.6984	101.736
443	13.84	11.3862	21.5848	31.7621	41.7384	51.6699	61.6058	71.6853	81.6363	91.7064	101.698
444	13.86	11.3799	21.5134	31.7482	41.7299	51.6999	61.6729	71.7214	81.6272	91.7099	101.745
445	13.88	11.4469	21.5427	31.7475	41.7433	51.6401	61.6303	71.697	81.6333	91.6926	101.726
446	13.9	11.388	21.4952	31.7475	41.7035	51.6802	61.6499	71.7178	81.6386	91.7468	101.721
447	13.92	11.4495	21.5109	31.7503	41.6962	51.6795	61.667	71.6831	81.5957	91.6883	101.779
448	13.94	11.3817	21.4852	31.7363	41.7313	51.6846	61.6348	71.6904	81.5706	91.7341	101.735
449	13.96	11.3645	21.5118	31.6977	41.6692	51.6684	61.6655	71.6984	81.5691	91.7398	101.641
450	13.98	11.3754	21.5101	31.7006	41.7496	51.6287	61.6439	71.6883	81.6249	91.797	101.679
451	14	11.3563	21.4683	31.6904	41.6991	51.6758	61.6853	71.6919	81.6073	91.7341	101.726
452	14.02	11.405	21.4495	31.6846	41.7718	51.6977	61.7121	71.6581	81.6004	91.7327	101.724
453	14.04	11.4023	21.4443	31.715	41.7475	51.6242	61.6514	71.7085	81.6371	91.6933	101.701
454	14.06	11.3294	21.4478	31.6853	41.6941	51.6846	61.6446	71.6824	81.605	91.697	101.77
455	14.08	11.3799	21.464	31.6521	41.737	51.7035	61.584	71.6721	81.5942	91.7064	101.756
456	14.1	11.3996	21.5101	31.7085	41.7341	51.6551	61.6566	71.6802	81.6035	91.7164	101.654
457	14.12	11.3736	21.4606	31.7013	41.7235	51.6196	61.6618	71.678	81.6491	91.6977	101.739
458	14.14	11.4041	21.4742	31.7035	41.7214	51.5965	61.6476	71.6773	81.6618	91.7049	101.719
459	14.16	11.3599	21.4495	31.7071	41.6875	51.6461	61.6386	71.6868	81.6104	91.664	101.738
460	14.18	11.3754	21.4313	31.7306	41.6424	51.6714	61.6081	71.5926	81.6348	91.7164	101.682
461	14.2	11.3925	21.4632	31.6408	41.6839	51.6677	61.6401	71.6977	81.5965	91.7292	101.697
462	14.22	11.4067	21.5346	31.6528	41.6787	51.5879	61.6089	71.628	81.5887	91.7635	101.724
463	14.24	11.3925	21.47	31.6242	41.7426	51.6446	61.6341	71.6758	81.5667	91.6948	101.667
464	14.26	11.3461	21.3781	31.7049	41.7468	51.5651	61.5856	71.6348	81.6081	91.697	101.636
465	14.28	11.3238	21.3979	31.6588	41.6401	51.6119	61.5949	71.6802	81.5515	91.7157	101.642
466	14.3	11.3862	21.446	31.6773	41.6424	51.6707	61.6042	71.5981	81.5265	91.7071	101.638
467	14.32	11.3304	21.427	31.6528	41.667	51.6506	61.6211	71.6897	81.5298	91.6295	101.613
468	14.34	11.4076	21.4173	31.5957	41.6802	51.6729	61.6204	71.6378	81.5563	91.6566	101.679
469	14.36	11.3443	21.4606	31.6625	41.6573	51.5872	61.5659	71.6581	81.605	91.6962	101.639
470	14.38	11.3238	21.4885	31.6558	41.72	51.5706	61.6012	71.6073	81.5224	91.6912	101.671
471	14.4	11.3068	21.4793	31.6787	41.6809	51.5903	61.6211	71.6662	81.5864	91.6536	101.638
472	14.42	11.3359	21.4129	31.6446	41.6802	51.6446	61.5957	71.6325	81.6019	91.6408	101.668
473	14.44	11.3059	21.4191	31.6348	41.678	51.5411	61.5895	71.678	81.6073	91.6765	101.665
474	14.46	11.3489	21.4076	31.6868	41.7285	51.6135	61.6035	71.5965	81.5699	91.7207	101.647
475	14.48	11.3835	21.4572	31.6904	41.6861	51.5817	61.4993	71.6272	81.5911	91.5691	101.639
476	14.5	11.3387	21.4902	31.6371	41.6758	51.6439	61.5762	71.6401	81.5595	91.7085	101.637
477	14.52	11.303	21.4313	31.6081	41.6581	51.6234	61.5627	71.6386	81.5754	91.6265	101.668
478	14.54	11.2877	21.4793	31.6831	41.6119	51.5981	61.5643	71.6499	81.5387	91.6211	101.601
479	14.56	11.3097	21.4426	31.6142	41.6647	51.5777	61.5435	71.6211	81.5872	91.6454	101.636
480	14.58	11.3443	21.4985	31.6603	41.6904	51.5265	61.5289	71.6581	81.5289	91.5563	101.687
481	14.6	11.2605	21.4357	31.6104	41.6318	51.6446	61.5595	71.5903	81.5595	91.6158	101.601
482	14.62	11.3059	21.4059	31.5515	41.6955	51.5809	61.4893	71.5777	81.5627	91.6303	101.52
483	14.64	11.3304	21.3285	31.6573	41.6424	51.6265	61.5706	71.6135	81.52	91.6371	101.634
484	14.66	11.3087	21.405	31.667	41.6058	51.6378	61.5659	71.6096	81.5427	91.6603	101.623
485	14.68	11.2829	21.3916	31.6461	41.5667	51.5832	61.5651	71.5981	81.5208	91.6318	101.592
486	14.7	11.3257	21.4252	31.6401	41.6751	51.5241	61.5191	71.5879	81.5167	91.6211	101.578
487	14.72	11.32	21.464	31.6127	41.6662	51.5403	61.5563	71.5459	81.52	91.631	101.659
488	14.74	11.2916	21.3934	31.6401	41.6318	51.5699	61.5427	71.5667	81.5191	91.6265	101.584
489	14.76	11.2954	21.4243	31.6536	41.5738	51.6112	61.5002	71.6081	81.5579	91.6707	101.573
490	14.78	11.3718	21.4103	31.6257	41.5957	51.6211	61.5403	71.6042	81.5027	91.6242	101.649
491	14.8	11.2288	21.3681	31.6158	41.628	51.5699	61.5643	71.6295	81.5281	91.6119	101.623
492	14.82	11.3011	21.3961	31.6096	41.6142	51.6058	61.5515	71.5507	81.5443	91.577	101.674
493	14.84	11.3106	21.3763	31.5579	41.6499	51.6743	61.5183	71.5762	81.5289	91.6211	101.633
494	14.86	11.2954	21.4278	31.6287	41.6135	51.5126	61.5298	71.5714	81.4902	91.5911	101.575
495	14.88	11.2742	21.3636	31.6356	41.5965	51.6058	61.5427	71.6066	81.4885	91.6662	101.546
496	14.9	11.3021	21.3106	31.6393	41.6325	51.5926	61.5499	71.5659	81.4581	91.5864	101.631
497	14.92	11.2368	21.3387	31.5539	41.6371	51.5627	61.5523	71.573	81.4674	91.5706	101.59
498	14.94	11.2358	21.4005	31.6272	41.6303	51.4776	61.4893	71.5825	81.5403	91.5785	101.584
499	14.96	11.2566	21.3672	31.6119	41.5942	51.5216	61.5159	71.5523	81.5427	91.6127	101.576
500	14.98	11.2537	21.3554	31.5595	41.6066	51.5175	61.5379	71.6265	81.5232	91.5895	101.618
501	15	11.2527	21.3332	31.6173	41.6348	51.5109	61.4708	71.5762	81.4885	91.5762	101.564
502	15.02	11.2097	21.3979	31.5714	41.6333	51.5273	61.5232	71.5777	81.4339	91.5667	101.576
503	15.04	11.1747	21.3987	31.573	41.5379	51.6027	61.52	71.5675	81.4935	91.4767	101.669
504	15.06	11.2546	21.4147	31.5232	41.6058	51.4683	61.5435	71.6295	81.4615	91.6104	101.545
505	15.08	11.2025	21.3754	31.5635	41.6196	51.4826	61.5539	71.5926	81.5134	91.5627	101.544
506	15.1	11.2378	21.348	31.5387	41.5738	51.5175	61.4564	71.5683	81.4674	91.5864	101.542
507	15.12	11.2308	21.3554	31.5651	41.5691	51.5395	61.4348	71.5611	81.5183	91.5675	101.568
508	15.14	11.2625	21.348	31.5683	41.5699	51.6073	61.4606	71.5611	81.5118	91.5491	101.582
509	15.16	11.2338	21.3219	31.5793	41.5903	51.5167	61.4581	71.5988	81.5306	91.5965	101.535
510	15.18	11.1882	21.3681	31.5981	41.5298	51.5085	61.5362	71.5101	81.5126	91.5809	101.557
511	15.2	11.2487	21.379	31.5379	41.6027	51.5043	61.4322	71.491	81.4674	91.5322	101.576
512	15.22	11.2086	21.3754	31.6096	41.5942	51.4944	61.4893	71.5395	81.4606	91.5571	101.534
513	15.24	11.2605	21.3116	31.577	41.5856	51.4818	61.4305	71.5706	81.4725	91.5864	101.596
514	15.26	11.1913	21.279	31.5699	41.5627	51.5281	61.4512	71.5395	81.4742	91.5491	101.568
515	15.28	11.2086	21.335	31.5619	41.5249	51.491	61.4725	71.5241	81.3979	91.6004	101.572
516	15.3	11.1902	21.3434	31.5825	41.5785	51.5035	61.4952	71.5314	81.4666	91.5208	101.539
517	15.32	11.2238	21.3636	31.5595	41.5459	51.5281	61.4717	71.5175	81.5249	91.5809	101.543
518	15.34	11.2328	21.3681	31.5451	41.5101	51.5093	61.4776	71.5706	81.4538	91.5949	101.508
519	15.36	11.2338	21.2537	31.4952	41.5722	51.5403	61.4877	71.5027	81.4623	91.5848	101.593
520	15.38	11.2507	21.3144	31.5354	41.6027	51.52	61.5018	71.4512	81.4919	91.533	101.573
521	15.4	11.1706	21.3341	31.5651	41.6173	51.5085	61.3934	71.4452	81.4734	91.5241	101.548
522	15.42	11.2137	21.2916	31.5051	41.5887	51.4893	61.4217	71.5093	81.4793	91.5491	101.501
523	15.44	11.2781	21.2605	31.5068	41.6027	51.4835	61.4147	71.5068	81.405	91.5635	101.534
524	15.46	11.2368	21.2781	31.5579	41.5683	51.4657	61.4666	71.5635	81.4435	91.5825	101.557
525	15.48	11.1809	21.2954	31.5068	41.5216	51.4581	61.4572	71.5101	81.4632	91.5027	101.548
526	15.5	11.183	21.2973	31.5507	41.4893	51.4977	61.4486	71.5076	81.4885	91.5879	101.503
527	15.52	11.2906	21.3406	31.4985	41.5427	51.5043	61.427	71.4469	81.4435	91.5483	101.51
528	15.54	11.1389	21.3718	31.5085	41.4632	51.5191	61.44	71.5159	81.4261	91.5523	101.554
529	15.56	11.1527	21.3011	31.4843	41.4893	51.4521	61.4112	71.4919	81.4426	91.491	101.564
530	15.58	11.1809	21.2654	31.4555	41.5273	51.4969	61.4623	71.4902	81.4826	91.4969	101.498
531	15.6	11.1548	21.2398	31.4944	41.5035	51.4801	61.4478	71.5035	81.4313	91.496	101.522
532	15.62	11.2076	21.2025	31.4852	41.5322	51.3672	61.4615	71.4708	81.4287	91.4826	101.564
533	15.64	11.1726	21.2935	31.5142	41.464	51.44	61.3709	71.4191	81.4572	91.5085	101.503
534	15.66	11.2167	21.2935	31.496	41.4843	51.4486	61.4339	71.4469	81.4103	91.4759	101.448
535	15.68	11.1517	21.3049	31.5362	41.5134	51.4683	61.4443	71.4546	81.4555	91.4927	101.467
536	15.7	11.1271	21.3387	31.4555	41.5085	51.496	61.4191	71.4734	81.5265	91.4666	101.518
537	15.72	11.1559	21.2368	31.5018	41.496	51.4717	61.4014	71.4885	81.4331	91.5175	101.491
538	15.74	11.1389	21.3332	31.5051	41.5068	51.4305	61.4156	71.5539	81.4417	91.4339	101.476
539	15.76	11.1087	21.3294	31.44	41.4674	51.4581	61.4589	71.5273	81.4208	91.4919	101.506
540	15.78	11.1758	21.2615	31.4944	41.4615	51.3889	61.4191	71.481	81.3987	91.4793	101.508
541	15.8	11.1538	21.2576	31.4666	41.4893	51.3987	61.4005	71.4555	81.3572	91.4927	101.508
542	15.82	11.1674	21.2458	31.5085	41.4919	51.4555	61.4708	71.4623	81.4835	91.4843	101.52
543	15.84	11.1325	21.2398	31.4902	41.4164	51.4112	61.4014	71.4759	81.4208	91.5579	101.489
544	15.86	11.1506	21.2944	31.44	41.5118	51.44	61.3387	71.4512	81.4138	91.4751	101.459
545	15.88	11.2025	21.2298	31.5281	41.4589	51.427	61.4208	71.4927	81.3961	91.4138	101.437
546	15.9	11.1228	21.2868	31.481	41.5289	51.4826	61.3835	71.486	81.4059	91.446	101.456
547	15.92	11.125	21.2819	31.4538	41.5118	51.3826	61.3871	71.4776	81.4383	91.5314	101.503
548	15.94	11.1368	21.2722	31.4103	41.4589	51.4005	61.3681	71.4261	81.4365	91.5322	101.475
549	15.96	11.1517	21.2428	31.5035	41.5101	51.4546	61.2983	71.3763	81.3996	91.52	101.505
550	15.98	11.1954	21.3332	31.4409	41.515	51.4443	61.3996	71.4217	81.37	91.4649	101.468
551	16	11.1464	21.2157	31.4615	41.4426	51.4632	61.4708	71.4598	81.4014	91.4944	101.488
552	16.02	11.1778	21.2308	31.4657	41.506	51.4067	61.4094	71.4191	81.379	91.5018	101.518
553	16.04	11.1087	21.158	31.4391	41.486	51.359	61.4147	71.4032	81.3754	91.4495	101.55
554	16.06	11.0912	21.2858	31.4435	41.4564	51.4717	61.4339	71.4103	81.4138	91.5175	101.43
555	16.08	11.0757	21.2722	31.4868	41.4784	51.4452	61.4112	71.3709	81.4103	91.4598	101.488
556	16.1	11.1601	21.2703	31.4877	41.4173	51.4512	61.3608	71.4734	81.4261	91.4495	101.44
557	16.12	11.1632	21.1664	31.4649	41.4443	51.4512	61.3691	71.5043	81.3871	91.4164	101.427
558	16.14	11.1336	21.279	31.3781	41.4835	51.446	61.3718	71.3434	81.3415	91.427	101.438
559	16.16	11.0967	21.2983	31.4708	41.4103	51.4374	61.3266	71.4365	81.4478	91.4632	101.419
560	16.18	11.0578	21.2507	31.4927	41.4717	51.4112	61.3627	71.4495	81.3943	91.4826	101.478
561	16.2	11.1368	21.2477	31.4657	41.4357	51.3763	61.4278	71.3889	81.3952	91.4623	101.497
562	16.22	11.1077	21.2438	31.4348	41.4014	51.4417	61.3925	71.3826	81.4112	91.4331	101.503
563	16.24	11.1601	21.2248	31.412	41.5126	51.3808	61.3727	71.4666	81.3434	91.481	101.382
564	16.26	11.125	21.1851	31.4313	41.4278	51.42	61.3645	71.3599	81.3916	91.4417	101.39
565	16.28	11.1758	21.2188	31.3889	41.4243	51.3844	61.4067	71.4191	81.2954	91.4691	101.473
566	16.3	11.0304	21.1943	31.4147	41.4826	51.3889	61.3817	71.3844	81.3535	91.4365	101.389
567	16.32	11.1346	21.1882	31.405	41.4023	51.3781	61.3544	71.4649	81.3294	91.4649	101.417
568	16.34	11.1293	21.2076	31.4287	41.4538	51.4059	61.4041	71.3889	81.2198	91.4112	101.448
569	16.36	11.1643	21.1643	31.3844	41.4615	51.4296	61.3257	71.3907	81.2388	91.5159	101.443
570	16.38	11.1432	21.1933	31.4005	41.3934	51.4103	61.3125	71.3862	81.3799	91.4725	101.423
571	16.4	11.0589	21.1622	31.4357	41.4147	51.3799	61.3916	71.4417	81.3853	91.4129	101.406
572	16.42	11.0656	21.1892	31.4623	41.4504	51.405	61.3581	71.3636	81.3754	91.4067	101.373
573	16.44	11.0578	21.2527	31.4339	41.4173	51.3754	61.3498	71.4278	81.3763	91.4305	101.419
574	16.46	11.1011	21.2218	31.3835	41.4182	51.3934	61.3229	71.4243	81.3276	91.3736	101.37
575	16.48	11.051	21.1706	31.3898	41.42	51.3808	61.3097	71.3452	81.2963	91.388	101.416
576	16.5	11.0813	21.2238	31.3961	41.3952	51.3808	61.3461	71.359	81.2819	91.4504	101.393
577	16.52	11.0656	21.183	31.4469	41.4504	51.3772	61.3461	71.405	81.3599	91.4138	101.391
578	16.54	11.0724	21.1706	31.446	41.4589	51.3229	61.3618	71.4032	81.3097	91.4486	101.455
579	16.56	10.9908	21.1022	31.3871	41.3835	51.2916	61.3049	71.3889	81.3059	91.3745	101.381
580	16.58	11.0712	21.1632	31.4365	41.4452	51.3359	61.3219	71.3608	81.3191	91.4391	101.418
581	16.6	11.043	21.14	31.3397	41.4059	51.359	61.2896	71.3544	81.2328	91.4138	101.408
582	16.62	11.06	21.2487	31.4032	41.4305	51.3853	61.335	71.3498	81.2983	91.4357	101.342
583	16.64	11.0824	21.1943	31.3943	41.4129	51.3835	61.2487	71.4014	81.3116	91.4435	101.398
584	16.66	11.0189	21.2025	31.4005	41.3406	51.335	61.3134	71.4014	81.2761	91.4666	101.437
585	16.68	11.089	21.2107	31.3817	41.3599	51.2438	61.2497	71.3736	81.2858	91.4322	101.394
586	16.7	11.0634	21.1716	31.3636	41.4103	51.3424	61.3387	71.3599	81.3461	91.3415	101.444
587	16.72	11.112	21.1747	31.3826	41.4383	51.304	61.2944	71.3736	81.32	91.4041	101.374
588	16.74	10.9837	21.1851	31.4182	41.4339	51.3535	61.2566	71.3718	81.2546	91.4365	101.424
589	16.76	11.0923	21.1653	31.3563	41.3663	51.3627	61.2576	71.3862	81.3153	91.3736	101.42
590	16.78	10.9932	21.2167	31.4094	41.4191	51.3745	61.2703	71.3862	81.2963	91.3554	101.422
591	16.8	11.0108	21.1325	31.4041	41.3443	51.2477	61.3134	71.3229	81.3238	91.4252	101.354
592	16.82	11.0061	21.0978	31.3572	41.3489	51.3508	61.3097	71.3618	81.3443	91.412	101.382
593	16.84	11.035	21.125	31.3332	41.3889	51.2732	61.2477	71.3627	81.2722	91.4059	101.352
594	16.86	11.0453	21.1153	31.3654	41.2906	51.3078	61.2398	71.388	81.2693	91.3943	101.409
595	16.88	11.0578	21.1923	31.3718	41.4173	51.3049	61.2761	71.3961	81.3191	91.3987	101.371
596	16.9	11.0154	21.1153	31.4076	41.4014	51.2517	61.3059	71.3763	81.2674	91.3654	101.308
597	16.92	10.9634	21.0945	31.3304	41.3572	51.3163	61.2829	71.37	81.2268	91.3304	101.377
598	16.94	10.973	21.1569	31.3563	41.3424	51.2983	61.2137	71.3452	81.2781	91.3563	101.28
599	16.96	11.1011	21.1611	31.3144	41.388	51.3257	61.2703	71.3781	81.2732	91.3727	101.343
600	16.98	11.0566	21.1643	31.3443	41.3636	51.3153	61.2954	71.3799	81.2388	91.3618	101.318
601	17	10.9979	21.0824	31.3709	41.3163	51.3517	61.2781	71.3078	81.3332	91.303	101.409
602	17.02	11.0476	21.158	31.32	41.3341	51.2771	61.2925	71.3727	81.3144	91.348	101.362
603	17.04	11.0316	21.0724	31.2615	41.3116	51.2887	61.1685	71.3471	81.2338	91.3826	101.352
604	17.06	10.9789	21.1131	31.2537	41.3544	51.3554	61.2338	71.3799	81.2566	91.3727	101.384
605	17.08	11.0143	21.1185	31.2458	41.3341	51.28	61.1789	71.3681	81.281	91.3369	101.354
606	17.1	11.0281	21.0611	31.2368	41.3461	51.3116	61.1995	71.3672	81.2615	91.2983	101.284
607	17.12	11.0235	21.125	31.3134	41.3663	51.2732	61.2418	71.3304	81.2683	91.3498	101.334
608	17.14	10.9658	21.079	31.3097	41.359	51.2298	61.2157	71.2848	81.2258	91.3508	101.274
609	17.16	10.9573	21.0532	31.2819	41.3443	51.348	61.2887	71.3049	81.3144	91.3266	101.322
610	17.18	11.0026	21.1055	31.2954	41.2546	51.2595	61.2683	71.2527	81.2868	91.2819	101.368
611	17.2	10.9658	21.1517	31.3078	41.3434	51.2507	61.2398	71.3563	81.2713	91.3572	101.295
612	17.22	11.0316	21.112	31.3238	41.2546	51.2732	61.2693	71.2954	81.2408	91.348	101.325
613	17.24	11.0131	21.0645	31.3526	41.3068	51.2348	61.2703	71.2615	81.2097	91.3907	101.296
614	17.26	11.0049	21.1066	31.2983	41.2664	51.2742	61.2338	71.3618	81.183	91.3862	101.337
615	17.28	10.9549	21.125	31.3219	41.3049	51.3087	61.2188	71.3294	81.2056	91.2954	101.292
616	17.3	11.0166	21.1485	31.2644	41.304	51.2761	61.2097	71.2664	81.2615	91.3285	101.376
617	17.32	11.0419	21.1282	31.2683	41.3002	51.3563	61.2566	71.2722	81.2107	91.3322	101.36
618	17.34	11.0293	21.0967	31.2683	41.3727	51.2829	61.1789	71.281	81.2218	91.3461	101.336
619	17.36	10.9955	21.0589	31.279	41.2713	51.2076	61.2318	71.2066	81.2025	91.3663	101.354
620	17.38	10.9476	21.1011	31.3276	41.3443	51.2829	61.2228	71.2338	81.2238	91.3257	101.273
621	17.4	10.9056	21.0967	31.304	41.3219	51.2428	61.1954	71.2378	81.2278	91.2683	101.274
622	17.42	10.9778	21.0362	31.2428	41.2605	51.32	61.2752	71.2674	81.1984	91.3443	101.266
623	17.44	11.0002	21.0293	31.2722	41.3599	51.2527	61.2308	71.3059	81.2761	91.2829	101.321
624	17.46	10.9379	21.0679	31.2722	41.2654	51.2046	61.2178	71.303	81.2338	91.3172	101.308
625	17.48	11.0224	21.0498	31.2368	41.3002	51.2467	61.1913	71.2761	81.2388	91.3134	101.315
626	17.5	10.9206	21.0407	31.2703	41.2378	51.3153	61.2208	71.2408	81.1789	91.3304	101.33
627	17.52	10.9991	21.0316	31.3011	41.2318	51.3134	61.2248	71.2537	81.2458	91.3754	101.27
628	17.54	10.9884	21.0724	31.2556	41.2268	51.28	61.2477	71.2983	81.1902	91.2916	101.299
629	17.56	10.9342	21.0073	31.3182	41.2015	51.2992	61.28	71.2674	81.1685	91.2887	101.222
630	17.58	10.9106	21.0934	31.2408	41.2771	51.1984	61.1974	71.2713	81.3172	91.3535	101.34
631	17.6	10.9464	20.992	31.2605	41.2635	51.2056	61.1559	71.28	81.2167	91.2906	101.232
632	17.62	10.9342	21.0857	31.2713	41.2887	51.1548	61.2066	71.28	81.1442	91.2318	101.233
633	17.64	10.8816	21.0108	31.3172	41.2916	51.1984	61.1799	71.2877	81.2036	91.2916	101.238
634	17.66	10.9932	21.0396	31.2036	41.2781	51.2448	61.1664	71.28	81.1495	91.2944	101.205
635	17.68	10.9682	20.9706	31.2546	41.3508	51.2527	61.1913	71.2348	81.1882	91.2906	101.33
636	17.7	11.0002	21.0247	31.2438	41.2742	51.2097	61.2015	71.2537	81.2388	91.2916	101.295
637	17.72	10.9682	21.0724	31.1768	41.3087	51.2228	61.2208	71.1995	81.1378	91.2556	101.295
638	17.74	10.9813	21.0453	31.2157	41.2438	51.281	61.2097	71.1974	81.184	91.2288	101.211
639	17.76	10.8981	21.0487	31.2586	41.3144	51.1737	61.1495	71.2066	81.1716	91.2507	101.199
640	17.78	10.9573	20.9967	31.2537	41.3011	51.2983	61.1933	71.2248	81.1695	91.3106	101.25
641	17.8	10.9366	20.9403	31.2188	41.2954	51.2418	61.1548	71.2348	81.1622	91.2674	101.196
642	17.82	10.9634	20.9944	31.2198	41.3049	51.2546	61.183	71.2732	81.1923	91.2973	101.227
643	17.84	11.0061	21.0119	31.2595	41.279	51.2839	61.2076	71.2517	81.1674	91.2458	101.247
644	17.86	10.8854	20.9706	31.2338	41.2935	51.2771	61.1737	71.2418	81.14	91.2378	101.264
645	17.88	10.9317	21.0453	31.2288	41.2605	51.2328	61.1643	71.2107	81.1325	91.2732	101.226
646	17.9	10.9231	21.0143	31.2238	41.2906	51.2477	61.1643	71.1548	81.1882	91.2338	101.22
647	17.92	10.8842	21.0623	31.2752	41.2916	51.2147	61.1453	71.1913	81.0868	91.2338	101.22
648	17.94	10.8765	20.9932	31.2674	41.2896	51.1913	61.1495	71.2248	81.1622	91.2086	101.225
649	17.96	10.8416	21.0645	31.2157	41.2448	51.2157	61.1768	71.1913	81.184	91.2693	101.246
650	17.98	10.9379	20.9501	31.2448	41.279	51.2015	61.1737	71.2298	81.1474	91.2477	101.21
651	18	10.9379	21.0453	31.2858	41.3144	51.2507	61.1261	71.1892	81.1726	91.2654	101.242
652	18.02	10.928	21.0096	31.2178	41.32	51.2208	61.1217	71.2228	81.1861	91.1861	101.194
653	18.04	10.9646	21.0578	31.2157	41.2448	51.1789	61.1559	71.2992	81.1421	91.2507	101.217
654	18.06	10.8918	21.0316	31.2025	41.2278	51.2674	61.158	71.1851	81.0868	91.2107	101.215
655	18.08	10.9598	20.9813	31.2167	41.28	51.2228	61.1044	71.125	81.159	91.2635	101.19
656	18.1	10.9119	20.9801	31.1984	41.2238	51.1974	61.1964	71.2107	81.1485	91.2527	101.158
657	18.12	10.9452	20.9754	31.2517	41.2318	51.1569	61.1357	71.1632	81.125	91.2693	101.165
658	18.14	10.9464	21.0578	31.1943	41.2076	51.2477	61.1044	71.1726	81.1239	91.1611	101.148
659	18.16	10.9293	21.043	31.2076	41.2398	51.2167	61.1066	71.1368	81.0901	91.2228	101.148
660	18.18	10.9069	21.0049	31.1995	41.2458	51.1538	61.1077	71.1778	81.1421	91.2238	101.158
661	18.2	10.9742	21.0532	31.1695	41.2097	51.2015	61.1622	71.2338	81.2036	91.2066	101.255
662	18.22	10.9391	20.9778	31.1643	41.1871	51.1706	61.1442	71.1943	81.0802	91.2238	101.209
663	18.24	10.835	21.0189	31.2127	41.2005	51.1861	61.0779	71.2278	81.1357	91.2752	101.213
664	18.26	10.8468	21.0073	31.1163	41.2338	51.2238	61.1055	71.2228	81.1674	91.2378	101.102
665	18.28	10.835	21.0487	31.1706	41.1601	51.2238	61.1207	71.1984	81.1153	91.1611	101.177
666	18.3	10.9391	20.888	31.2487	41.1685	51.1943	61.1453	71.1185	81.1569	91.2527	101.198
667	18.32	10.9206	21.0453	31.1378	41.1611	51.2137	61.0857	71.0912	81.1506	91.1357	101.187
668	18.34	10.9044	20.9403	31.1601	41.1314	51.1495	61.1033	71.2005	81.1098	91.2188	101.09
669	18.36	10.8624	20.9464	31.1314	41.141	51.1196	61.1685	71.158	81.1174	91.1778	101.194
670	18.38	10.8752	20.9044	31.2025	41.1474	51.1207	61.1131	71.1357	81.0258	91.2288	101.198
671	18.4	10.8218	20.9513	31.2198	41.1726	51.1336	61.1271	71.1548	81.0373	91.1768	101.18
672	18.42	10.7566	20.944	31.1737	41.1632	51.0923	61.0532	71.2328	81.0956	91.1758	101.13
673	18.44	10.8218	20.9019	31.1474	41.2097	51.1995	61.1055	71.2046	81.0802	91.2086	101.139
674	18.46	10.8637	20.8893	31.1611	41.1474	51.1098	61.1077	71.2046	81.0014	91.1271	101.155
675	18.48	10.8662	20.9415	31.1538	41.182	51.1044	61.06	71.1943	81.1022	91.1569	101.099
676	18.5	10.8829	20.9801	31.1196	41.2467	51.1506	61.1174	71.184	81.0768	91.1336	101.182
677	18.52	10.8727	20.9598	31.1033	41.1964	51.182	61.0912	71.1548	81.0566	91.1389	101.181
678	18.54	10.8778	20.8533	31.1923	41.1974	51.0701	61.0373	71.112	81.0835	91.1453	101.108
679	18.56	10.888	20.9967	31.1527	41.1517	51.1131	61.0768	71.1304	81.0813	91.1747	101.08
680	18.58	10.9156	20.8559	31.1228	41.1207	51.1643	61.0049	71.1293	81.1569	91.1726	101.066
681	18.6	10.7922	20.8778	31.1336	41.1336	51.125	61.0498	71.1913	81.0912	91.1643	101.092
682	18.62	10.8084	20.9317	31.1421	41.2137	51.1378	61.1011	71.1695	81.0945	91.1131	101.12
683	18.64	10.8165	20.9144	31.1432	41.1685	51.0712	61.0119	71.1389	81.1548	91.1995	101.107
684	18.66	10.888	20.9464	31.0779	41.1974	51.1378	61.0912	71.1622	81.0108	91.141	101.146
685	18.68	10.8455	20.8598	31.1442	41.079	51.089	61.1378	71.0901	80.9849	91.2127	101.137
686	18.7	10.8376	20.9682	31.1747	41.1538	51.0281	61.089	71.1527	81.0362	91.2076	101.065
687	18.72	10.8559	21.035	31.0923	41.051	51.1622	61.0555	71.0868	81.0304	91.1726	101.097
688	18.74	10.9317	20.9742	31.1271	41.125	51.1421	61.0544	71.1389	81.0049	91.0757	101.091
689	18.76	10.8611	20.8981	31.1174	41.1622	51.1185	61.0589	71.1389	81.0476	91.14	101.08
690	18.78	10.8481	20.9156	31.1142	41.1569	51.1653	61.0096	71.1196	81.1261	91.0978	101.071
691	18.8	10.8968	20.8867	31.0487	41.1109	51.0724	61.0442	71.1153	81.1055	91.1601	101.073
692	18.82	10.8468	20.967	31.0487	41.1109	51.0989	61.0712	71.141	81.0154	91.1695	101.135
693	18.84	10.8218	20.9403	31.0768	41.089	51.1153	61.0362	71.1538	81.0578	91.1737	101.085
694	18.86	10.751	20.8765	31.0453	41.089	51.0247	61.0442	71.1271	80.9873	91.0464	101.12
695	18.88	10.8389	20.9694	31.0835	41.1098	51.1421	60.9849	71.051	81.0373	91.1569	101.114
696	18.9	10.7827	20.9489	31.0316	41.1664	51.0701	61.0712	71.1066	81.079	91.1109	101.05
697	18.92	10.7855	20.9428	31.1304	41.2368	51.0668	61.0339	71.0668	80.992	91.2076	101.12
698	18.94	10.7676	20.9586	31.0901	41.1611	51.1207	60.9884	71.0442	81.0623	91.1389	101.069
699	18.96	10.78	20.9586	31.0131	41.2178	51.141	60.9932	71.1153	81.1185	91.1442	101.129
700	18.98	10.7566	20.9106	31.0901	41.1974	51.069	61.0396	71.1304	81.0989	91.1861	101.08
701	19	10.8204	20.9256	31.0813	41.1569	51.0566	61.0419	71.1747	80.992	91.0923	101.044
702	19.02	10.7882	20.928	31.069	41.1325	51.0813	60.9694	71.1055	81.0084	91.1453	101.102
703	19.04	10.8442	20.8624	31.1282	41.1282	51.1044	60.9908	71.1378	81.0108	91.1314	101.154
704	19.06	10.7827	20.9293	31.1304	41.1706	51.0589	60.9955	71.1011	81.0143	91.1163	101.12
705	19.08	10.7922	20.961	31.0934	41.079	51.0934	60.992	71.14	80.9849	91.1196	101.018
706	19.1	10.7704	20.8004	31.0712	41.043	51.112	60.9206	71.0857	81.0166	91.1055	101.082
707	19.12	10.8572	20.852	31.0611	41.1	51.0339	60.9415	71.0247	80.9391	91.1022	101.04
708	19.14	10.888	20.7745	31.0293	41.1378	51.1	60.9354	71.0956	80.9884	91.0487	101.057
709	19.16	10.799	20.852	31.0634	41.069	51.0396	61.0339	71.1033	81.0589	91.0668	101.083
710	19.18	10.7099	20.8688	31.069	41.079	51.0802	60.9706	71.0316	81.0108	91.1174	101.056
711	19.2	10.8111	20.9525	31.0327	41.1261	51.0623	60.9861	71.0464	81.0757	91.0623	101.071
712	19.22	10.8031	20.9044	31.0487	41.1077	50.9967	60.9476	71.051	80.9944	91.0846	101.071
713	19.24	10.7327	20.8004	31.0735	41.0293	51.0396	61.0247	71.1066	81.0212	91.0623	101.048
714	19.26	10.7157	20.9144	31.0189	41.1346	50.9801	60.9206	71.1464	81.027	91.1314	101.01
715	19.28	10.799	20.9031	31.0464	41.0757	51.035	60.9415	71.1033	81.1077	91.1185	100.993
716	19.3	10.7621	20.9006	31.0645	41.0735	51.0724	60.9537	71.089	80.9991	91.1239	101.082
717	19.32	10.8204	20.8204	31.0304	41.0824	51.0857	61.0453	71.0154	81.0235	91.1346	101.007
718	19.34	10.7285	20.8559	30.992	41.0668	51.035	60.9243	71.0096	80.9908	91.1087	101.058
719	19.36	10.7773	20.7635	31.0656	41.043	51.1011	61.0002	71.0487	81.0131	91.069	101.061
720	19.38	10.7827	20.8231	31.069	41.069	51.0212	60.967	71.0235	80.9991	91.1098	101.041
721	19.4	10.7759	20.9044	31.0327	41.0645	51.0611	60.9513	71.1325	80.9598	91.0857	101.034
722	19.42	10.7299	20.7676	31.1066	41.0327	51.0247	60.967	71.0566	80.9801	91.0857	101.037
723	19.44	10.7566	20.8231	31.0912	41.043	51.0712	61.0002	71.0026	81.0235	91.0453	101.015
724	19.46	10.7607	20.8258	31.0407	41.0578	51.0235	60.9256	70.9944	81.0544	91.0119	101.017
725	19.48	10.7814	20.8218	30.9873	41.0166	50.9908	60.9231	71.043	80.9549	91.0281	101.025
726	19.5	10.7454	20.8494	31.0131	41.1	51.0154	60.9634	71.0757	80.9694	91.0945	100.992
727	19.52	10.7963	20.7909	31.0189	40.9967	51.0177	60.8416	71.0701	80.9044	91.0724	100.942
728	19.54	10.7257	20.8376	31.0166	41.0544	51.0634	60.9501	71.0108	80.9967	91.0701	101.033
729	19.56	10.7271	20.7773	30.9243	41.0802	51.0096	61.0498	70.9873	81.0143	91.0385	101.07
730	19.58	10.7718	20.7977	30.9908	41.0316	50.9342	60.9489	71.0442	81.0108	91.0779	100.986
731	19.6	10.7185	20.7786	31.0177	41.0487	50.9955	60.9231	71.0498	80.9501	91.0879	101.051
732	19.62	10.7566	20.8165	30.9861	41.0846	51.0385	60.8842	71.0868	81.0247	91.0247	101.073
733	19.64	10.7909	20.7579	31.0634	40.9861	51.0014	60.944	71.0476	80.9537	91.0846	101.03
734	19.66	10.7142	20.744	30.9955	41.0623	50.9801	60.9106	70.9908	80.967	91.0002	101.056
735	19.68	10.799	20.852	30.9646	41.0846	50.9658	60.9194	71.0154	80.9801	91.0073	100.977
736	19.7	10.7579	20.8031	31.0154	41.0679	51.0757	60.8943	71.043	80.9884	91.0779	101.015
737	19.72	10.7868	20.865	30.9754	41.0073	50.9801	60.8842	71.0656	80.961	91.0362	100.979
738	19.74	10.7663	20.8191	30.9801	41.051	51.0281	60.9106	71.0923	80.9778	91.0119	101.007
739	19.76	10.7868	20.7482	31.0073	41.0293	51.0002	60.9181	71.0316	81.0084	91.0002	100.946
740	19.78	10.7676	20.8165	31.027	41.0304	51.0119	60.9476	71.0396	80.8981	91.0735	100.977
741	19.8	10.6318	20.9106	31.0201	41.0956	51.0073	60.9537	70.973	80.9169	91.0049	100.977
742	19.82	10.744	20.8585	31.0247	41.1011	51.0487	60.8778	71.0131	80.9501	90.9766	100.929
743	19.84	10.6765	20.8031	31.0073	41.1622	51.0453	60.9106	71.0498	80.9646	91.0084	100.979
744	19.86	10.7607	20.8297	31.069	41.0201	51.0967	60.9056	71.043	80.9415	91.1131	101.013
745	19.88	10.7663	20.8481	31.0281	41.0634	51.0453	60.8816	70.9181	80.9622	91.0154	100.986
746	19.9	10.7085	20.7786	31.0014	41.035	51.0304	60.9293	70.9932	80.961	90.9884	100.992
747	19.92	10.6955	20.7786	30.973	41.0464	50.9849	60.9019	71.0442	80.9549	91.0154	101.017
748	19.94	10.7313	20.7827	31.0073	41.0835	50.9428	61.0293	70.944	80.9206	91.0824	100.983
749	19.96	10.7718	20.8218	30.9932	41.1239	50.9837	60.9019	71.06	80.8854	90.973	100.939
750	19.98	10.7242	20.7621	30.9256	41.1346	51.0084	60.9403	70.9967	80.9317	91.035	100.973
751	20	10.6484	20.7855	31.0143	41.1239	51.0143	60.9256	71.0487	80.8893	91.0119	100.99
752	20.02	10.7384	20.7482	31.0757	41.1	51.0442	60.9561	71.0235	80.9742	91.0476	100.99
753	20.04	10.7128	20.8031	30.973	41.0373	51.0002	60.9415	71.1174	80.9955	91.0442	101.035
754	20.06	10.6999	20.8165	30.9513	41.0912	50.9967	60.9391	71.0724	80.9525	91.0247	100.983
755	20.08	10.7621	20.7482	30.9932	41.1464	51.0002	61.0212	71.0385	80.9742	91.0166	101.018
756	20.1	10.6926	20.8337	31.0566	41.1768	51.0464	61.0258	71.1142	80.8662	90.9428	100.963
757	20.12	10.6868	20.8778	31.035	41.1087	50.992	60.8918	71.0258	80.9634	91.0724	100.939
758	20.14	10.7936	20.8258	30.973	40.9778	51.0154	60.8981	71.051	80.9837	90.9861	100.967
759	20.16	10.6707	20.799	30.9884	40.9884	51.0002	60.9243	71.0212	80.9513	90.9317	100.973
760	20.18	10.8044	20.795	30.9243	41.035	51.0014	60.8363	71.0247	80.9231	91.0166	101.003
761	20.2	10.7482	20.7759	30.9873	41.0131	51.0189	60.8727	70.9501	80.8829	91.0002	100.907
762	20.22	10.7426	20.7676	30.9932	41.0131	51.0912	60.8943	71.0623	80.973	91.0014	100.992
763	20.24	10.751	20.7814	30.9778	40.9718	50.9967	60.9305	70.9694	80.9169	90.9718	100.952
764	20.26	10.7042	20.7663	30.9742	41.0224	50.9537	60.8803	71.0373	80.9354	90.9789	100.983
765	20.28	10.7042	20.8124	31.0201	40.9754	50.961	60.8416	70.9537	80.9452	90.9967	100.896
766	20.3	10.8071	20.7882	30.9813	41.0373	51.0464	60.8765	70.9513	80.9305	91.0498	100.939
767	20.32	10.7895	20.7663	30.9501	41.0442	50.9305	60.9825	70.9415	80.9156	90.9658	100.996
768	20.34	10.7085	20.7718	30.9501	41.0779	50.9131	60.8376	70.9967	80.9991	90.9006	100.912
769	20.36	10.6839	20.7552	30.9754	41.0824	50.992	60.8637	71.0566	80.9634	91.0362	100.917
770	20.38	10.7271	20.7056	30.992	40.9991	51.0014	60.8867	70.9537	81.0096	90.9825	100.932
771	20.4	10.7496	20.7635	30.9979	40.9525	50.9573	60.8403	70.944	80.9106	90.9908	100.898
772	20.42	10.7171	20.7214	30.9622	41.0026	50.9537	60.8455	70.9452	80.9561	90.9754	100.923
773	20.44	10.5981	20.769	31.0327	40.9658	50.9513	60.8765	71.0108	80.8559	91.0143	100.967
774	20.46	10.7114	20.751	30.9501	41.0304	50.9081	60.8854	71.0096	80.9056	90.967	100.868
775	20.48	10.7356	20.7593	30.9706	40.9243	50.973	60.8842	70.9415	80.928	90.9837	100.948
776	20.5	10.7271	20.737	30.9305	40.9031	50.9598	60.933	70.9754	80.8688	90.9525	100.918
777	20.52	10.7271	20.7649	30.8559	41.0189	50.9658	60.8071	70.9718	80.8854	90.9873	100.849
778	20.54	10.6839	20.7621	30.9754	41.0108	50.9801	60.8124	70.8191	80.8624	90.9991	100.959
779	20.56	10.6868	20.8231	31.0002	40.9861	50.8893	60.8416	70.9094	80.8854	90.9342	100.914
780	20.58	10.7827	20.6912	30.944	40.9694	50.9658	60.8442	71.0002	80.8218	90.9206	100.861
781	20.6	10.6543	20.7621	30.9537	40.9634	50.9561	60.8727	70.9156	81.0038	91.0084	100.935
782	20.62	10.6721	20.6677	30.9694	40.9932	50.9549	60.7868	70.9342	80.9415	90.9979	100.888
783	20.64	10.6677	20.7759	30.9156	40.9489	50.8842	60.8662	70.9682	80.8507	91.0061	100.914
784	20.66	10.795	20.7114	30.9476	40.9944	50.9658	60.8258	70.9452	80.8403	90.9476	100.887
785	20.68	10.6853	20.7426	30.9366	40.9694	50.9194	60.8481	70.9156	80.8017	91.0026	100.966
786	20.7	10.6135	20.7013	30.9144	40.9131	51.0061	60.8905	70.8968	80.8943	90.9379	100.845
787	20.72	10.5981	20.7759	30.9106	40.9778	50.9379	60.8271	70.9501	80.8507	90.9144	100.858
788	20.74	10.6424	20.7454	30.8803	40.9742	51.0049	60.8468	70.9206	80.8559	90.9837	100.933
789	20.76	10.6242	20.7171	30.865	40.8905	50.9622	60.8507	70.888	80.8701	91.0108	100.843
790	20.78	10.7299	20.7271	30.8546	40.9586	50.8701	60.8151	70.8611	80.8611	90.933	100.879
791	20.8	10.6839	20.7271	30.8429	40.9106	50.8803	60.8429	70.9069	80.8111	90.9366	100.845
792	20.82	10.6303	20.697	30.9106	41.0154	50.9342	60.8363	70.9391	80.8337	90.9476	100.858
793	20.84	10.6211	20.7171	30.9056	40.9513	50.933	60.8572	70.9379	80.7496	90.944	100.827
794	20.86	10.5934	20.7773	30.9464	40.8124	50.9006	60.8778	70.9293	80.7882	90.9305	100.815
795	20.88	10.6573	20.697	30.8598	40.9044	50.8943	60.8098	70.9019	80.8284	90.9156	100.852
796	20.9	10.615	20.6707	30.8611	40.9305	50.888	60.8057	70.8084	80.8481	90.9069	100.781
797	20.92	10.6119	20.7313	30.8994	41.0154	50.8637	60.8533	70.8701	80.8057	90.9366	100.803
798	20.94	10.6227	20.7635	30.9019	40.9549	50.9317	60.8004	70.8624	80.8138	90.9766	100.946
799	20.96	10.6868	20.6795	30.8442	40.9476	50.9452	60.7663	70.944	80.888	90.9742	100.824
800	20.98	10.6333	20.8098	30.8752	40.9706	50.8559	60.799	70.9525	80.9119	90.9573	100.832
801	21	10.6883	20.5996	30.7963	40.9561	50.9801	60.7786	70.9031	80.8124	90.9293	100.924
802	21.02	10.7042	20.6926	30.8829	41.0235	50.8854	60.8178	70.9293	80.8416	90.9181	100.86
803	21.04	10.6926	20.6677	30.944	41.0835	50.9056	60.9169	70.7977	80.7786	90.9513	100.84
804	21.06	10.6257	20.7384	31.0498	41.069	50.928	60.8442	70.9801	80.9415	91.0061	100.965
805	21.08	10.6104	20.7745	31.0589	41.027	50.992	60.8727	70.9706	80.8442	91.035	100.871
806	21.1	10.6439	20.7855	31.2066	40.9944	51.0026	60.9094	70.9464	80.8004	90.9754	100.902
807	21.12	10.6119	20.7718	31.1163	41.0258	51.0476	60.9181	70.9884	80.8017	91.0645	100.986
808	21.14	10.6272	20.8044	31.027	40.9305	51.0131	60.9825	70.9682	80.9056	90.9694	101.041
809	21.16	10.6558	20.8778	30.9706	40.9549	51.0578	60.8637	70.9119	80.9119	90.9206	101.036
810	21.18	10.6439	20.7977	30.9561	40.9131	51.0634	60.8956	70.9742	80.933	90.9525	100.952
811	21.2	10.7242	20.8918	30.928	40.9464	50.9849	60.8778	70.9537	80.9379	90.8701	100.939
812	21.22	10.7621	20.8611	30.9243	40.9501	50.9967	60.831	70.9754	80.9476	90.9403	100.944
813	21.24	10.7621	20.9754	30.8752	40.8842	50.865	60.8481	70.973	80.8752	90.8297	100.927
814	21.26	10.835	20.874	30.9131	40.8727	50.9682	60.7895	70.8803	80.8688	90.8994	100.819
815	21.28	10.8017	20.9056	30.8956	40.9081	50.9464	60.8829	70.9094	80.8218	90.9156	100.868
816	21.3	10.8004	20.7827	30.9031	40.8507	50.9379	60.8044	70.933	80.8455	90.9464	100.754
817	21.32	10.6912	20.7242	30.8494	40.8662	50.9019	60.893	70.8442	80.8258	90.831	100.864
818	21.34	10.6514	20.7538	30.8701	40.9069	50.9415	60.7827	70.865	80.7841	90.8389	100.84
819	21.36	10.6573	20.6897	30.8389	40.8337	50.9181	60.8138	70.8611	80.7895	90.8867	100.839
820	21.38	10.6955	20.6751	30.7496	40.8337	50.888	60.737	70.8481	80.8363	90.9006	100.769
821	21.4	10.6897	20.6912	30.8376	40.8284	50.8324	60.7882	70.9415	80.8389	90.8468	100.759
822	21.42	10.5918	20.6912	30.7895	40.8714	50.9069	60.8637	70.8017	80.7013	90.8337	100.811
823	21.44	10.6135	20.7228	30.8191	40.8778	50.9366	60.8994	70.8701	80.7977	90.8455	100.814
824	21.46	10.5949	20.6333	30.8258	40.9006	50.8598	60.7936	70.8803	80.8151	90.933	100.901
825	21.48	10.5523	20.6926	30.7621	40.8803	50.893	60.799	70.9181	80.7759	90.8546	100.799
826	21.5	10.6912	20.6424	30.835	40.8403	50.835	60.7566	70.7963	80.8752	90.8481	100.893
827	21.52	10.6499	20.6736	30.8533	40.8416	50.8071	60.7855	70.8559	80.7745	90.9131	100.754
828	21.54	10.6227	20.7356	30.8111	40.8867	50.7827	60.799	70.8258	80.8598	90.8494	100.798
829	21.56	10.6089	20.7142	30.8258	40.8324	50.8204	60.7056	70.8994	80.8031	90.9019	100.839
830	21.58	10.5651	20.6618	30.9119	40.7841	50.8258	60.7538	70.8044	80.7566	90.8585	100.772
831	21.6	10.5427	20.6424	30.8403	40.8455	50.8714	60.6955	70.8688	80.7496	90.8701	100.761
832	21.62	10.6287	20.7242	30.8507	40.7868	50.8481	60.7607	70.7977	80.7895	90.8701	100.706
833	21.64	10.5507	20.6662	30.8111	40.8572	50.8727	60.6633	70.874	80.8376	90.8854	100.759
834	21.66	10.5411	20.6318	30.78	40.8057	50.8191	60.7718	70.8004	80.7786	90.9256	100.83
835	21.68	10.5777	20.5996	30.7786	40.8297	50.799	60.7593	70.7384	80.751	90.9019	100.788
836	21.7	10.5762	20.7185	30.7635	40.8675	50.8165	60.7936	70.8752	80.7027	90.9181	100.8
837	21.72	10.5051	20.6839	30.8284	40.7841	50.8572	60.8178	70.888	80.795	90.7773	100.721
838	21.74	10.6104	20.6941	30.7977	40.888	50.8585	60.7285	70.8138	80.7649	90.7814	100.758
839	21.76	10.5887	20.7114	30.8218	40.8816	50.8004	60.7607	70.8165	80.7482	90.874	100.798
840	21.78	10.6027	20.6588	30.7745	40.8585	50.8727	60.8124	70.8533	80.9094	90.8662	100.783
841	21.8	10.5903	20.6424	30.9144	40.8893	50.8688	60.7056	70.8546	80.7827	90.8791	100.703
842	21.82	10.5298	20.6408	30.7773	40.8624	50.7936	60.799	70.9031	80.7663	90.8124	100.787
843	21.84	10.5714	20.6012	30.7759	40.9243	50.8546	60.6926	70.9156	80.7468	90.835	100.804
844	21.86	10.5587	20.5571	30.8057	40.893	50.7704	60.6765	70.8363	80.7412	90.8271	100.747
845	21.88	10.5683	20.6257	30.7384	40.8324	50.7704	60.678	70.8084	80.7704	90.8389	100.672
846	21.9	10.5887	20.5777	30.7868	40.7882	50.852	60.8138	70.8111	80.7649	90.7635	100.731
847	21.92	10.4767	20.5872	30.678	40.8057	50.8297	60.6999	70.7538	80.8376	90.8494	100.736
848	21.94	10.4852	20.5746	30.8071	40.8533	50.795	60.7538	70.8204	80.7922	90.8178	100.711
849	21.96	10.4818	20.7056	30.7855	40.8968	50.7426	60.7128	70.8071	80.7398	90.8867	100.73
850	21.98	10.5475	20.6227	30.7228	40.8165	50.8017	60.7468	70.7607	80.737	90.8084	100.751
851	22	10.5411	20.584	30.7214	40.799	50.8675	60.7384	70.7593	80.8084	90.7745	100.802
852	22.02	10.5809	20.5918	30.8044	40.7704	50.8442	60.6424	70.7922	80.8688	90.8044	100.802
853	22.04	10.5507	20.5996	30.8004	40.799	50.8218	60.7731	70.6984	80.6883	90.751	100.651
854	22.06	10.5395	20.7013	30.8231	40.8031	50.769	60.7579	70.7977	80.7895	90.7718	100.751
855	22.08	10.5167	20.5249	30.7895	40.7895	50.8284	60.7242	70.8151	80.7412	90.7731	100.775
856	22.1	10.6454	20.5918	30.7649	40.8376	50.831	60.6573	70.7977	80.8138	90.8271	100.787
857	22.12	10.5619	20.5035	30.7299	40.8178	50.8363	60.7171	70.7607	80.6883	90.7963	100.721
858	22.14	10.5314	20.6287	30.7579	40.8429	50.8031	60.72	70.7718	80.769	90.7895	100.758
859	22.16	10.5411	20.5051	30.7868	40.7977	50.8624	60.7099	70.874	80.6135	90.78	100.759
860	22.18	10.5555	20.5035	30.7607	40.8284	50.795	60.7242	70.7909	80.7313	90.7566	100.713
861	22.2	10.4615	20.5825	30.7242	40.8337	50.751	60.7185	70.795	80.6736	90.7621	100.758
862	22.22	10.5475	20.6211	30.7963	40.7814	50.7426	60.697	70.8204	80.6618	90.7579	100.682
863	22.24	10.6012	20.5651	30.8258	40.8044	50.8494	60.7635	70.8151	80.6408	90.7868	100.787
864	22.26	10.5651	20.5903	30.7977	40.8004	50.7663	60.6543	70.795	80.6853	90.7566	100.737
865	22.28	10.5281	20.6363	30.888	40.8071	50.6868	60.7271	70.799	80.744	90.8637	100.669
866	22.3	10.5265	20.5555	30.7855	40.7214	50.8057	60.751	70.7621	80.6528	90.7731	100.73
867	22.32	10.5265	20.5395	30.8017	40.8688	50.799	60.7482	70.7718	80.7171	90.8138	100.731
868	22.34	10.52	20.5667	30.7496	40.7313	50.7895	60.7257	70.7142	80.7071	90.7731	100.741
869	22.36	10.5265	20.5934	30.7676	40.8429	50.7704	60.6588	70.7171	80.6751	90.7412	100.733
870	22.38	10.4409	20.5491	30.8244	40.8494	50.8258	60.6543	70.799	80.72	90.8258	100.741
871	22.4	10.5683	20.533	30.8004	40.7228	50.7327	60.6514	70.6984	80.6883	90.7827	100.736
872	22.42	10.6104	20.5887	30.7704	40.78	50.8138	60.6897	70.7663	80.7027	90.7922	100.7
873	22.44	10.4598	20.4868	30.7384	40.8494	50.78	60.6721	70.7426	80.8138	90.7398	100.75
874	22.46	10.5068	20.5249	30.751	40.8533	50.7027	60.6765	70.7718	80.7759	90.7228	100.723
875	22.48	10.47	20.6089	30.795	40.8727	50.8098	60.6736	70.7398	80.7384	90.8376	100.731
876	22.5	10.584	20.6104	30.8057	40.8429	50.7593	60.678	70.7676	80.697	90.8098	100.698
877	22.52	10.4357	20.5965	30.7635	40.8178	50.8324	60.6378	70.6853	80.7356	90.7468	100.711
878	22.54	10.4529	20.4835	30.7099	40.7814	50.6955	60.6647	70.8031	80.7099	90.8031	100.773
879	22.56	10.5232	20.5667	30.8124	40.7745	50.6853	60.6751	70.8231	80.6707	90.8004	100.711
880	22.58	10.4683	20.5507	30.7607	40.8481	50.7384	60.6677	70.7868	80.6662	90.8284	100.77
881	22.6	10.5002	20.5996	30.7841	40.8258	50.8598	60.6897	70.7257	80.6955	90.8218	100.717
882	22.62	10.4852	20.6196	30.8165	40.7718	50.8363	60.6573	70.72	80.7013	90.751	100.745
883	22.64	10.5232	20.4717	30.8098	40.7882	50.8231	60.6647	70.6941	80.7649	90.7704	100.696
884	22.66	10.5167	20.4801	30.7649	40.8363	50.8044	60.7552	70.7731	80.8191	90.7566	100.709
885	22.68	10.4852	20.5651	30.8057	40.8416	50.8494	60.7552	70.7745	80.7635	90.7341	100.714
886	22.7	10.5714	20.5555	30.7398	40.8098	50.8071	60.7814	70.7013	80.7299	90.7579	100.738
887	22.72	10.6348	20.5281	30.7171	40.7468	50.7773	60.6692	70.7468	80.6824	90.7868	100.7
888	22.74	10.6104	20.5714	30.7649	40.799	50.7759	60.6058	70.7157	80.7099	90.7593	100.736
889	22.76	10.5651	20.515	30.7745	40.7936	50.8637	60.6868	70.8098	80.7228	90.7099	100.709
890	22.78	10.515	20.4478	30.7341	40.7827	50.7356	60.6926	70.7635	80.7398	90.8124	100.669
891	22.8	10.4495	20.5411	30.7114	40.8004	50.7977	60.7214	70.7496	80.6795	90.7398	100.804
892	22.82	10.5018	20.5443	30.7538	40.888	50.7621	60.7228	70.769	80.7566	90.7895	100.775
893	22.84	10.5571	20.5683	30.6926	40.799	50.8004	60.7579	70.8204	80.6853	90.7566	100.818
894	22.86	10.4529	20.5571	30.7228	40.8271	50.8956	60.7468	70.7056	80.6454	90.744	100.707
895	22.88	10.5167	20.5903	30.7814	40.7773	50.8244	60.6868	70.7963	80.7114	90.8337	100.748
896	22.9	10.5035	20.5281	30.7398	40.7841	50.7814	60.6333	70.7759	80.7538	90.7042	100.669
897	22.92	10.5249	20.5539	30.8124	40.7731	50.7228	60.6135	70.8111	80.6318	90.7882	100.879
898	22.94	10.5651	20.5965	30.8727	40.8138	50.8057	60.6941	70.7868	80.6795	90.8098	100.726
899	22.96	10.4734	20.5183	30.7663	40.799	50.7909	60.7157	70.7356	80.6543	90.7676	100.745
900	22.98	10.5035	20.5314	30.7745	40.8918	50.8494	60.6439	70.7593	80.6588	90.7855	100.745
901	23	10.5539	20.5667	30.7384	40.8376	50.7786	60.6287	70.8017	80.6912	90.7922	100.759
902	23.02	10.4339	20.4868	30.7731	40.933	50.8416	60.7257	70.7663	80.6795	90.7635	100.714
903	23.04	10.4985	20.5232	30.8124	40.961	50.8098	60.7271	70.7786	80.7142	90.7963	100.796
904	23.06	10.5281	20.5762	30.8442	41.0084	50.8429	60.7496	70.7731	80.6853	90.831	100.819
905	23.08	10.4734	20.5809	30.8662	40.9452	50.8363	60.7607	70.8191	80.7313	90.9586	100.747
906	23.1	10.5298	20.6165	30.9094	41.0464	50.8481	60.697	70.8867	80.7042	90.9293	100.827
907	23.12	10.5183	20.5459	30.9256	41.1485	51.0143	60.8546	70.9391	80.7114	90.9379	100.792
908	23.14	10.515	20.6303	31.0143	41.2771	50.8994	60.7731	70.8494	80.7868	91.0578	100.88
909	23.16	10.5539	20.6393	31.0407	41.4538	50.9789	60.8585	70.9106	80.7786	91.0189	100.966
910	23.18	10.5507	20.5523	31.2046	41.6272	51.0258	60.7895	70.992	80.831	91.0934	101.059
911	23.2	10.6165	20.769	31.2298	41.9206	51.0623	60.8752	71.1011	80.8204	91.3508	101.146
912	23.22	10.5793	20.7468	31.4835	42.2693	51.1778	60.9873	71.0923	80.9231	91.4521	101.232
913	23.24	10.6439	20.8084	31.6962	42.6835	51.2742	61.0061	71.14	80.9766	91.6919	101.454
914	23.26	10.6135	20.8816	31.9567	42.8507	51.379	61.2487	71.3106	80.9884	91.9549	101.707
915	23.28	10.6242	20.9955	32.2882	42.864	51.5322	61.3808	71.5856	81.0131	92.2051	101.981
916	23.3	10.6984	21.2167	32.6112	42.7139	51.7663	61.573	71.8124	81.1943	92.496	102.361
917	23.32	10.7157	21.3691	32.8807	42.4679	52.0229	61.915	72.0934	81.4564	92.721	102.679
918	23.34	10.7909	21.6042	32.9724	42.2112	52.2718	62.2313	72.3443	81.7683	92.7855	102.894
919	23.36	10.9131	21.7814	32.8756	41.831	52.5399	62.4885	72.4529	82.039	92.7377	102.987
920	23.38	11.0258	22.0253	32.6019	41.5531	52.674	62.5758	72.5326	82.3006	92.4998	102.859
921	23.4	11.2288	22.1611	32.3952	41.3276	52.7341	62.5113	72.5204	82.3862	92.2805	102.553
922	23.42	11.5515	22.3581	32.0549	41.1747	52.6835	62.3087	72.3799	82.354	91.9724	102.299
923	23.44	11.8017	22.4721	31.732	41.1207	52.4889	62.1158	72.0802	82.1653	91.6536	101.904
924	23.46	12.2348	22.5289	31.3508	41.0026	52.2742	61.7943	71.8138	81.9379	91.3011	101.531
925	23.48	12.4864	22.4856	31.2378	41.0073	52.0241	61.4331	71.5109	81.6743	91.1913	101.273
926	23.5	12.6618	22.2781	31.0945	40.9706	51.6912	61.2086	71.3002	81.4076	91.0521	101.099
927	23.52	12.6154	22.0707	31.0779	40.944	51.4322	61.0084	71.1217	81.1131	91.0189	101.046
928	23.54	12.4208	21.7412	31.0084	40.8611	51.2781	60.9513	71.0362	81.043	91.0038	100.879
929	23.56	12.1585	21.4952	30.9391	40.8017	51.1432	60.8429	70.9476	80.865	90.9489	100.883
930	23.58	11.8727	21.2278	30.78	40.8031	51.1066	60.8031	70.9006	80.8867	90.8727	100.865
931	23.6	11.486	20.9967	30.8004	40.8559	50.9979	60.7718	70.8778	80.7827	90.8956	100.87
932	23.62	11.2178	20.8376	30.7663	40.8151	50.9766	60.8057	70.7963	80.7977	90.8084	100.769
933	23.64	10.9837	20.8455	30.7963	40.6984	50.9256	60.7649	70.831	80.6751	90.6528	100.769
934	23.66	10.8416	20.8218	30.7827	40.7313	50.8468	60.7027	70.7085	80.6543	90.7171	100.743
935	23.68	10.7731	20.7157	30.8204	40.7242	50.8559	60.6912	70.7909	80.7827	90.6633	100.72
936	23.7	10.7142	20.6227	30.7827	40.6941	50.7963	60.7242	70.8044	80.6868	90.744	100.682
937	23.72	10.6378	20.6027	30.874	40.6588	50.7827	60.6897	70.7085	80.6227	90.7085	100.669
938	23.74	10.5856	20.5298	30.7635	40.7099	50.799	60.6287	70.6721	80.6692	90.7356	100.601
939	23.76	10.4935	20.533	30.7341	40.7635	50.8598	60.769	70.751	80.6348	90.615	100.669
940	23.78	10.5523	20.5918	30.6736	40.8324	50.751	60.6499	70.7071	80.6333	90.744	100.693
941	23.8	10.5793	20.5523	30.7426	40.7071	50.7663	60.5981	70.7579	80.5699	90.6736	100.72
942	23.82	10.5346	20.5085	30.7271	40.7663	50.7242	60.6573	70.744	80.6751	90.6677	100.62
943	23.84	10.533	20.4784	30.7566	40.7341	50.7114	60.6378	70.5996	80.6647	90.7114	100.781
944	23.86	10.5523	20.4357	30.7496	40.7593	50.6707	60.5872	70.7285	80.5949	90.7157	100.662
945	23.88	10.5101	20.5134	30.7468	40.7398	50.7426	60.6883	70.7157	80.6348	90.7099	100.71
946	23.9	10.4852	20.5777	30.6883	40.7922	50.7718	60.6242	70.6721	80.5635	90.7566	100.62
947	23.92	10.4835	20.5018	30.6528	40.7663	50.6765	60.6242	70.6543	80.5981	90.6499	100.666
948	23.94	10.4546	20.4217	30.7099	40.678	50.7056	60.615	70.6104	80.6839	90.7114	100.633
949	23.96	10.4734	20.4985	30.6588	40.7607	50.6795	60.5872	70.6955	80.5825	90.6736	100.7
950	23.98	10.4885	20.5232	30.7299	40.744	50.7157	60.5918	70.6692	80.6104	90.6824	100.651
951	24	10.4005	20.533	30.7027	40.7566	50.6999	60.5762	70.6439	80.6333	90.6662	100.659
952	24.02	10.47	20.446	30.6853	40.7257	50.7071	60.5587	70.6499	80.6707	90.6318	100.623
953	24.04	10.4217	20.5298	30.7027	40.6853	50.7341	60.6272	70.6912	80.6027	90.6721	100.639
954	24.06	10.4357	20.4252	30.7313	40.6897	50.7157	60.6119	70.6824	80.5996	90.751	100.713
955	24.08	10.4784	20.4952	30.6765	40.7327	50.6765	60.5934	70.6707	80.6499	90.6677	100.642
956	24.1	10.515	20.5777	30.6393	40.6499	50.5825	60.5427	70.6868	80.6721	90.6499	100.648
957	24.12	10.5101	20.4041	30.6603	40.6469	50.6999	60.5314	70.6883	80.6707	90.6469	100.607
958	24.14	10.4409	20.5035	30.7185	40.6707	50.7398	60.5068	70.6941	80.6662	90.6588	100.606
959	24.16	10.4649	20.4041	30.6839	40.697	50.7468	60.6272	70.6897	80.4868	90.6662	100.668
960	24.18	10.4164	20.4767	30.6603	40.7299	50.7171	60.5887	70.7027	80.5777	90.6647	100.691
961	24.2	10.3916	20.4426	30.7099	40.72	50.678	60.5683	70.6303	80.5667	90.6633	100.694
962	24.22	10.4784	20.4164	30.6135	40.697	50.7185	60.6318	70.6073	80.6058	90.7042	100.568
963	24.24	10.4005	20.4287	30.7271	40.7593	50.7718	60.5872	70.6393	80.6287	90.6662	100.517
964	24.26	10.3952	20.4784	30.6573	40.6999	50.7341	60.4784	70.6378	80.6765	90.7085	100.575
965	24.28	10.4005	20.5002	30.6242	40.6926	50.7313	60.52	70.6393	80.5762	90.6883	100.63
966	24.3	10.3498	20.4235	30.6721	40.6227	50.6883	60.6227	70.6721	80.5619	90.6573	100.626
967	24.32	10.4632	20.4666	30.6795	40.6707	50.6809	60.5746	70.6104	80.6257	90.6272	100.549
968	24.34	10.42	20.5002	30.6824	40.6165	50.7271	60.5491	70.5949	80.6499	90.5619	100.669
969	24.36	10.32	20.4632	30.615	40.6042	50.6941	60.5746	70.5746	80.6303	90.6721	100.571
970	24.38	10.4818	20.4969	30.6257	40.6514	50.6868	60.5746	70.6012	80.6941	90.5699	100.586
971	24.4	10.3862	20.4818	30.72	40.6333	50.6603	60.6272	70.6089	80.6181	90.6868	100.642
972	24.42	10.4409	20.5051	30.6257	40.6165	50.737	60.5183	70.5903	80.5683	90.5183	100.592
973	24.44	10.4495	20.5216	30.6318	40.6181	50.6318	60.5443	70.6165	80.5793	90.5459	100.531
974	24.46	10.3934	20.4391	30.5965	40.6378	50.6454	60.5232	70.6227	80.4885	90.6135	100.557
975	24.48	10.4529	20.5395	30.6348	40.6333	50.6618	60.5362	70.6089	80.4952	90.5996	100.515
976	24.5	10.4717	20.4666	30.5683	40.678	50.697	60.5051	70.6135	80.4767	90.5667	100.612
977	24.52	10.2761	20.427	30.5777	40.6393	50.5934	60.5249	70.6721	80.4885	90.5667	100.549
978	24.54	10.4305	20.4868	30.6378	40.6528	50.5809	60.52	70.6058	80.5035	90.6012	100.629
979	24.56	10.32	20.4632	30.6135	40.6883	50.6573	60.5281	70.6721	80.4885	90.52	100.548
980	24.58	10.28	20.4683	30.6012	40.6318	50.5777	60.5395	70.6073	80.6135	90.6042	100.567
981	24.6	10.3106	20.4564	30.6073	40.7327	50.6181	60.5314	70.6227	80.5934	90.6348	100.564
982	24.62	10.4005	20.4076	30.7071	40.6573	50.5949	60.5167	70.5539	80.5571	90.6165	100.564
983	24.64	10.2954	20.4305	30.6272	40.6955	50.697	60.515	70.6883	80.5555	90.6242	100.597
984	24.66	10.4235	20.388	30.6227	40.6514	50.6824	60.5216	70.6272	80.5216	90.6196	100.567
985	24.68	10.4322	20.4339	30.6926	40.7299	50.6318	60.5362	70.5134	80.5167	90.5949	100.609
986	24.7	10.4235	20.446	30.6196	40.6765	50.6647	60.5475	70.5619	80.6181	90.5651	100.589
987	24.72	10.3754	20.4767	30.5918	40.6514	50.4852	60.5981	70.6318	80.6042	90.5491	100.52
988	24.74	10.3387	20.4885	30.5918	40.6736	50.7313	60.4717	70.5475	80.5249	90.6119	100.62
989	24.76	10.3443	20.427	30.6272	40.6211	50.6027	60.5183	70.615	80.6135	90.6393	100.575
990	24.78	10.3535	20.4969	30.5965	40.6484	50.6089	60.6227	70.5101	80.6027	90.5134	100.473
991	24.8	10.2761	20.3144	30.5362	40.5683	50.697	60.4751	70.5346	80.5346	90.6272	100.635
992	24.82	10.3406	20.3182	30.6181	40.5965	50.5683	60.4564	70.6469	80.5379	90.5167	100.687
993	24.84	10.3934	20.4852	30.6211	40.5507	50.5699	60.5314	70.6257	80.5918	90.5555	100.507
994	24.86	10.3068	20.4985	30.6393	40.5714	50.6543	60.533	70.5571	80.5167	90.5395	100.528
995	24.88	10.4495	20.4902	30.6469	40.5934	50.6104	60.5035	70.5699	80.573	90.6662	100.571
996	24.9	10.3645	20.4322	30.5635	40.6677	50.5635	60.5051	70.5475	80.5539	90.6089	100.541
997	24.92	10.3681	20.3952	30.7327	40.5872	50.6303	60.4784	70.5523	80.5491	90.5118	100.497
998	24.94	10.3862	20.3608	30.6603	40.6469	50.5949	60.5667	70.5539	80.4801	90.6135	100.556
999	24.96	10.3627	20.3862	30.5793	40.6454	50.5379	60.5777	70.6119	80.615	90.5777	100.463
1000	24.98	10.2973	20.4235	30.6603	40.6348	50.6809	60.4969	70.4409	80.5587	90.6333	100.492
1001	25	10.3219	20.348	30.6303	40.5443	50.5265	60.5002	70.5872	80.6058	90.6287	100.5
1002	25.02	10.3808	20.4952	30.5555	40.6955	50.5523	60.4615	70.6042	80.4564	90.5555	100.592
1003	25.04	10.4182	20.3608	30.5746	40.5714	50.5981	60.3772	70.6058	80.4868	90.5411	100.515
1004	25.06	10.3844	20.4094	30.6941	40.6543	50.6042	60.5167	70.5459	80.52	90.5507	100.404
1005	25.08	10.3163	20.446	30.5887	40.6211	50.6454	60.4985	70.5443	80.4478	90.5856	100.409
1006	25.1	10.3862	20.4546	30.6543	40.5777	50.4919	60.4801	70.5491	80.4801	90.5777	100.546
1007	25.12	10.2703	20.3387	30.6073	40.6348	50.5362	60.515	70.6868	80.47	90.5298	100.427
1008	25.14	10.3068	20.3535	30.5918	40.6558	50.5555	60.4919	70.6999	80.446	90.4835	100.512
1009	25.16	10.2308	20.4235	30.6765	40.7171	50.6363	60.5539	70.7468	80.4615	90.5411	100.556
1010	25.18	10.3608	20.3898	30.6287	40.6839	50.6042	60.533	70.6926	80.4059	90.6378	100.48
1011	25.2	10.3294	20.4041	30.6469	40.6211	50.6042	60.5507	70.6795	80.5459	90.6027	100.541
1012	25.22	10.3898	20.3406	30.5918	40.6528	50.5809	60.5018	70.6633	80.5459	90.5714	100.47
1013	25.24	10.4478	20.4076	30.6135	40.5587	50.5068	60.515	70.6333	80.5035	90.5699	100.513
1014	25.26	10.4059	20.3718	30.6408	40.5934	50.6181	60.5507	70.573	80.4818	90.4649	100.503
1015	25.28	10.3808	20.4235	30.4868	40.7013	50.5475	60.4252	70.6424	80.4374	90.4818	100.571
1016	25.3	10.3808	20.3663	30.5856	40.7384	50.533	60.4885	70.5777	80.397	90.5571	100.437
1017	25.32	10.3844	20.4041	30.515	40.6912	50.5249	60.4935	70.5491	80.37	90.573	100.487
1018	25.34	10.3572	20.4305	30.5777	40.7855	50.6272	60.4919	70.5459	80.397	90.5619	100.552
1019	25.36	10.3627	20.4023	30.573	40.8258	50.5918	60.5281	70.5714	80.4512	90.6196	100.51
1020	25.38	10.3898	20.3572	30.5825	40.8376	50.5996	60.446	70.5459	80.5249	90.615	100.456
1021	25.4	10.3461	20.4059	30.5265	40.7356	50.5491	60.4164	70.5825	80.4683	90.5183	100.592
1022	25.42	10.3627	20.4598	30.6135	40.6257	50.5651	60.4023	70.5362	80.4598	90.5298	100.536
1023	25.44	10.3916	20.3424	30.6839	40.6042	50.4985	60.4112	70.5981	80.4818	90.5265	100.568
1024	25.46	10.3554	20.3087	30.5395	40.5507	50.4357	60.446	70.5427	80.5427	90.5555	100.46
1025	25.48	10.3276	20.3681	30.4985	40.6941	50.4512	60.4985	70.5411	80.4868	90.6469	100.505
1026	25.5	10.2935	20.42	30.5362	40.6227	50.5101	60.5523	70.5475	80.4615	90.5825	100.565
1027	25.52	10.3443	20.3608	30.5459	40.6707	50.533	60.4784	70.5903	80.427	90.5314	100.463
1028	25.54	10.3144	20.3068	30.5918	40.5903	50.584	60.3387	70.5699	80.4666	90.5475	100.554
1029	25.56	10.2781	20.388	30.5281	40.6119	50.5085	60.5134	70.4615	80.4598	90.5346	100.483
1030	25.58	10.3554	20.3125	30.5085	40.615	50.533	60.4835	70.4902	80.5085	90.4512	100.485
1031	25.6	10.2781	20.3238	30.5587	40.5651	50.6181	60.4835	70.5555	80.4868	90.573	100.473
1032	25.62	10.3663	20.3826	30.4529	40.6514	50.5635	60.5635	70.5379	80.5571	90.5555	100.578
1033	25.64	10.379	20.32	30.52	40.6543	50.6012	60.4919	70.584	80.5459	90.4546	100.465
1034	25.66	10.2858	20.3772	30.5507	40.6499	50.5587	60.5216	70.5395	80.5314	90.4598	100.446
1035	25.68	10.3554	20.4409	30.615	40.6751	50.5427	60.4529	70.5265	80.4919	90.5949	100.483
1036	25.7	10.2248	20.3663	30.5714	40.7085	50.5085	60.4751	70.5459	80.4322	90.5395	100.508
1037	25.72	10.3313	20.3219	30.6058	40.6073	50.5667	60.4529	70.4717	80.4235	90.5265	100.554
1038	25.74	10.3313	20.3011	30.4751	40.5903	50.4852	60.4717	70.4322	80.4147	90.5746	100.478
1039	25.76	10.2625	20.28	30.5232	40.5281	50.5475	60.3952	70.5018	80.4094	90.5249	100.413
1040	25.78	10.3068	20.3049	30.4546	40.6181	50.5746	60.4023	70.4868	80.4784	90.4835	100.546
1041	25.8	10.2025	20.3313	30.6227	40.6618	50.4357	60.47	70.5887	80.5523	90.4581	100.463
1042	25.82	10.32	20.3257	30.5523	40.6181	50.5523	60.4784	70.5887	80.388	90.6058	100.436
1043	25.84	10.3987	20.3163	30.5362	40.5651	50.5714	60.4852	70.5085	80.4112	90.4529	100.576
1044	25.86	10.2467	20.2916	30.5068	40.6318	50.6073	60.4147	70.4818	80.4985	90.6073	100.465
1045	25.88	10.348	20.2858	30.5051	40.5118	50.5475	60.3987	70.6042	80.5314	90.3898	100.432
1046	25.9	10.3443	20.4287	30.5118	40.5793	50.5996	60.4252	70.4529	80.4478	90.4564	100.443
1047	25.92	10.3608	20.303	30.5651	40.5085	50.5872	60.4322	70.5762	80.5002	90.4751	100.526
1048	25.94	10.2507	20.3011	30.5068	40.5134	50.5085	60.4094	70.5249	80.5298	90.37	100.374
1049	25.96	10.397	20.3294	30.5491	40.5051	50.5523	60.4322	70.5555	80.4076	90.4868	100.468
1050	25.98	10.2761	20.3238	30.5746	40.5411	50.5571	60.4147	70.4546	80.4112	90.4322	100.472
1051	26	10.3608	20.3332	30.5714	40.4935	50.5265	60.446	70.4546	80.3898	90.5635	100.507
1052	26.02	10.2208	20.4129	30.5996	40.5249	50.4632	60.4041	70.5619	80.4801	90.5475	100.395
1053	26.04	10.2086	20.32	30.4598	40.5265	50.4182	60.4649	70.6042	80.4598	90.5002	100.453
1054	26.06	10.3332	20.3049	30.4952	40.5443	50.533	60.5555	70.6027	80.4529	90.4615	100.513
1055	26.08	10.2288	20.3608	30.5183	40.5281	50.4443	60.4023	70.4734	80.42	90.446	100.487
1056	26.1	10.2858	20.2819	30.5587	40.5249	50.5443	60.4322	70.5085	80.4005	90.4546	100.444
1057	26.12	10.2408	20.303	30.5346	40.4546	50.4666	60.37	70.4252	80.4529	90.4666	100.455
1058	26.14	10.2839	20.3645	30.5002	40.573	50.4546	60.4598	70.4322	80.4409	90.5346	100.432
1059	26.16	10.3068	20.2992	30.4666	40.4868	50.4182	60.5587	70.4409	80.3916	90.4935	100.427
1060	26.18	10.2703	20.3068	30.5379	40.5035	50.4734	60.52	70.4564	80.4322	90.4409	100.418
1061	26.2	10.2781	20.3182	30.5539	40.4426	50.5918	60.5427	70.4374	80.3772	90.4767	100.425
1062	26.22	10.3219	20.359	30.5395	40.4357	50.5507	60.4767	70.5167	80.4005	90.4767	100.461
1063	26.24	10.2916	20.32	30.4443	40.5395	50.5002	60.4235	70.4985	80.4885	90.3934	100.453
1064	26.26	10.348	20.3238	30.4649	40.4919	50.5183	60.4919	70.4683	80.3163	90.5002	100.517
1065	26.28	10.2896	20.3424	30.5118	40.4683	50.4374	60.5002	70.4935	80.3387	90.4164	100.489
1066	26.3	10.2348	20.3068	30.4751	40.4581	50.4784	60.4649	70.397	80.37	90.4129	100.458
1067	26.32	10.2722	20.3681	30.5002	40.5555	50.4935	60.37	70.4287	80.3424	90.4357	100.411
1068	26.34	10.2167	20.2742	30.5101	40.5085	50.5699	60.4666	70.4868	80.3627	90.5101	100.43
1069	26.36	10.2839	20.2368	30.4357	40.4339	50.4902	60.4339	70.4751	80.4666	90.4818	100.344
1070	26.38	10.1923	20.3011	30.4339	40.5619	50.4919	60.4717	70.3952	80.37	90.3572	100.379
1071	26.4	10.1033	20.3754	30.5265	40.5918	50.4443	60.4023	70.5002	80.4717	90.5346	100.422
1072	26.42	10.2248	20.2742	30.4598	40.4615	50.5118	60.4868	70.3627	80.4512	90.4512	100.436
1073	26.44	10.2288	20.3387	30.4767	40.5216	50.4969	60.4005	70.4164	80.3916	90.4581	100.388
1074	26.46	10.184	20.3068	30.4374	40.5281	50.3987	60.4235	70.4767	80.4112	90.4529	100.397
1075	26.48	10.3049	20.2586	30.4683	40.4581	50.4885	60.303	70.4005	80.32	90.5232	100.427
1076	26.5	10.3294	20.2208	30.4649	40.4835	50.5051	60.3934	70.4322	80.4426	90.5298	100.441
1077	26.52	10.2066	20.2858	30.4564	40.4632	50.4818	60.3517	70.4546	80.388	90.4868	100.384
1078	26.54	10.2566	20.2005	30.4767	40.4784	50.5981	60.3219	70.4217	80.3934	90.4734	100.43
1079	26.56	10.3219	20.2448	30.4252	40.4683	50.4322	60.4287	70.3987	80.4339	90.5825	100.461
1080	26.58	10.3572	20.2605	30.5746	40.4666	50.4217	60.3934	70.4852	80.4182	90.5035	100.395
1081	26.6	10.3461	20.3125	30.5068	40.5699	50.427	60.3257	70.4357	80.4287	90.4094	100.446
1082	26.62	10.1442	20.348	30.5216	40.573	50.5587	60.3332	70.4495	80.3498	90.4767	100.416
1083	26.64	10.1695	20.348	30.584	40.6119	50.5051	60.4734	70.4235	80.3406	90.4581	100.548
1084	26.66	10.2288	20.37	30.5035	40.515	50.5265	60.4059	70.4615	80.4164	90.5051	100.467
1085	26.68	10.2046	20.2935	30.5232	40.6242	50.5523	60.4512	70.4252	80.2722	90.4512	100.507
1086	26.7	10.2248	20.2839	30.5411	40.7056	50.5101	60.3844	70.4885	80.4129	90.5118	100.465
1087	26.72	10.2107	20.4059	30.5232	40.8598	50.5265	60.4059	70.4801	80.3772	90.5068	100.441
1088	26.74	10.3238	20.348	30.7607	40.7496	50.6795	60.4818	70.5134	80.4512	90.5809	100.492
1089	26.76	10.3952	20.397	30.6543	40.7242	50.5762	60.5571	70.52	80.4252	90.6272	100.548
1090	26.78	10.2428	20.4767	30.8429	40.7482	50.6119	60.5167	70.6633	80.4952	90.6242	100.707
1091	26.8	10.2147	20.4409	30.9694	40.8258	50.6135	60.5667	70.6287	80.4767	90.7214	100.769
1092	26.82	10.3443	20.3387	31.14	41.0544	50.8546	60.5491	70.7538	80.5981	90.7552	100.675
1093	26.84	10.3144	20.3627	31.3907	41.1695	50.8893	60.6707	70.7056	80.6318	90.8546	100.755
1094	26.86	10.3826	20.5002	31.5183	41.1726	50.9825	60.7538	70.8416	80.5507	90.9955	100.903
1095	26.88	10.3068	20.6042	31.5856	40.8842	51.0857	60.8714	70.8151	80.6736	91.0362	101.152
1096	26.9	10.3049	20.7579	31.5523	40.9044	51.2992	60.9658	70.9813	80.6912	91.0735	101.213
1097	26.92	10.3238	20.7607	31.3134	41.0521	51.3943	61.2713	71.0316	80.893	91.1077	101.358
1098	26.94	10.4391	20.8191	31.159	40.8765	51.486	61.2906	71.0967	80.9932	90.8611	101.215
1099	26.96	10.4835	20.9181	31.0701	40.7704	51.3961	61.0316	71.0189	81.0096	90.8752	101.038
1100	26.98	10.5949	20.9573	30.9305	40.7299	51.2674	60.9908	70.9305	81.0224	90.8429	100.951
1101	27	10.6809	21.0578	30.7566	40.7607	51.1378	60.893	70.7868	80.9169	90.7114	100.929
1102	27.02	10.8165	21.1325	30.7085	40.8803	50.9778	60.7882	70.7214	80.8324	90.4852	100.7
1103	27.04	11.0073	21.0555	30.6558	40.7786	50.8442	60.5996	70.6514	80.7773	90.5379	100.507
1104	27.06	11.1185	20.8714	30.6333	40.7566	50.6287	60.4717	70.615	80.6424	90.5118	100.458
1105	27.08	11.0634	20.7855	30.6348	40.7922	50.6514	60.4985	70.5555	80.5918	90.4666	100.468
1106	27.1	10.8918	20.6912	30.6795	40.6955	50.584	60.4426	70.5714	80.4581	90.5167	100.448
1107	27.12	10.7299	20.5746	30.6012	40.6999	50.6165	60.4969	70.3862	80.4564	90.5118	100.473
1108	27.14	10.751	20.5298	30.5683	40.6558	50.6104	60.6181	70.52	80.446	90.4784	100.505
1109	27.16	10.5085	20.4164	30.6227	40.6272	50.5587	60.5683	70.52	80.4147	90.4391	100.434
1110	27.18	10.4322	20.3916	30.5298	40.5918	50.4598	60.5459	70.4868	80.4512	90.4112	100.388
1111	27.2	10.3572	20.42	30.5395	40.5427	50.5443	60.5379	70.4495	80.4443	90.427	100.363
1112	27.22	10.4147	20.3934	30.573	40.5777	50.5002	60.4129	70.4147	80.4581	90.32	100.48
1113	27.24	10.3294	20.2208	30.4818	40.5856	50.4615	60.4546	70.4902	80.3294	90.3572	100.266
1114	27.26	10.28	20.3011	30.4801	40.4767	50.5298	60.388	70.4339	80.4952	90.3754	100.375
1115	27.28	10.3332	20.2781	30.5134	40.4649	50.4852	60.3718	70.3681	80.4717	90.4409	100.344
1116	27.3	10.2507	20.2973	30.4835	40.5856	50.4598	60.4529	70.4023	80.3535	90.4391	100.393
1117	27.32	10.2644	20.2428	30.5507	40.4717	50.5635	60.3424	70.3987	80.3461	90.4615	100.411
1118	27.34	10.2527	20.2703	30.5183	40.4581	50.5699	60.4632	70.4512	80.3535	90.4683	100.401
1119	27.36	10.2896	20.3572	30.5793	40.5167	50.5118	60.4935	70.4182	80.3313	90.3844	100.307
1120	27.38	10.1737	20.2586	30.5018	40.5746	50.4868	60.4683	70.4164	80.3443	90.4985	100.386
1121	27.4	10.1964	20.2308	30.4041	40.5762	50.4952	60.4059	70.5183	80.3257	90.4094	100.402
1122	27.42	10.1378	20.1485	30.5216	40.3934	50.4666	60.2586	70.4495	80.3754	90.4443	100.379
1123	27.44	10.1716	20.2722	30.4818	40.4339	50.4598	60.4339	70.4164	80.3182	90.4322	100.241
1124	27.46	10.2858	20.2046	30.3461	40.47	50.3736	60.3294	70.427	80.4023	90.3627	100.427
1125	27.48	10.2781	20.2527	30.4305	40.4683	50.446	60.3608	70.3934	80.2742	90.47	100.388
1126	27.5	10.184	20.1758	30.4005	40.427	50.4868	60.3535	70.4969	80.3087	90.4076	100.386
1127	27.52	10.1611	20.2605	30.5051	40.5183	50.4598	60.3163	70.47	80.348	90.4339	100.434
1128	27.54	10.2546	20.2288	30.4935	40.4443	50.3898	60.3987	70.4985	80.3535	90.359	100.451
1129	27.56	10.1943	20.1674	30.4112	40.4217	50.4529	60.3498	70.3387	80.2858	90.3736	100.329
1130	27.58	10.1964	20.2992	30.3663	40.5101	50.4529	60.3681	70.4357	80.4443	90.348	100.448
1131	27.6	10.2248	20.2248	30.4391	40.4339	50.4935	60.2388	70.4005	80.3554	90.3898	100.383
1132	27.62	10.1737	20.2248	30.3844	40.47	50.3443	60.2527	70.3163	80.3257	90.3294	100.379
1133	27.64	10.1778	20.2722	30.4305	40.4902	50.4835	60.3535	70.4041	80.3898	90.3987	100.473
1134	27.66	10.2408	20.1632	30.4041	40.5118	50.515	60.4443	70.4059	80.3987	90.3011	100.339
1135	27.68	10.1737	20.2328	30.4666	40.4632	50.4935	60.2448	70.3898	80.3572	90.3663	100.386
1136	27.7	10.2046	20.2288	30.4649	40.4391	50.5667	60.348	70.4409	80.2527	90.4005	100.461
1137	27.72	10.182	20.2368	30.4339	40.4076	50.4023	60.3238	70.4217	80.359	90.427	100.408
1138	27.74	10.1799	20.2046	30.3987	40.5183	50.4426	60.3862	70.3608	80.3049	90.397	100.346
1139	27.76	10.2066	20.2896	30.5475	40.5232	50.4615	60.42	70.3736	80.3498	90.3952	100.35
1140	27.78	10.2188	20.1421	30.515	40.3862	50.4835	60.4649	70.3443	80.3627	90.3387	100.27
1141	27.8	10.1758	20.2973	30.4919	40.4546	50.4734	60.4147	70.3826	80.32	90.3736	100.305
1142	27.82	10.2368	20.3049	30.4902	40.4374	50.5362	60.3276	70.4902	80.3332	90.47	100.432
1143	27.84	10.1923	20.2487	30.4952	40.4969	50.5265	60.3087	70.3862	80.4322	90.388	100.364
1144	27.86	10.1611	20.1778	30.4147	40.397	50.3844	60.3517	70.4129	80.397	90.4529	100.305
1145	27.88	10.1632	20.2664	30.4235	40.427	50.5068	60.4147	70.3663	80.3276	90.4632	100.357
1146	27.9	10.2066	20.1695	30.3219	40.4357	50.5314	60.2328	70.359	80.3424	90.3681	100.434
1147	27.92	10.159	20.0701	30.379	40.5265	50.5587	60.3163	70.3219	80.3313	90.4059	100.406
1148	27.94	10.182	20.14	30.397	40.3844	50.4546	60.37	70.3087	80.3535	90.2935	100.402
1149	27.96	10.1077	20.2527	30.5002	40.52	50.4985	60.3517	70.3144	80.2703	90.4217	100.335
1150	27.98	10.2167	20.2268	30.397	40.4305	50.4767	60.359	70.37	80.2448	90.388	100.395
1151	28	10.079	20.2448	30.3313	40.5051	50.3718	60.3987	70.3535	80.2722	90.4041	100.354
1152	28.02	10.2147	20.2107	30.3294	40.4952	50.4666	60.3718	70.3125	80.3517	90.4339	100.292
1153	28.04	10.2046	20.2388	30.4041	40.5085	50.4164	60.3144	70.3554	80.427	90.3826	100.328
1154	28.06	10.1923	20.1943	30.4801	40.4598	50.4023	60.3406	70.3608	80.2819	90.4374	100.458
1155	28.08	10.2487	20.2167	30.3898	40.5635	50.4666	60.3663	70.3826	80.2877	90.2761	100.384
1156	28.1	10.1271	20.2428	30.4357	40.5298	50.446	60.2742	70.3443	80.2448	90.3862	100.381
1157	28.12	10.1464	20.3106	30.4564	40.4801	50.5101	60.2742	70.2973	80.4287	90.4182	100.368
1158	28.14	10.1902	20.1653	30.4374	40.573	50.4784	60.2858	70.3257	80.3808	90.3517	100.32
1159	28.16	10.1421	20.2781	30.4632	40.4252	50.4094	60.3163	70.3387	80.2408	90.42	100.276
1160	28.18	10.112	20.2448	30.3554	40.4666	50.4357	60.3219	70.3952	80.3144	90.3808	100.354
1161	28.2	10.0835	20.2086	30.37	40.5167	50.3387	60.3934	70.3443	80.348	90.3219	100.297
1162	28.22	10.0923	20.2228	30.4164	40.4478	50.3718	60.2992	70.32	80.3387	90.3663	100.413
1163	28.24	10.2066	20.2288	30.4357	40.4985	50.3276	60.3387	70.4217	80.2916	90.3826	100.331
1164	28.26	10.2448	20.1882	30.4235	40.4683	50.379	60.3443	70.4182	80.2328	90.4666	100.286
1165	28.28	10.2388	20.2308	30.2858	40.397	50.3608	60.2954	70.3572	80.2408	90.3276	100.314
1166	28.3	10.1902	20.2625	30.37	40.4546	50.4023	60.2896	70.379	80.388	90.3645	100.32
1167	28.32	10.1506	20.2368	30.3663	40.397	50.3952	60.2935	70.2992	80.3663	90.4391	100.237
1168	28.34	10.1674	20.1485	30.4615	40.4512	50.3754	60.3011	70.2916	80.3011	90.3572	100.241
1169	28.36	10.2408	20.2388	30.4147	40.3987	50.4495	60.2268	70.3182	80.3106	90.47	100.198
1170	28.38	10.1984	20.2308	30.397	40.4094	50.4076	60.2566	70.3535	80.2188	90.348	100.311
1171	28.4	10.1695	20.1011	30.3313	40.3916	50.388	60.3387	70.3461	80.2167	90.4005	100.297
1172	28.42	10.1548	20.2066	30.3461	40.4767	50.397	60.335	70.3718	80.3276	90.3049	100.247
1173	28.44	10.1984	20.1923	30.3808	40.4426	50.4023	60.3645	70.388	80.3498	90.3011	100.372
1174	28.46	10.1695	20.1964	30.3424	40.4217	50.4217	60.2487	70.3754	80.2467	90.2781	100.318
1175	28.48	10.2722	20.303	30.4322	40.3681	50.3934	60.2935	70.3826	80.3535	90.3608	100.329
1176	28.5	10.1548	20.2127	30.3916	40.3898	50.3645	60.2973	70.3498	80.3406	90.3498	100.282
1177	28.52	10.0701	20.2147	30.4164	40.5035	50.4287	60.2722	70.3808	80.3645	90.4147	100.352
1178	28.54	10.1011	20.32	30.3736	40.5002	50.3443	60.2683	70.4129	80.2288	90.4252	100.305
1179	28.56	10.1695	20.1778	30.427	40.5619	50.4339	60.3011	70.397	80.3106	90.3718	100.461
1180	28.58	10.184	20.2742	30.3826	40.6528	50.4564	60.303	70.3754	80.348	90.3934	100.401
1181	28.6	10.2066	20.3461	30.4598	40.7814	50.4615	60.2566	70.5085	80.348	90.4443	100.375
1182	28.62	10.2487	20.1943	30.5232	40.8416	50.4076	60.3125	70.4147	80.28	90.5101	100.478
1183	28.64	10.1548	20.2625	30.4615	40.7827	50.4129	60.4059	70.4632	80.3443	90.5249	100.468
1184	28.66	10.1077	20.3219	30.5981	40.8337	50.5134	60.4683	70.446	80.3554	90.6454	100.573
1185	28.68	10.2127	20.2208	30.6662	40.7313	50.5101	60.4391	70.4717	80.3276	90.5362	100.606
1186	28.7	10.1442	20.2992	30.7071	40.7841	50.5777	60.5167	70.5216	80.4391	90.6543	100.656
1187	28.72	10.3068	20.3294	30.7384	40.8389	50.5459	60.4885	70.5746	80.4023	90.6662	100.721
1188	28.74	10.2025	20.2935	30.7185	40.8284	50.6765	60.5249	70.5459	80.4818	90.6912	100.684
1189	28.76	10.2288	20.3826	30.7773	40.8585	50.6588	60.5981	70.5699	80.4235	90.6135	100.687
1190	28.78	10.2546	20.4252	30.6824	40.7228	50.6363	60.5714	70.6439	80.4512	90.615	100.736
1191	28.8	10.3572	20.4885	30.8481	40.9044	50.6469	60.5918	70.5934	80.4985	90.6378	100.698
1192	28.82	10.3144	20.5298	30.6765	40.8637	50.6196	60.5507	70.6165	80.5395	90.6104	100.63
1193	28.84	10.4443	20.533	30.6721	40.7731	50.6765	60.5362	70.5949	80.6058	90.6378	100.663
1194	28.86	10.4391	20.5635	30.7621	40.744	50.6378	60.5507	70.5996	80.4852	90.6303	100.684
1195	28.88	10.4357	20.5216	30.7242	40.8481	50.6955	60.6528	70.6242	80.4287	90.6984	100.662
1196	28.9	10.4598	20.4784	30.7142	40.8337	50.6573	60.6165	70.6363	80.5134	90.6242	100.693
1197	28.92	10.3517	20.533	30.7214	40.7635	50.6528	60.4784	70.5793	80.5362	90.6119	100.665
1198	28.94	10.4649	20.5035	30.7704	40.8559	50.6424	60.5965	70.6272	80.4478	90.6454	100.668
1199	28.96	10.42	20.5085	30.744	40.874	50.7085	60.6499	70.5965	80.4495	90.7071	100.675
1200	28.98	10.5118	20.5035	30.7412	40.8918	50.7299	60.6363	70.5981	80.446	90.6573	100.604
1201	29	10.4902	20.4717	30.7566	40.8165	50.678	60.6439	70.5903	80.5085	90.6941	100.621
1202	29.02	10.4005	20.5667	30.7271	40.8829	50.7299	60.7228	70.6558	80.4801	90.6165	100.678
1203	29.04	10.6058	20.5265	30.7882	40.8688	50.7228	60.6348	70.6514	80.4868	90.6926	100.629
1204	29.06	10.5002	20.5118	30.8031	40.8842	50.7114	60.7356	70.6012	80.5232	90.7085	100.674
1205	29.08	10.4683	20.5427	30.8363	40.8867	50.7593	60.7827	70.6588	80.4935	90.6926	100.772
1206	29.1	10.5018	20.4969	30.8701	40.893	50.6912	60.7855	70.6135	80.3862	90.6303	100.656
1207	29.12	10.4717	20.5683	30.8004	40.8956	50.7552	60.7663	70.6408	80.5523	90.7099	100.761
1208	29.14	10.5035	20.5362	30.8138	40.8585	50.8714	60.678	70.6824	80.5051	90.7398	100.685
1209	29.16	10.4564	20.5903	30.8258	40.9525	50.7663	60.7327	70.6042	80.4357	90.7454	100.72
1210	29.18	10.5101	20.5232	30.8778	40.9694	50.8389	60.6242	70.6242	80.446	90.7649	100.745
1211	29.2	10.4717	20.5571	30.8765	41.0119	50.7895	60.751	70.6677	80.52	90.8031	100.781
1212	29.22	10.4182	20.5746	30.8559	41.0407	50.8701	60.8004	70.7621	80.5362	90.8559	100.792
1213	29.24	10.5411	20.5777	30.8994	41.184	50.8893	60.7579	70.7257	80.4683	90.8559	100.819
1214	29.26	10.5651	20.5427	30.9006	41.1882	50.9742	60.7356	70.7773	80.5825	90.7635	100.866
1215	29.28	10.5507	20.6363	31.0634	41.3238	50.8662	60.8442	70.7271	80.5856	90.8507	100.93
1216	29.3	10.5314	20.5746	31.0757	41.4452	50.9452	60.8803	70.8098	80.615	91.0096	100.954
1217	29.32	10.5539	20.6707	31.0824	41.5265	51.0038	60.8481	70.8943	80.6618	91.1228	100.938
1218	29.34	10.6058	20.6707	31.1851	41.7071	50.9873	60.9415	70.944	80.7327	91.1726	101.029
1219	29.36	10.6424	20.6363	31.3285	41.9495	51.0679	60.9908	70.9366	80.6528	91.2683	101.102
1220	29.38	10.6543	20.7579	31.4278	42.1758	51.1747	61.0645	71.1142	80.8004	91.3952	101.223
1221	29.4	10.5949	20.7922	31.5579	42.3475	51.3011	61.1716	71.1632	80.7621	91.5483	101.412
1222	29.42	10.7228	20.9019	31.7398	42.5907	51.3322	61.2925	71.2992	80.8572	91.7171	101.575
1223	29.44	10.7731	20.9464	31.9212	42.7987	51.5027	61.5754	71.5403	80.992	91.8291	101.753
1224	29.46	10.7468	21.1485	32.1569	43.058	51.6714	61.6135	71.6618	81.079	92.0258	101.901
1225	29.48	10.7552	21.2487	32.3722	43.3738	51.8071	61.8474	71.8158	81.2925	92.2834	102.124
1226	29.5	10.8468	21.3808	32.5856	43.7142	52.0538	62.0148	71.9592	81.4504	92.5155	102.337
1227	29.52	10.9537	21.5683	32.8307	44.1813	52.2423	62.1928	72.2398	81.5659	92.7506	102.513
1228	29.54	10.9896	21.737	33.0951	44.7948	52.4335	62.4186	72.4318	81.8051	93.1196	102.851
1229	29.56	11.1674	21.9249	33.4471	45.5032	52.6824	62.6146	72.7228	81.9985	93.4789	103.198
1230	29.58	11.3581	22.1658	33.8714	46.1629	52.9479	62.8899	72.9792	82.2233	93.9259	103.677
1231	29.6	11.5451	22.4151	34.3611	46.6356	53.2502	63.2744	73.4025	82.4619	94.4466	104.113
1232	29.62	11.7334	22.7621	34.9025	46.7533	53.6605	63.8022	73.8452	82.6476	94.9598	104.702
1233	29.64	11.9748	23.1923	35.4006	46.4183	54.0466	64.4516	74.4015	83.0148	95.4083	105.302
1234	29.66	12.1732	23.6037	35.8325	46.1039	54.523	64.9267	74.9277	83.4467	95.7601	105.852
1235	29.68	12.4555	24.0736	36.1621	46.0535	54.9768	65.2525	75.3611	84.0466	95.9573	106.174
1236	29.7	12.7513	24.546	36.2412	45.8191	55.3655	65.7023	75.6971	84.6559	95.9978	106.306
1237	29.72	13.1125	24.9558	36.1296	45.1625	55.6581	65.9703	75.9293	85.182	95.8276	106.23
1238	29.74	13.5113	25.184	35.8663	44.4822	55.8635	66.058	75.8879	85.4973	95.5769	105.983
1239	29.76	13.9945	25.4838	35.6114	43.9543	55.8935	65.8813	75.6886	85.5389	95.306	105.676
1240	29.78	14.5511	25.7348	35.3518	43.5344	55.7886	65.5926	75.4614	85.3937	94.9953	105.419
1241	29.8	15.122	25.9152	34.9281	43.1853	55.5774	65.3066	75.209	85.14	94.5229	105.02
1242	29.82	15.6293	25.9152	34.3209	42.9128	55.3585	65.0534	74.8101	84.9202	93.9464	104.412
1243	29.84	15.9029	25.7734	33.7194	42.6999	55.0831	64.6071	74.3318	84.6603	93.4092	103.737
1244	29.86	15.9117	25.5184	33.2564	42.4036	54.7066	63.9739	73.788	84.1777	92.976	103.203
1245	29.88	15.7161	25.2212	32.9531	42.1758	54.2407	63.3889	73.2338	83.5298	92.6736	102.916
1246	29.9	15.5116	24.8793	32.6828	41.9579	53.7987	62.9376	72.8579	82.9709	92.4138	102.618
1247	29.92	15.2934	24.4931	32.4555	41.7956	53.3808	62.639	72.5766	82.5483	92.2313	102.382
1248	29.94	14.976	23.9551	32.1747	41.577	53.0654	62.3466	72.3531	82.2453	91.9119	102.108
1249	29.96	14.4933	23.3869	32.0026	41.3952	52.7253	62.1293	72.1548	82.0218	91.7593	101.938
1250	29.98	13.8866	22.9135	31.7683	41.3106	52.4478	61.9354	71.915	81.7861	91.5817	101.665
1251	30	13.3615	22.5922	31.5579	41.3153	52.2183	61.7454	71.6484	81.6004	91.4278	101.455
1252	30.02	12.9231	22.3452	31.4443	41.2358	52.0189	61.5167	71.5273	81.3294	91.2248	101.32
1253	30.04	12.6135	22.027	31.3535	41.1892	51.7827	61.3182	71.3266	81.2238	91.1196	101.211
1254	30.06	12.359	21.8198	31.3182	41.089	51.6127	61.1632	71.1282	81.0544	91.0679	101.142
1255	30.08	12.0824	21.5973	31.1643	41.1527	51.4504	61.0373	71.0735	80.9825	91.0645	101.006
1256	30.1	11.833	21.4067	31.0768	41.043	51.3332	61.0096	70.9825	80.8943	90.9231	100.985
1257	30.12	11.6165	21.2556	31.0498	41.0026	51.2318	60.9069	70.9206	80.799	90.8662	100.957
1258	30.14	11.3781	21.0487	31.0362	40.973	51.2056	60.8494	70.8816	80.6454	90.8585	100.853
1259	30.16	11.279	20.9718	30.9742	40.8403	51.0945	60.8151	70.7963	80.7285	90.8084	100.869
1260	30.18	11.0757	20.8662	30.933	40.8943	51.0026	60.8611	70.7607	80.7482	90.8244	100.836
1261	30.2	11.0419	20.7841	30.8429	40.8004	51.0002	60.7538	70.7313	80.7013	90.7814	100.838
1262	30.22	10.9403	20.7242	30.8389	40.8416	50.9403	60.6751	70.7128	80.6662	90.7171	100.784
1263	30.24	10.7635	20.6751	30.8363	40.8481	50.9094	60.6439	70.7214	80.5346	90.6765	100.678
1264	30.26	10.7704	20.6439	30.795	40.8376	50.8244	60.6692	70.6211	80.5411	90.6165	100.65
1265	30.28	10.7635	20.7114	30.6809	40.7128	50.7936	60.6662	70.6424	80.5216	90.6558	100.691
1266	30.3	10.7185	20.5903	30.6926	40.7552	50.8791	60.5856	70.584	80.573	90.5298	100.671
1267	30.32	10.6999	20.5362	30.6926	40.7157	50.795	60.615	70.6196	80.4252	90.6736	100.7
1268	30.34	10.6042	20.5699	30.6439	40.6883	50.7257	60.5887	70.6469	80.5101	90.5555	100.684
1269	30.36	10.6089	20.5949	30.7042	40.6618	50.744	60.6073	70.5996	80.4801	90.5887	100.63
1270	30.38	10.5491	20.4919	30.7242	40.6089	50.7099	60.5216	70.5298	80.397	90.5134	100.638
1271	30.4	10.47	20.5746	30.6868	40.6618	50.6912	60.4581	70.5507	80.4059	90.5101	100.549
1272	30.42	10.4409	20.4734	30.6439	40.6999	50.7214	60.5475	70.5314	80.3718	90.5362	100.523
1273	30.44	10.4495	20.4391	30.7185	40.6227	50.6089	60.4235	70.5523	80.4094	90.4818	100.559
1274	30.46	10.5249	20.4164	30.6839	40.584	50.737	60.4598	70.5651	80.4059	90.5934	100.483
1275	30.48	10.4598	20.4164	30.6272	40.5249	50.5887	60.4985	70.5232	80.4112	90.5101	100.548
1276	30.5	10.4339	20.4666	30.615	40.6348	50.5651	60.4885	70.4919	80.3627	90.4885	100.548
1277	30.52	10.4217	20.348	30.6839	40.5699	50.6543	60.5395	70.4615	80.4305	90.5068	100.571
1278	30.54	10.4112	20.3332	30.5249	40.6543	50.6751	60.4305	70.4767	80.3772	90.4683	100.576
1279	30.56	10.3554	20.3182	30.533	40.7071	50.5085	60.3808	70.5183	80.3754	90.5068	100.443
1280	30.58	10.4094	20.3313	30.6012	40.533	50.5683	60.4495	70.4005	80.2586	90.4164	100.523
1281	30.6	10.3106	20.397	30.4818	40.5949	50.5085	60.3663	70.4164	80.3987	90.4147	100.513
1282	30.62	10.379	20.3862	30.6272	40.5683	50.5216	60.4235	70.4649	80.3772	90.4751	100.48
1283	30.64	10.3238	20.3535	30.5427	40.5395	50.72	60.3461	70.3898	80.2877	90.4581	100.523
1284	30.66	10.2916	20.2877	30.5346	40.4632	50.6104	60.4391	70.4666	80.3313	90.4734	100.528
1285	30.68	10.3736	20.3011	30.5651	40.5777	50.5101	60.3862	70.3663	80.4112	90.42	100.487
1286	30.7	10.3106	20.3772	30.5085	40.4615	50.5475	60.397	70.4885	80.47	90.4564	100.444
1287	30.72	10.3681	20.3144	30.584	40.6318	50.5249	60.3844	70.5085	80.4235	90.4426	100.413
1288	30.74	10.3808	20.2839	30.4734	40.6165	50.6089	60.3645	70.3772	80.348	90.379	100.48
1289	30.76	10.2877	20.2664	30.4985	40.5491	50.5249	60.3498	70.3952	80.3844	90.3163	100.567
1290	30.78	10.3572	20.3257	30.5918	40.515	50.6104	60.3387	70.4217	80.379	90.3826	100.467
1291	30.8	10.1632	20.2839	30.5918	40.446	50.5714	60.4339	70.3718	80.3049	90.3826	100.416
1292	30.82	10.3011	20.2722	30.5887	40.4751	50.6227	60.4322	70.359	80.3681	90.4868	100.416
1293	30.84	10.2992	20.2877	30.5018	40.5714	50.5346	60.3808	70.3049	80.2605	90.4632	100.249
1294	30.86	10.2625	20.2819	30.5491	40.4581	50.5265	60.348	70.3461	80.3049	90.4005	100.401
1295	30.88	10.2467	20.3144	30.6348	40.5216	50.5232	60.37	70.3608	80.2408	90.3987	100.408
1296	30.9	10.184	20.2605	30.6999	40.5183	50.6408	60.3898	70.3987	80.4581	90.4182	100.374
1297	30.92	10.2448	20.32	30.8442	40.5809	50.6363	60.4217	70.427	80.3934	90.5051	100.42
1298	30.94	10.2388	20.3144	31.0453	40.5523	50.8572	60.3627	70.4164	80.3844	90.3987	100.492
1299	30.96	10.2761	20.2819	31.2348	40.5167	50.8778	60.2858	70.3608	80.4801	90.3406	100.299
1300	30.98	10.2954	20.2448	31.3049	40.4443	51.0096	60.3772	70.379	80.4751	90.4041	100.372
1301	31	10.2348	20.3182	31.3125	40.397	51.1207	60.47	70.2742	80.6318	90.5101	100.397
1302	31.02	10.2973	20.1758	31.1674	40.4305	51.2858	60.4322	70.3313	80.8701	90.6027	100.307
1303	31.04	10.2664	20.2644	31.1871	40.5101	51.3572	60.4666	70.4478	80.9825	90.5002	100.352
1304	31.06	10.2586	20.3257	31.2188	40.5651	51.4287	60.42	70.3736	81.0339	90.5965	100.27
1305	31.08	10.2973	20.1632	31.0923	40.4683	51.3544	60.5085	70.3572	81.14	90.6897	100.383
1306	31.1	10.1163	20.2605	30.9658	40.4322	51.3313	60.4952	70.3934	81.1495	90.7128	100.377
1307	31.12	10.2586	20.2348	30.8943	40.4801	51.2086	60.4767	70.3443	81.2258	90.6378	100.37
1308	31.14	10.2228	20.2527	30.8893	40.4529	51.1995	60.397	70.3498	81.1995	90.6042	100.377
1309	31.16	10.2348	20.2348	30.8468	40.4751	51.0824	60.4322	70.3498	81.1033	90.5981	100.375
1310	31.18	10.2328	20.2308	30.8017	40.4252	50.9979	60.4478	70.3182	81.1706	90.6528	100.282
1311	31.2	10.2107	20.2742	30.7759	40.4287	50.9766	60.397	70.3952	81.2278	90.5714	100.366
1312	31.22	10.1653	20.3276	30.7607	40.4339	50.8494	60.2877	70.388	81.2147	90.4767	100.48
1313	31.24	10.1653	20.3011	30.737	40.4952	50.6408	60.3554	70.3406	81.0835	90.4305	100.293
1314	31.26	10.1902	20.3011	30.6333	40.47	50.6736	60.3276	70.303	81.0544	90.5002	100.404
1315	31.28	10.1861	20.1228	30.4935	40.4217	50.6257	60.4005	70.3736	81.0014	90.4801	100.297
1316	31.3	10.2005	20.2546	30.4902	40.446	50.6333	60.3844	70.3826	80.9243	90.4287	100.354
1317	31.32	10.2086	20.303	30.5491	40.4683	50.5587	60.2188	70.2742	80.8854	90.388	100.301
1318	31.34	10.2625	20.182	30.5362	40.4235	50.5714	60.2328	70.3718	80.7827	90.3238	100.301
1319	31.36	10.1569	20.1758	30.397	40.4164	50.4818	60.2308	70.3718	80.6809	90.3934	100.406
1320	31.38	10.2992	20.1716	30.4426	40.5232	50.5018	60.3313	70.359	80.5809	90.4005	100.383
1321	31.4	10.2487	20.2308	30.4632	40.4598	50.5068	60.3387	70.3572	80.5587	90.3238	100.293
1322	31.42	10.2388	20.1674	30.5746	40.5085	50.4322	60.2877	70.348	80.4129	90.2448	100.288
1323	31.44	10.2683	20.2086	30.5002	40.4529	50.4182	60.2546	70.2742	80.4059	90.3238	100.32
1324	31.46	10.1674	20.2722	30.446	40.5085	50.4885	60.3219	70.3681	80.3645	90.3443	100.399
1325	31.48	10.1695	20.2025	30.4409	40.7157	50.4581	60.3627	70.303	80.3736	90.3182	100.388
1326	31.5	10.1378	20.1716	30.4357	40.6165	50.4495	60.2408	70.3257	80.3443	90.3844	100.397
1327	31.52	10.1861	20.2046	30.4784	40.5587	50.397	60.2188	70.3808	80.303	90.3627	100.333
1328	31.54	10.112	20.2066	30.6058	40.6883	50.4443	60.2896	70.446	80.3219	90.3663	100.364
1329	31.56	10.2467	20.184	30.5068	40.8455	50.5018	60.4495	70.3313	80.3049	90.446	100.439
1330	31.58	10.2025	20.2566	30.5298	40.9305	50.42	60.32	70.3754	80.3087	90.4443	100.467
1331	31.6	10.182	20.2228	30.4935	41.2693	50.5002	60.3517	70.4147	80.388	90.5714	100.463
1332	31.62	10.1548	20.2625	30.7099	41.3489	50.5934	60.4409	70.4767	80.335	90.7185	100.533
1333	31.64	10.2877	20.3182	30.7426	41.4674	50.5651	60.4041	70.4919	80.3627	90.8585	100.659
1334	31.66	10.2288	20.2973	30.9646	41.5395	50.72	60.515	70.5101	80.3535	90.9634	100.827
1335	31.68	10.1861	20.3068	31.0049	41.3654	50.6692	60.6058	70.6514	80.4374	91.1368	101.037
1336	31.7	10.1902	20.4495	31.1902	41.2467	50.795	60.7579	70.8111	80.4985	91.2722	101.121
1337	31.72	10.3238	20.5887	31.2664	41.2107	50.9428	60.9586	70.9549	80.5903	91.3341	101.301
1338	31.74	10.3257	20.5872	31.32	40.9979	51.0679	61.0611	71.0293	80.8004	91.2887	101.42
1339	31.76	10.4409	20.7482	31.2278	40.8765	51.1882	61.141	71.1131	80.9586	91.2408	101.358
1340	31.78	10.5714	20.9031	31.1861	40.7341	51.2338	61.1882	71.1527	81.089	91.1109	101.173
1341	31.8	10.5918	20.9955	31.0084	40.6824	51.2992	61.1485	71.0578	81.069	91.0813	101.041
1342	31.82	10.6736	21.0846	30.9586	40.5903	51.2497	60.9991	70.9658	80.9766	90.8765	101.048
1343	31.84	10.9813	21.183	30.874	40.5443	51.2674	60.9144	70.888	80.8803	90.6692	100.848
1344	31.86	11.1517	21.0901	30.7579	40.4801	51.0945	60.8429	70.8098	80.8151	90.5183	100.669
1345	31.88	11.2076	20.9967	30.6042	40.4649	51.0049	60.6809	70.6303	80.751	90.52	100.571
1346	31.9	11.2398	20.9206	30.5459	40.4252	50.8494	60.5903	70.5777	80.6027	90.4426	100.502
1347	31.92	11.0956	20.7922	30.4478	40.5314	50.78	60.4985	70.3608	80.47	90.3049	100.43
1348	31.94	10.9932	20.7384	30.3862	40.3294	50.7412	60.3663	70.359	80.4059	90.303	100.355
1349	31.96	10.8688	20.5411	30.3663	40.3916	50.533	60.3754	70.3898	80.4041	90.3826	100.346
1350	31.98	10.7868	20.4322	30.3535	40.3125	50.47	60.4059	70.359	80.2268	90.3443	100.274
1351	32	10.7157	20.3144	30.3952	40.4112	50.4322	60.3663	70.2625	80.1674	90.2683	100.388
1352	32.02	10.4391	20.2448	30.3461	40.3517	50.4495	60.1861	70.28	80.2644	90.2819	100.305
1353	32.04	10.3916	20.1695	30.3718	40.3087	50.3898	60.2507	70.2954	80.2742	90.2566	100.215
1354	32.06	10.2566	20.2487	30.3663	40.3424	50.3049	60.2703	70.2954	80.182	90.2228	100.274
1355	32.08	10.2368	20.1485	30.359	40.3276	50.3332	60.1943	70.14	80.2288	90.1421	100.293
1356	32.1	10.1674	20.1861	30.2388	40.3517	50.4129	60.3332	70.2228	80.2188	90.2248	100.18
1357	32.12	10.2408	20.1882	30.3754	40.2428	50.3443	60.1984	70.1923	80.1163	90.2992	100.225
1358	32.14	10.1882	20.1378	30.2935	40.3443	50.2586	60.1716	70.2208	80.1716	90.2703	100.264
1359	32.16	10.159	20.1357	30.2664	40.2742	50.2527	60.1902	70.2208	80.1485	90.0813	100.255
1360	32.18	10.1716	20.1674	30.2487	40.37	50.2188	60.1548	70.2288	80.0768	90.184	100.251
1361	32.2	10.2066	20.1271	30.2566	40.3916	50.3754	60.2147	70.1314	80.125	90.303	100.243
1362	32.22	10.0385	20.0201	30.2566	40.3443	50.335	60.0544	70.2248	80.1421	90.1442	100.266
1363	32.24	10.2228	20.1163	30.3627	40.3772	50.3608	60.2527	70.2086	80.14	90.1653	100.322
1364	32.26	10.1271	20.1611	30.2877	40.3952	50.335	60.1695	70.1442	80.0724	90.2428	100.207
1365	32.28	9.99199	20.1442	30.3461	40.3934	50.2839	60.1011	70.2973	80.1695	90.1674	100.251
1366	32.3	10.0835	20.112	30.2664	40.4581	50.3406	60.14	70.3424	80.0611	90.2208	100.2
1367	32.32	10.0453	20.1163	30.2208	40.3808	50.1527	60.2268	70.2268	80.2208	90.159	100.288
1368	32.34	10.0061	20.0768	30.3517	40.3862	50.2428	60.1758	70.2046	80.1098	90.2388	100.235
1369	32.36	10.1055	20.1055	30.2546	40.3554	50.2147	60.1632	70.28	80.1653	90.1314	100.249
1370	32.38	10.0362	20.14	30.2388	40.3517	50.2625	60.1882	70.3163	80.1033	90.2107	100.198
1371	32.4	10.0679	20.1799	30.2467	40.3144	50.2896	60.1314	70.3144	80.1011	90.1271	100.159
1372	32.42	10.1548	20.1185	30.2527	40.2147	50.3087	60.2228	70.3663	80.2328	90.2147	100.225
1373	32.44	9.94885	20.2248	30.1943	40.3387	50.2167	60.2368	70.1548	80.1506	90.2328	100.213
1374	32.46	9.95613	20.0611	30.2188	40.3461	50.1799	60.1506	70.1293	80.1163	90.182	100.264
1375	32.48	10.0038	20.1737	30.1485	40.2566	50.3219	60.1421	70.2428	80.0879	90.2683	100.249
1376	32.5	10.0768	20.1611	30.2546	40.3163	50.3313	60.1506	70.2127	80.0724	90.1923	100.2
1377	32.52	10.14	20.0634	30.2288	40.184	50.2507	60.0989	70.1357	80.0923	90.2127	100.231
1378	32.54	10.0544	20.1527	30.303	40.2167	50.1314	60.0498	70.2228	80.0835	90.2248	100.233
1379	32.56	10.1758	19.992	30.2348	40.2839	50.2448	60.1163	70.2781	80.0589	90.1442	100.127
1380	32.58	10.1185	20.0498	30.1861	40.1902	50.2605	60.1336	70.2683	80.1033	90.1674	100.176
1381	32.6	10.0224	20.1611	30.2066	40.2761	50.2328	60.1943	70.2935	80.0679	90.159	100.174
1382	32.62	10.027	20.079	30.2388	40.2388	50.2388	60.0768	70.182	80.1185	90.1336	100.229
1383	32.64	10.1207	19.9489	30.1737	40.2368	50.2644	60.0835	70.1314	80.1011	90.1548	100.088
1384	32.66	10.0224	20.0084	30.1882	40.2546	50.1923	60.1357	70.1011	80.0247	90.2025	100.165
1385	32.68	10.0813	19.9317	30.1271	40.1653	50.1357	60.1421	70.2683	80.0901	90.2781	100.182
1386	32.7	10.0084	20.0177	30.2858	40.2428	50.1695	60.182	70.1033	80.1632	90.2046	100.203
1387	32.72	9.99199	20.0407	30.1314	40.182	50.1548	60.2167	70.1569	80.0131	90.2127	100.072
1388	32.74	10.1011	19.9991	30.2328	40.1943	50.2046	60.1185	70.1033	80.1506	90.1737	100.257
1389	32.76	10.0589	20.0316	30.2328	40.1964	50.0679	60.0247	70.1569	80.1737	90.0967	100.119
1390	32.78	10.0247	19.9658	30.1799	40.1984	50.2288	60.1163	70.0989	80.0589	90.1548	100.174
1391	32.8	10.027	20.0901	30.1902	40.2781	50.2408	60.1098	70.0679	80.1033	90.1548	100.027
1392	32.82	10.0316	19.9967	30.1228	40.2428	50.14	60.1861	70.1357	80.0679	90.1442	100.119
1393	32.84	10.0038	20.0476	30.1548	40.1882	50.2086	60.0989	70.079	80.0316	90.1378	100.045
1394	32.86	10.1011	20.0945	30.2428	40.1185	50.1464	60.0901	70.0724	79.9873	90.1674	100.036
1395	32.88	10.0201	19.9586	30.2308	40.2644	50.1882	60.1902	70.1142	80.0544	90.0879	100.103
1396	32.9	10.0923	19.973	30.2127	40.1943	50.1185	60.1163	70.2586	79.9243	90.1185	100.157
1397	32.92	10.0611	19.9342	30.1632	40.2268	50.2086	60.2066	70.0857	79.9342	90.1611	100.159
1398	32.94	9.99671	20.0316	30.1142	40.2025	50.2005	60.079	70.1033	80.125	90.0768	100.121
1399	32.96	9.96097	19.9293	30.1378	40.1314	50.2248	60.1737	70.1716	79.9849	90.0407	100.072
1400	32.98	9.93418	19.9706	30.1506	40.2188	50.2086	60.1527	70.1055	80.1527	90.0611	100.142
1401	33	10.0339	19.9967	30.0835	40.2046	50.0879	60.1011	70.0014	80.0453	90.0566	100.134
1402	33.02	9.95613	19.9801	30.1506	40.2107	50.0945	60.1336	70.1527	80.0247	90.14	100.142
1403	33.04	10.0061	19.9366	30.2448	40.1882	50.2066	60.1163	70.1314	79.9801	90.1357	100.131
1404	33.06	9.87396	19.9391	30.1611	40.1569	50.2107	60.0901	70.1527	80.079	90.112	100.131
1405	33.08	9.99906	19.9873	30.184	40.1882	50.2086	60.1527	70.1314	80.043	90.0362	100.088
1406	33.1	10.0879	20.0131	30.0879	40.1632	50.14	60.0476	70.0923	80.0038	90.0701	99.9801
1407	33.12	9.99906	19.9706	30.1569	40.2025	50.1737	60.0108	70.1421	79.9778	90.1378	100.123
1408	33.14	9.86109	19.9778	30.0835	40.1943	50.1695	60.0611	70.0014	80.1442	90.1185	100.136
1409	33.16	9.90689	20.0084	30.125	40.182	50.2046	60.0945	70.1098	80.0813	90.1569	100.057
1410	33.18	9.91189	20.0656	30.1421	40.1314	50.1984	60.159	70.1611	80.043	90.0224	100.142
1411	33.2	9.85591	20.0857	30.184	40.0989	50.2546	60.0247	70.14	80.0293	90.1055	100.086
1412	33.22	10.0014	20.14	30.1569	40.184	50.2086	60.0061	70.0201	80.043	90.1207	100.125
1413	33.24	9.90438	20.0014	30.2467	40.1506	50.2086	60.1314	70.0108	80.0835	90.0634	100.043
1414	33.26	10.0476	20.0339	30.2896	40.159	50.0656	60.0989	70.1923	80.0407	90.1506	100.088
1415	33.28	9.89936	19.8918	30.2605	40.1506	50.0923	60.0014	70.1758	80.0061	90.1207	100.072
1416	33.3	9.88671	20.0038	30.3332	40.2973	50.182	60.0407	70.0108	80.1185	90.0835	100.086
1417	33.32	9.94642	20.0611	30.1882	40.1943	50.0589	59.9218	70.1271	80.0879	90.0768	100.088
1418	33.34	10.0084	19.9561	30.2188	40.2428	50.1293	60.0154	70.125	80.1799	90.1653	100.165
1419	33.36	9.97059	20.0038	30.1569	40.0989	50.1077	60.125	70.0679	80.3608	90.0901	100.129
1420	33.38	9.98963	20.027	30.1293	40.0857	50.0879	60.0589	70.079	80.1861	90.0901	100.142
1421	33.4	10.0201	20.0038	30.2147	40.1011	50.0967	60.112	70.0476	80.1778	90.1207	100.176
1422	33.42	9.90438	20.0154	30.1799	40.1527	50.1882	59.9268	70.1207	80.0967	90.1098	100.136
1423	33.44	9.91189	19.9967	30.2288	40.1778	50.1011	60.0656	70.0544	80.1421	90.2348	100.068
1424	33.46	9.88417	20.027	30.1737	40.2086	50.1314	59.9415	70.159	80.1314	90.1271	100.022
1425	33.48	10.0407	19.9317	30.1378	40.1077	50.2268	60.0177	70.1421	80.0362	90.0857	100.001
1426	33.5	9.98726	19.8968	30.125	40.0857	50.1207	60.0701	70.1902	79.944	90.0453	100.099
1427	33.52	9.88671	19.8943	30.1442	40.1378	50.0589	59.9967	70.1055	79.9754	90.0362	100.063
1428	33.54	10.0014	19.9849	30.125	40.0813	50.1378	60.0385	70.1758	80.027	90.0901	100.081
1429	33.56	9.96097	19.9778	30.159	40.2025	50.0679	60.0453	70.1163	80.0544	90.1033	100.105
1430	33.58	9.92432	19.9634	30.1011	40.1207	50.182	60.0201	70.1506	80.0989	90.1336	100.001
1431	33.6	9.95128	19.7922	30.1378	40.0923	50.0813	59.9682	70.0679	80.0108	90.0901	100.079
1432	33.62	9.87139	20.0084	30.1207	40.1077	50.1923	60.0108	70.0634	80.0177	90.0879	100.048
1433	33.64	9.89178	19.961	30.0293	40.0835	50.1163	60.0813	70.1207	79.9778	90.1055	100.063
1434	33.66	9.79766	19.973	30.1163	40.1293	50.1737	59.9873	70.0131	79.944	90.1695	100.038
1435	33.68	9.93909	19.9019	30.1611	40.1293	50.2167	60.0945	70.112	80.0453	90.1228	99.9561
1436	33.7	9.97298	19.8893	30.2005	40.1185	50.1632	60.043	70.1055	80.0407	90.0476	100.041
1437	33.72	9.99906	20.0316	30.1716	40.2066	50.2388	59.9801	70.1464	80.0131	89.9944	100.048
1438	33.74	9.92184	19.9561	30.1228	40.1378	50.159	59.9778	70.0879	79.9586	90.0201	99.9044
1439	33.76	9.90187	20.0385	30.1464	40.0923	50.1442	60.0293	70.0857	80.0154	90.0813	100.054
1440	33.78	9.94154	19.9991	30.0293	40.2188	50.1611	59.9991	70.0813	80.0611	90.0989	100.025
1441	33.8	9.92679	19.9825	30.0385	40.1357	50.0177	59.9944	70.0656	80.0407	90.1464	100.015
1442	33.82	10.0521	19.8968	30.0923	40.1336	50.1357	60.0177	70.1421	80.0362	90.0701	100.063
1443	33.84	10.0634	20.0476	30.1923	40.184	50.0813	59.9896	70.1611	79.9634	90.0945	100.052
1444	33.86	10.0061	19.973	30.0061	40.0724	50.0014	60.1378	70.1861	79.9849	89.9825	100.025
1445	33.88	9.90689	19.8765	30.1271	40.1055	50.1077	59.9873	70.1611	80.0656	90.0247	100.125
1446	33.9	9.89936	19.9169	30.0611	40.0768	50.027	59.9825	70.0154	80.0385	90.0656	100.059
1447	33.92	10.0521	19.9218	30.1228	40.1548	50.0679	59.9658	70.0131	79.9967	90.0131	100.108
1448	33.94	9.98489	19.961	30.1336	40.0724	50.0701	60.0316	70.1207	79.9464	90.0177	100.103
1449	33.96	9.82972	19.9119	30.1033	40.1527	50.0724	60.0589	70.0945	80.0224	90.079	100.045
1450	33.98	9.83236	19.8084	30.1055	40.0634	50.1077	60.0566	70.027	80.0634	90.0385	99.9682
1451	34	9.97537	19.8031	30.1336	40.1293	50.1011	60.0385	69.9991	79.9391	90.1185	100.001
1452	34.02	9.86109	19.8429	30.0967	40.1506	49.9415	60.079	70.0701	79.9754	89.8943	100.006
1453	34.04	9.89431	19.9825	30.0989	40.0724	50.0813	59.9537	70.0293	79.8791	90.1314	100.001
1454	34.06	9.93909	19.8765	30.0901	40.0989	50.1357	59.9415	70.0589	79.9293	90.0566	99.9896
1455	34.08	10.0131	19.8688	30.1632	40.1033	50.1077	59.944	70.027	80.0521	89.9849	100.07
1456	34.1	9.95128	19.9019	30.0201	40.1207	50.0611	59.8943	70.0131	79.9342	89.9873	100.105
1457	34.12	9.93172	19.8637	30.0701	40.0589	50.0521	59.9218	70.0316	79.9366	90.0177	100.108
1458	34.14	9.75656	19.9293	29.9537	40.1163	49.9967	59.8559	69.9706	79.9873	90.0385	99.9967
1459	34.16	9.97059	19.9317	30.1271	40.0768	50.0656	59.9268	70.0566	79.9194	89.9873	100.02
1460	34.18	9.94154	19.9634	30.1098	40.0679	50.0544	60.0201	70.0385	79.9944	90.0407	100.054
1461	34.2	9.92432	19.9169	29.9825	40.0679	50.043	59.8765	69.9967	80.027	90.112	100.068
1462	34.22	9.87396	19.8324	30.1011	40.0201	50.0724	59.8662	70.0611	79.9896	90.0177	100.029
1463	34.24	9.80843	19.8994	29.9967	40.1077	50.0634	59.8611	70.0224	80.0224	90.0247	100.011
1464	34.26	9.8585	19.9169	30.1228	40.1228	50.0656	59.961	70.0589	79.8611	90.0385	100.036
1465	34.28	9.87139	19.9366	30.0835	40.0879	50.112	60.0566	70.0407	79.9849	90.0679	99.9706
1466	34.3	9.94154	19.9019	30.0362	40.159	50.0061	59.9489	70.0084	80.0476	90.027	99.9069
1467	34.32	9.8585	19.9194	30.0131	40.0476	50.0945	59.9825	69.9778	79.9144	90.0407	99.9537
1468	34.34	9.96338	19.8867	29.9873	40.1011	50.0407	59.9561	69.9218	80.1011	90.0544	100.018
1469	34.36	9.89431	19.9489	29.9944	40.1271	50.0611	60.0154	70.0316	79.961	89.9896	100.077
1470	34.38	9.96819	19.7676	29.944	40.125	50.1674	60.043	69.9778	79.8968	89.9489	100.011
1471	34.4	9.97537	19.8507	30.1293	40.079	50.2005	60.0316	70.1142	79.992	90.1271	100.103
1472	34.42	9.90187	19.9415	30.0901	40.0061	50.1142	60.0362	70.0339	79.9586	89.992	99.9967
1473	34.44	9.86367	19.8765	30.0247	40.1737	50.0131	60.0131	69.9967	79.9119	89.9119	100.045
1474	34.46	9.85591	19.8585	30.0901	40.1902	50.0362	60.0316	70.0177	79.9169	89.9489	100.022
1475	34.48	9.83763	19.9754	30.1142	40.1207	50.0566	59.9513	69.835	79.8867	89.9243	100.027
1476	34.5	9.73697	19.8791	30.0768	40.2208	50.1033	60.0201	69.9561	79.9967	90.027	100.088
1477	34.52	9.82443	19.8559	30.0453	40.0701	50.1163	60.0634	70.0061	79.9391	90.0362	99.9464
1478	34.54	9.98726	19.9243	30.0385	40.1142	49.9849	59.8191	69.9243	79.9218	89.9293	99.9094
1479	34.56	9.86882	19.8403	30.0154	40.1055	50.0656	59.9801	70.1293	80.0154	89.8111	99.9268
1480	34.58	9.78136	19.9144	29.9825	40.1611	50.0177	59.9561	70.0247	79.9268	90.0385	100.015
1481	34.6	9.86882	19.8791	30.0224	40.2268	50.1207	59.9896	69.9317	79.9268	89.9119	100.038
1482	34.62	9.85331	19.7566	30.0901	40.1799	50.0656	59.9489	69.9342	79.9119	90.0108	100.05
1483	34.64	9.82708	19.8585	30.1077	40.2005	50.0038	59.9825	70.0131	79.8585	90.043	99.9464
1484	34.66	9.88925	19.8637	30.0901	40.2188	50.0835	59.9658	70.0923	79.8507	90.0362	100.036
1485	34.68	9.86882	19.9561	30.0634	40.2288	50.1271	60.0498	69.9682	79.9119	89.9537	99.973
1486	34.7	9.86109	19.9194	30.0901	40.159	50.0407	60.0385	70.0989	79.8791	89.9682	100.061
1487	34.72	9.87139	19.8429	30.1737	40.3313	50.0014	60.0154	70.0014	79.9169	90.0084	100.032
1488	34.74	9.87396	19.835	29.9967	40.2877	50.0544	59.9293	70.0768	79.8994	90.0038	99.8994
1489	34.76	9.93418	19.8111	30.1485	40.1653	50.0521	59.9634	70.0476	79.9415	89.9537	99.9658
1490	34.78	9.91189	19.9391	30.0901	40.3461	50.1632	60.0247	69.9658	79.9391	89.9849	100.015
1491	34.8	9.85331	19.9489	30.1506	40.3219	50.1293	60.0923	70.0476	79.9464	89.9537	99.944
1492	34.82	9.88162	19.8714	30.0293	40.3517	50.0701	60.0316	70.0521	79.9682	89.9513	100.054
1493	34.84	9.86882	19.8637	30.0544	40.2781	49.9586	60.0544	70.0293	79.9094	89.9967	99.9801
1494	34.86	9.80574	19.8507	30.0656	40.1421	50.0453	60.0293	70.0768	80.0131	90.1421	100.029
1495	34.88	9.79766	19.8816	30.1548	40.159	50.0835	59.9464	70.0498	80.0362	89.9069	100.032
1496	34.9	9.92432	19.8918	30.1421	40.1861	50.0498	59.9873	70.0293	79.9634	89.973	100.045
1497	34.92	9.87652	19.9144	30.1207	40.2722	50.079	60.0945	70.0967	79.8816	90.0813	99.8893
1498	34.94	9.8481	19.8165	30.2188	40.3106	50.0923	60.0131	70.1314	79.9317	90.0656	100.032
1499	34.96	9.93664	19.8943	30.2268	40.2781	50.0038	60.0611	70.1011	80.0316	90.0945	100.027
1500	34.98	9.98726	19.9873	30.2107	40.3826	50.0293	59.9754	70.0316	79.8918	90.1271	100.027
1501	35	10.0177	19.9561	30.0611	40.1943	50.0857	60.0224	70.0634	80.0476	90.1098	100.006
1502	35.02	9.97298	20.0177	30.1716	40.2858	50.1357	59.9561	70.0923	80.0407	90.0407	100.015
1503	35.04	9.90689	19.9754	30.1077	40.3182	50.1207	60.0634	70.0634	79.9873	90.0857	100.034
1504	35.06	10.0247	19.9293	30.1378	40.37	50.1716	60.0989	70.2388	79.9825	90.1163	99.9243
1505	35.08	9.88162	19.8324	30.184	40.3754	50.1548	60.0656	70.2005	80.0177	90.0316	99.9682
1506	35.1	9.88671	19.8867	30.2127	40.42	50.184	60.0544	70.1548	80.0014	90.159	100.11
1507	35.12	9.87396	19.9293	30.1778	40.42	50.1548	60.1464	70.1055	80.0385	90.125	100.036
1508	35.14	10.027	19.9243	30.1737	40.4164	50.1142	60.1378	70.1185	80.0084	90.0901	100.052
1509	35.16	9.96097	19.9415	30.1378	40.3106	50.1716	60.0316	70.0521	79.9634	90.0923	100.048
1510	35.18	9.90939	19.9169	30.2248	40.3332	50.1506	60.1163	70.1207	79.9967	90.0701	100.018
1511	35.2	9.97298	19.9754	30.2408	40.4235	50.1293	60.0131	70.1527	79.9944	90.0879	100.018
1512	35.22	9.87907	20.0385	30.2507	40.3535	50.1357	59.9991	70.0224	80.1548	90.1357	100.072
1513	35.24	9.99671	19.9873	30.1882	40.2722	50.2722	60.1357	70.1464	80.1055	89.9967	99.9144
1514	35.26	9.92432	20.0544	30.182	40.3424	50.2527	60.125	70.1293	80.1695	90.0385	100.07
1515	35.28	10.0293	19.9243	30.2388	40.3049	50.2388	60.0945	70.2208	79.9513	89.9896	100.032
1516	35.3	10.0108	20.0476	30.182	40.2086	50.1207	60.0857	70.1357	80.0989	89.9801	100.006
1517	35.32	10.0611	20.0316	30.2368	40.2248	50.2935	60.1695	70.027	80.1378	90.0131	100.14
1518	35.34	10.0724	19.8867	30.2566	40.1163	50.2268	60.0201	69.9944	80.0701	90.0813	100.157
1519	35.36	10.0038	19.9044	30.1336	40.2248	50.1674	60.1421	70.1695	80.1142	90.0679	100.025
1520	35.38	9.98489	20.0679	30.1737	40.1485	50.1378	60.0768	70.0679	80.1485	90.0879	100.001
1521	35.4	9.95855	19.8867	30.1923	40.1163	50.2208	60.0498	70.0566	80.1185	90.1548	100.125
1522	35.42	9.94154	19.9144	30.2005	40.0453	50.2487	60.0724	70.1569	80.1357	89.9778	99.9464
1523	35.44	9.87907	19.9194	30.1336	39.9991	50.2005	60.0634	70.1314	80.1163	90.0879	99.992
1524	35.46	9.95128	19.9069	30.0293	40.1011	50.0879	59.9561	70.0857	80.1695	89.9849	100.048
1525	35.48	9.97776	19.9268	30.1902	40.1527	50.1632	59.9991	70.0131	80.0989	90.0201	99.9218
1526	35.5	9.95128	20.0857	30.0967	40.1485	50.1098	59.9801	70.0611	80.1055	89.9658	100.083
1527	35.52	10.027	19.9537	30.1716	40.1943	50.2408	59.9873	70.1033	80.0014	90.0407	99.973
1528	35.54	10.0339	19.8031	30.1271	40.1033	50.2388	59.9991	70.0247	80.0084	89.9489	100.004
1529	35.56	9.98252	19.9317	30.0701	40.1033	50.079	59.9391	69.9537	80.027	90.0177	99.9801
1530	35.58	9.98014	19.9754	30.0544	40.1207	50.2388	59.9169	70.1163	79.992	89.9754	99.961
1531	35.6	9.98252	19.8893	30.14	40.0589	50.1055	60.0453	70.0589	80.0634	89.9537	99.8968
1532	35.62	9.87907	19.8943	30.0724	40.0857	50.0901	60.0108	70.0589	79.9537	89.8943	99.9967
1533	35.64	9.87139	19.8533	30.0768	40.0038	50.1077	60.0989	69.9513	80.0656	90.043	100.05
1534	35.66	9.80574	19.9218	30.0634	40.0453	50.0967	59.9415	69.9778	80.0177	89.9825	100.05
1535	35.68	9.86367	19.8688	30.0768	40.2046	50.0084	59.9391	69.9706	79.973	90.0634	100.029
1536	35.7	9.86625	19.8324	30.0701	40.1357	49.9801	59.9243	70.079	80.0247	90.0247	100.083
1537	35.72	9.76487	19.8191	30.2025	40.112	50.1548	59.9754	70.0521	80.0061	90.0835	99.973
1538	35.74	9.88162	19.8816	30.0923	40.1548	50.1357	59.9366	70.0656	79.9366	90.1271	99.9801
1539	35.76	9.97059	19.9119	30.0656	40.1464	50.1228	59.9293	70.1142	79.9464	90.0901	100.02
1540	35.78	9.99671	19.9069	30.0701	40.0989	50.1421	60.0589	70.0108	79.8918	90.0768	100.159
1541	35.8	9.80574	19.8637	30.159	40.125	50.1611	60.0544	70.0362	79.8842	90.1421	100.105
1542	35.82	9.92432	19.9144	30.2388	40.1506	50.0835	59.9658	70.0476	79.8765	90.0611	100.013
1543	35.84	9.89431	19.9069	30.1943	40.1185	50.0589	59.9268	70.0989	79.9489	90.1357	99.9873
1544	35.86	9.99435	19.9489	30.2086	40.2605	50.1902	59.9268	70.0724	79.9268	90.0521	100.121
1545	35.88	10.0131	19.9342	30.1569	40.2208	50.2308	60.0014	70.0224	79.9489	90.1964	100.032
1546	35.9	10.0224	20.0476	30.2722	40.3681	50.2546	60.0385	69.9561	80.0362	90.3627	100.059
1547	35.92	9.95371	19.9464	30.2248	40.3011	50.1674	60.0521	70.1098	79.9561	90.2467	100.11
1548	35.94	9.98489	20.0679	30.2916	40.3608	50.1674	60.1464	70.2046	80.0362	90.2248	100.038
1549	35.96	9.84287	20.0084	30.3517	40.4868	50.1902	60.1293	70.2368	79.973	90.2954	100.247
1550	35.98	9.92679	20.0108	30.3498	40.6588	50.2722	60.1799	70.2858	80.0038	90.2722	100.249
1551	36	10.0724	20.0544	30.2954	40.6853	50.3163	60.1098	70.2916	79.9658	90.4546	100.316
1552	36.02	10.0362	19.9489	30.5232	40.8151	50.3987	60.2408	70.3106	80.1527	90.427	100.386
1553	36.04	9.92432	20.0967	30.5714	40.8714	50.3572	60.3718	70.3517	80.0923	90.5571	100.427
1554	36.06	10.0521	20.0768	30.7228	40.9513	50.5491	60.4409	70.4391	80.1674	90.7384	100.522
1555	36.08	9.96097	20.2388	30.8675	41.2228	50.5872	60.5856	70.4598	80.32	90.8867	100.654
1556	36.1	10.0768	20.2858	30.9682	41.5531	50.6573	60.5475	70.6012	80.3424	90.9622	100.681
1557	36.12	10.0611	20.2605	31.1261	41.936	50.8098	60.7013	70.697	80.3681	91.1632	100.824
1558	36.14	10.2467	20.397	31.2693	42.4881	50.8559	60.8191	70.9006	80.4615	91.3134	101.062
1559	36.16	10.3182	20.5134	31.6363	42.9187	51.0373	60.9718	71.0623	80.6272	91.6999	101.243
1560	36.18	10.4129	20.6424	32.0096	43.191	51.1485	61.1432	71.3257	80.7412	92.1293	101.654
1561	36.2	10.4147	20.8778	32.4981	43.203	51.3718	61.4383	71.6424	80.8778	92.5977	102.147
1562	36.22	10.4919	21.0453	32.9421	42.9902	51.7363	61.8178	72.0373	81.0623	92.9967	102.711
1563	36.24	10.5762	21.3238	33.3066	42.7922	52.1685	62.2046	72.4973	81.3853	93.263	103.127
1564	36.26	10.7454	21.6484	33.4491	42.7017	52.5483	62.6081	72.7659	81.837	93.4476	103.432
1565	36.28	10.9452	22.0264	33.4538	42.6629	52.8591	62.9828	72.9961	82.3021	93.303	103.553
1566	36.3	11.1033	22.3804	33.3468	42.4085	53.1365	63.1575	73.0849	82.7049	93.158	103.396
1567	36.32	11.3996	22.7246	33.1277	42.0407	53.2889	63.1038	73.0353	82.9135	92.964	103.183
1568	36.34	11.8791	22.906	32.9724	41.6758	53.2556	62.9507	72.8429	82.853	92.8501	102.958
1569	36.36	12.3731	23.1304	32.8416	41.3844	53.1336	62.7631	72.7009	82.7447	92.6566	102.86
1570	36.38	12.8653	23.202	32.6104	41.0857	53.0203	62.6287	72.5002	82.5204	92.365	102.678
1571	36.4	13.2303	23.1429	32.2497	40.8337	52.833	62.4801	72.3822	82.416	92.0235	102.378
1572	36.42	13.399	23.0885	31.8098	40.6603	52.7121	62.2887	72.0662	82.2727	91.5809	101.835
1573	36.44	13.3078	22.8701	31.4452	40.6181	52.5179	61.9286	71.7285	82.0617	91.1902	101.431
1574	36.46	13.1309	22.6348	31.1674	40.4868	52.1846	61.5035	71.4278	81.6904	90.9194	101.078
1575	36.48	12.9265	22.4313	30.9694	40.4426	51.8714	61.0498	70.9754	81.3294	90.8416	100.857
1576	36.5	12.851	22.1695	30.7271	40.3144	51.5651	60.893	70.7868	80.9873	90.6484	100.726
1577	36.52	12.7035	21.8643	30.6707	40.3535	51.2935	60.7313	70.6692	80.7185	90.4935	100.513
1578	36.54	12.3844	21.4322	30.5443	40.348	51.0476	60.5555	70.5825	80.5118	90.388	100.475
1579	36.56	11.9938	21.1239	30.5101	40.2208	50.8918	60.4443	70.5459	80.52	90.28	100.346
1580	36.58	11.573	20.8337	30.3182	40.2507	50.7663	60.3461	70.4041	80.3645	90.3238	100.272
1581	36.6	11.2635	20.6318	30.1861	40.1421	50.6647	60.348	70.32	80.2916	90.2228	100.142
1582	36.62	10.8943	20.5134	30.1943	40.1799	50.5346	60.2742	70.1861	80.1674	90.1964	100.114
1583	36.64	10.7128	20.3898	30.182	40.125	50.4426	60.0989	70.1695	80.0316	90.1357	100.2
1584	36.66	10.6089	20.2644	30.159	40.0316	50.3068	60.0589	70.2005	80.0453	90.0857	100.059
1585	36.68	10.4801	20.1758	30.1902	40.043	50.3068	60.1207	70.1207	80.0084	90.0989	100.11
1586	36.7	10.3106	20.2086	30.1142	40.112	50.2566	60.1464	70.1336	79.9754	90.1055	100.112
1587	36.72	10.3144	20.1011	30.0724	40.1163	50.303	60.0566	70.1378	80.0201	90.0224	99.9754
1588	36.74	10.1569	20.0967	30.1778	40.125	50.1778	60.043	70.1653	79.9243	90.1271	99.9991
1589	36.76	10.0923	20.0154	30.1882	40.1011	50.2683	60.0131	70.0634	79.9537	90.0923	99.9317
1590	36.78	10.0061	20.0177	30.2761	40.1527	50.1632	60.0339	69.9706	79.8244	89.973	100.092
1591	36.8	10.0108	20.0177	30.3257	40.1357	50.2046	59.9513	69.9944	79.9169	90.0967	100.119
1592	36.82	10.0634	19.9967	30.1653	40.112	50.3049	60.0084	70.1055	79.9754	90.0967	100.11
1593	36.84	9.98014	20.1033	30.1357	40.0989	50.2973	60.14	70.1098	80.0293	90.0316	100.134
1594	36.86	10.0014	20.0453	30.2625	40.1011	50.1674	60.043	70.0813	80.0967	90.0108	100.05
1595	36.88	10.0177	20.043	30.2896	40.0453	50.0724	60.0154	70.079	80.0611	89.9967	99.9873
1596	36.9	9.99906	20.0498	30.2167	40.0945	50.14	59.9658	70.1163	80.0679	89.9218	100.059
1597	36.92	9.95855	19.9967	30.1098	40.0316	50.1293	59.9218	69.9391	80.027	90.0084	99.9293
1598	36.94	10.0835	19.9896	30.0224	40.0611	50.159	59.9682	69.9754	80.0316	90.0656	100.038
1599	36.96	10.0084	19.9561	29.961	39.8533	50.1077	59.9967	70.0316	79.9342	89.9489	99.9194
1600	36.98	9.93664	19.9342	30.0407	40.0154	50.1077	59.9537	70.1098	79.9754	90.0566	99.9967
1601	37	10.0154	19.9944	30.0108	40.0611	50.1716	59.9243	69.9944	79.8968	89.8994	100.011
1602	37.02	9.89936	19.9293	30.0656	40.0544	50.0857	59.9144	70.0247	79.8662	90.0679	99.8994
1603	37.04	9.92679	20.0224	29.9944	40.0407	49.9537	59.8994	69.9169	79.9317	90.0362	99.9194
1604	37.06	9.86109	19.7814	30.0544	40.1098	50.0544	59.8842	70.0857	80.0224	89.9658	99.9194
1605	37.08	9.86625	19.8714	29.9754	40.0339	49.961	59.944	70.0835	79.8765	90.0293	99.9991
1606	37.1	9.86109	19.8403	29.9317	39.9513	49.8867	59.9537	70.0611	79.8455	89.8533	99.9634
1607	37.12	9.86882	19.7676	29.9825	40.0154	50.0177	59.8507	69.9342	79.9366	89.8918	100.02
1608	37.14	9.77588	19.8324	29.9366	39.9415	49.9825	59.8765	69.8968	79.7868	89.8918	99.9366
1609	37.16	9.80305	19.8637	29.9268	40.0201	50.0247	59.7731	70.0108	79.8084	89.9489	99.8765
1610	37.18	9.76211	19.7085	30.0061	40.0108	50.0407	59.8403	69.9896	79.5825	89.9194	99.9094
1611	37.2	9.83763	19.8218	30.0385	39.9682	49.9801	59.8455	69.9561	79.8271	89.8662	99.8714
1612	37.22	9.90689	19.8244	29.9094	39.8559	49.8714	59.9415	70.043	79.8791	89.8791	99.9243
1613	37.24	9.69407	19.8585	29.9561	40.0224	49.9778	59.9849	69.9268	79.8111	89.8271	99.9119
1614	37.26	9.87652	19.7621	30.0108	40.0835	49.9044	59.8943	69.8893	79.8111	89.7593	99.8714
1615	37.28	9.78409	19.8165	30.0385	39.9489	49.9658	59.8611	70.0061	79.8057	89.8533	99.8994
1616	37.3	9.74539	19.8507	29.9873	39.9537	49.8791	59.8507	69.9849	79.9194	89.9144	99.9464
1617	37.32	9.89431	19.737	30.0589	40.0014	49.9944	60.0014	69.9415	79.7482	89.8507	99.8943
1618	37.34	9.80843	19.7285	29.9682	39.9561	49.9218	59.8688	69.8816	79.9366	89.8637	99.8585
1619	37.36	9.835	19.8455	29.9194	40.0131	49.8507	59.7482	70.0177	79.9293	89.9019	99.874
1620	37.38	9.77314	19.6912	30.0177	39.8968	49.8893	59.8714	69.9019	79.8688	89.9489	99.8585
1621	37.4	9.81111	19.7114	30.0879	39.9119	49.8376	59.9044	69.9754	79.8688	89.9658	99.8611
1622	37.42	9.84025	19.7841	30.1077	39.9268	49.9019	59.9658	70.0014	79.9317	89.8791	99.9218
1623	37.44	9.73132	19.7868	30.0701	39.8765	49.9342	59.8297	69.8376	79.8138	89.9044	99.8057
1624	37.46	9.80036	19.8455	30.0521	39.9682	50.0453	59.7538	69.7566	79.8791	89.8842	99.8791
1625	37.48	9.74539	19.7704	29.9991	39.9464	50.0679	59.8765	69.7704	79.8791	90.0177	99.9019
1626	37.5	9.74539	19.6795	30.0701	40.0177	49.973	59.795	69.9243	79.8585	89.8943	99.8994
1627	37.52	9.70563	19.8111	30.0656	39.9658	50.0521	59.9119	69.9317	79.9561	89.8842	99.9044
1628	37.54	9.77314	19.7977	30.1163	39.9415	49.9342	59.8004	69.9342	79.8918	89.9094	99.9119
1629	37.56	9.73414	19.8455	29.9682	40.0989	49.992	59.8968	70.0061	79.9044	89.8968	99.8481
1630	37.58	9.82177	19.7538	30.0768	39.9489	49.9825	59.8842	69.8688	79.8765	89.9194	99.8297
1631	37.6	9.91439	19.737	30.0835	40.0131	50.027	59.8816	69.7868	79.8637	89.9094	99.9144
1632	37.62	9.71425	19.6618	29.9194	40.1033	50.0247	59.8842	69.7676	79.9561	89.9243	99.7566
1633	37.64	9.73132	19.6765	30.0108	39.9513	50.0108	59.8765	69.8842	79.8481	89.8637	99.8481
1634	37.66	9.82972	19.6378	30.0293	39.9944	50.0293	59.7704	69.8271	79.9069	89.7895	99.9706
1635	37.68	9.70275	19.6999	30.0634	39.9489	49.9391	59.7786	69.8165	79.8507	89.9317	99.7841
1636	37.7	9.79225	19.6318	30.0131	39.9896	49.8994	59.8218	69.9094	79.9169	89.8481	99.8559
1637	37.72	9.76487	19.7257	29.9342	39.8765	49.9342	59.9366	69.8765	79.8714	89.8765	99.9169
1638	37.74	9.72281	19.7704	29.9561	40.0131	50.0038	59.8031	69.8994	79.9243	89.8084	99.7621
1639	37.76	9.78953	19.7649	29.9119	39.9991	49.9243	59.7621	69.9194	79.8455	89.8533	99.8893
1640	37.78	9.78409	19.7621	29.8893	40.0813	49.8994	59.8004	69.9586	79.8218	89.8816	99.8244
1641	37.8	9.69986	19.6647	29.9391	40.0316	50.0014	59.8403	69.9391	79.7621	89.9489	99.7649
1642	37.82	9.77314	19.795	29.8403	40.0945	49.9342	59.8842	69.9634	79.8031	89.7814	99.9243
1643	37.84	9.82443	19.7731	29.9489	40.1548	49.9218	59.7868	69.9415	79.8918	89.8244	99.8507
1644	37.86	9.80305	19.8191	29.9317	39.9194	49.9537	59.8031	69.944	79.9489	89.9415	99.8244
1645	37.88	9.83236	19.7676	29.8765	40.0407	49.8816	59.8765	69.9391	79.8165	89.9094	99.9194
1646	37.9	9.81645	19.6588	29.8994	40.0293	49.9464	59.9706	69.8842	79.8191	89.8084	99.697
1647	37.92	9.76487	19.8031	29.9586	39.9896	49.9513	59.9849	69.8968	79.8111	89.9144	99.9218
1648	37.94	9.71425	19.7454	29.9366	39.9513	49.9849	59.8138	69.8191	79.7649	89.8637	99.8662
1649	37.96	9.66178	19.8943	29.8893	40.1378	49.9754	59.8585	69.8559	79.8507	89.8791	99.8324
1650	37.98	9.69116	19.835	29.8559	40.0108	49.9513	59.8324	69.9044	79.8688	89.8218	99.7676
1651	38	9.76487	19.7895	29.944	40.0247	49.8867	59.7731	69.9658	79.8084	89.9144	99.7649
1652	38.02	9.82972	19.7566	29.8637	40.043	49.8611	59.9293	69.8611	79.8111	89.8918	99.8816
1653	38.04	9.8481	19.6135	29.9634	39.9586	50.0038	59.9044	69.8244	79.8662	89.9144	99.9144
1654	38.06	9.80305	19.7285	29.9293	39.9537	49.9019	59.9094	69.8507	79.8271	89.8324	99.9561
1655	38.08	9.75377	19.7814	29.8297	39.8791	49.7593	59.7649	69.8455	79.8455	89.8611	99.8791
1656	38.1	9.73414	19.6795	29.8714	39.8918	49.8918	59.8403	69.8893	79.7977	89.8429	99.8559
1657	38.12	9.71711	19.8057	29.7426	39.9069	49.9218	59.9754	69.9513	79.7285	89.8765	99.8481
1658	38.14	9.76211	19.737	29.8637	39.9658	49.9415	59.8816	69.8455	79.8376	89.874	99.7868
1659	38.16	9.80305	19.6883	29.8842	40.0154	49.9754	59.8111	69.9144	79.7731	89.8165	99.7085
1660	38.18	9.6736	19.7922	29.8111	39.992	50.0061	59.8611	69.8867	79.8031	89.7977	99.8765
1661	38.2	9.70563	19.8191	29.9169	39.8943	49.9044	59.7341	69.8893	79.7621	89.8165	99.944
1662	38.22	9.76763	19.6618	29.8637	40.0108	49.8968	59.7868	69.9658	79.8429	89.8376	99.8297
1663	38.24	9.80574	19.8031	29.8481	40.079	49.8376	59.8244	69.9144	79.8084	89.874	99.874
1664	38.26	9.76211	19.7649	29.9094	39.9658	49.874	59.8084	69.9218	79.8403	89.9044	99.8994
1665	38.28	9.81378	19.7257	29.9944	39.9873	49.9044	59.8765	69.8271	79.7593	89.9044	99.7977
1666	38.3	9.73414	19.7704	29.8585	40.0201	49.8111	59.9044	69.8191	79.7085	89.8191	99.8297
1667	38.32	9.78681	19.7566	29.9754	39.9658	49.8218	59.8918	69.8559	79.9119	90.0177	99.9489
1668	38.34	9.81378	19.7759	29.9293	39.9464	49.9293	59.8297	69.9293	79.737	89.8968	99.8994
1669	38.36	9.77862	19.7538	29.944	40.0701	49.944	59.8376	69.8637	79.8138	89.8867	99.8842
1670	38.38	9.77314	19.7027	30.0453	40.0061	49.961	59.8968	69.9778	79.8765	89.9069	99.8714
1671	38.4	9.76487	19.8507	29.8611	39.9801	49.8057	59.8559	69.9658	79.795	89.9019	99.9561
1672	38.42	9.78681	19.7895	29.9144	39.8611	49.8297	59.9218	69.9658	79.9069	90.0224	99.8918
1673	38.44	9.78136	19.7731	29.8688	39.9464	50.0061	59.8994	70.0724	79.8918	89.9268	99.9218
1674	38.46	9.76211	19.8084	29.9044	39.9194	49.944	59.8662	69.9489	79.7341	89.7841	99.8688
1675	38.48	9.6677	19.7704	29.9561	40.0316	49.8507	59.9293	69.874	79.8057	89.9069	99.8662
1676	38.5	9.62266	19.8376	29.8918	39.9873	49.973	59.8943	69.8893	79.7922	89.9391	99.8662
1677	38.52	9.81911	19.7171	29.9801	39.8662	49.9194	59.9489	69.8559	79.8218	89.8968	99.7814
1678	38.54	9.77314	19.697	29.9537	39.9366	50.0131	59.8084	69.8688	79.7228	89.9218	99.9682
1679	38.56	9.84549	19.8893	29.9268	39.8507	49.8816	59.8324	69.9991	79.8455	89.8867	99.8867
1680	38.58	9.77039	19.7171	29.9513	39.8403	49.8816	59.8662	69.8994	79.8765	89.9586	99.8111
1681	38.6	9.82708	19.7398	29.9561	39.8533	49.8968	59.8165	69.8111	79.8084	89.9682	99.8611
1682	38.62	9.82708	19.7257	29.9094	39.8637	49.9044	59.8031	69.9243	79.795	89.8637	99.795
1683	38.64	9.82443	19.8084	29.8918	39.9873	49.8662	59.7454	69.992	79.7482	89.8918	99.7977
1684	38.66	9.78136	19.7566	29.992	39.9634	49.9218	59.8271	69.8191	79.8585	89.9342	99.8662
1685	38.68	9.84025	19.7621	29.961	39.9144	49.9778	59.8297	69.9634	79.8585	89.9144	99.9268
1686	38.7	9.79766	19.8057	30.0339	39.9849	50.0611	59.8968	70.0108	79.8611	89.9169	99.8403
1687	38.72	9.77314	19.7977	30.0201	39.9778	49.9194	59.7814	69.8559	79.7621	90.0544	99.8138
1688	38.74	9.83763	19.795	29.9801	39.9119	50.0084	59.8791	69.8611	79.72	89.9464	99.8918
1689	38.76	9.77039	19.7922	30.0061	39.9391	49.9169	59.7922	69.8297	79.8004	89.9194	99.8611
1690	38.78	9.73132	19.835	29.9094	39.992	49.9944	59.8943	69.9991	79.7593	89.8244	99.9144
1691	38.8	9.74539	19.874	29.8244	39.9342	49.9243	59.8994	70.0945	79.8297	89.8507	99.9366
1692	38.82	9.85071	19.8585	29.8637	40.0247	49.9293	59.8218	69.8533	79.8533	89.9194	99.7895
1693	38.84	9.86882	19.8191	29.9342	39.8688	49.9682	59.8791	70.0061	79.8611	90.0131	99.8218
1694	38.86	9.70851	19.7257	30.0362	39.9243	50.0724	59.8533	69.8943	79.8893	89.9243	99.8004
1695	38.88	9.87396	19.6912	30.0014	39.9991	49.8585	59.944	69.8968	79.8507	89.9094	99.8714
1696	38.9	9.8481	19.8165	29.8968	39.9218	50.0154	59.9144	69.8842	79.7895	89.8765	99.8816
1697	38.92	9.77588	19.874	29.973	39.8867	49.8533	59.874	69.8943	79.7731	89.8943	99.9317
1698	38.94	9.81111	19.7814	30.0014	39.9169	49.8714	59.8165	69.8994	79.8842	89.9944	99.9682
1699	38.96	9.92926	19.7868	29.9144	39.9243	49.9896	59.8994	69.9044	79.72	89.9268	99.8994
1700	38.98	9.76211	19.7841	29.9991	39.9218	49.9069	59.7398	69.8662	79.835	89.9754	99.9561
1701	39	9.84549	19.7977	29.9706	39.9094	49.9634	59.9293	69.9144	79.8297	89.9489	99.9391
1702	39.02	9.98014	19.737	30.0316	40.0857	49.9218	59.8994	69.9169	79.8893	89.8791	99.9094
1703	39.04	9.98014	19.7085	29.9849	40.0014	50.0835	59.944	69.9243	79.835	89.9706	99.9317
1704	39.06	9.88925	19.8031	29.9342	39.9537	49.9489	59.8842	69.8765	79.7841	89.9464	99.9391
1705	39.08	9.81111	19.7676	30.0201	39.9682	49.9169	59.7114	69.9069	79.7895	89.9658	99.8867
1706	39.1	9.78953	19.7114	29.9896	39.961	49.8662	59.8165	69.8244	79.8455	89.9415	100.02
1707	39.12	9.835	19.8376	30.043	40.0201	49.9849	59.9342	70.0247	79.8533	89.9896	99.9967
1708	39.14	9.82177	19.7482	30.0038	40.1142	50.0339	59.9019	69.8507	79.8429	90.0154	99.9342
1709	39.16	9.80843	19.8816	29.9391	39.9778	49.8918	59.9169	69.9754	79.8637	90.0014	99.9069
1710	39.18	9.89431	19.8138	29.9464	40.0566	49.9634	59.9586	69.9561	79.8533	89.9268	100.036
1711	39.2	9.77314	19.7786	29.9873	39.9464	49.9896	59.8867	69.9243	79.8111	89.9317	100.011
1712	39.22	9.93172	19.8084	30.1142	40.027	50.0038	59.9513	69.9754	79.7922	90.0316	99.9873
1713	39.24	9.88671	19.9513	29.992	40.1011	49.9586	59.8714	70.0857	79.7922	89.9896	99.8662
1714	39.26	9.93418	19.8004	30.1632	40.1011	50.0407	59.9218	69.9561	79.8533	90.027	99.9896
1715	39.28	9.90187	19.9169	30.0038	40.184	50.0385	60.0589	69.9825	79.973	89.973	99.9366
1716	39.3	9.77039	19.9415	30.1421	40.3106	50.043	60.0247	70.0014	79.835	90.0923	100.006
1717	39.32	9.83763	19.9658	30.1674	40.2147	50.0945	59.9682	69.9561	79.8031	90.2086	100.097
1718	39.34	9.92432	19.9561	30.2046	40.3572	50.1611	59.8816	70.0945	79.8893	90.1163	100.041
1719	39.36	9.82972	19.9169	30.3144	40.4784	50.0989	60.1033	69.9094	79.9069	90.2328	100.138
1720	39.38	9.89684	19.9489	30.2546	40.515	50.1527	60.1271	70.0566	79.8688	90.359	100.182
1721	39.4	9.8481	19.8816	30.2839	40.6454	50.2527	60.2781	70.1357	80.0084	90.3461	100.18
1722	39.42	9.93418	20.0293	30.4147	40.8893	50.1923	60.2586	70.1033	79.9706	90.4751	100.341
1723	39.44	9.97537	20.0108	30.4835	40.9293	50.2428	60.3718	70.2935	80.0813	90.5555	100.453
1724	39.46	10.0247	20.0813	30.5587	41.1464	50.427	60.3608	70.3276	80.1336	90.6393	100.52
1725	39.48	9.99906	20.14	30.744	41.2576	50.4478	60.515	70.4835	80.2066	90.6955	100.629
1726	39.5	10.0701	20.1632	30.9428	41.4691	50.5475	60.5903	70.5872	80.1799	90.8701	100.808
1727	39.52	10.1882	20.2368	31.0049	41.6603	50.7855	60.7579	70.7042	80.4217	91.0038	100.885
1728	39.54	10.1464	20.3554	31.2147	42.0442	50.8258	60.8204	70.8389	80.6058	91.184	101.021
1729	39.56	10.1293	20.4985	31.3718	42.5663	51.0143	60.8968	70.9391	80.6543	91.4305	101.153
1730	39.58	10.2664	20.6751	31.5887	43.1182	51.0668	61.0679	71.1485	80.8004	91.6926	101.267
1731	39.6	10.4076	20.6984	31.8893	43.5669	51.2595	61.2722	71.3916	80.8803	91.9932	101.583
1732	39.62	10.4164	20.9081	32.3106	43.8701	51.4417	61.4826	71.6566	81.0281	92.4948	102.024
1733	39.64	10.6573	21.0589	32.7555	43.8191	51.6817	61.7882	72.0578	81.2015	92.9828	102.546
1734	39.66	10.7085	21.2713	33.1421	43.5734	52.0367	62.2737	72.4746	81.3961	93.3473	103.037
1735	39.68	10.8994	21.5973	33.5	43.3287	52.3713	62.6499	72.8591	81.8324	93.61	103.468
1736	39.7	11.0061	22.0425	33.7246	43.279	52.7552	63.0393	73.2147	82.294	93.7228	103.805
1737	39.72	11.2076	22.4151	33.7661	43.3002	53.1564	63.3987	73.4664	82.7766	93.6993	103.928
1738	39.74	11.5134	22.7882	33.6811	43.1582	53.3963	63.5155	73.5517	83.2492	93.512	103.871
1739	39.76	11.8297	23.1136	33.5103	42.8141	53.5328	63.4858	73.5082	83.4112	93.3572	103.589
1740	39.78	12.2576	23.3629	33.3501	42.3489	53.5789	63.3586	73.3567	83.4061	93.2213	103.369
1741	39.8	12.7841	23.5716	33.2271	41.9567	53.4927	63.1698	73.1866	83.2193	93.0986	103.28
1742	39.82	13.2887	23.6346	33.0673	41.6165	53.3636	63.0566	73.0566	83.0422	92.9144	103.205
1743	39.84	13.6407	23.6265	32.8893	41.3691	53.2576	62.9296	72.924	82.928	92.5722	102.986
1744	39.86	13.7246	23.5187	32.4687	41.1055	53.1172	62.7569	72.7257	82.8221	92.1559	102.61
1745	39.88	13.6499	23.3049	32.0701	40.9622	53.0125	62.4914	72.4252	82.6904	91.7192	102.124
1746	39.9	13.4497	23.1543	31.7349	40.7786	52.8118	62.1261	72.0566	82.3885	91.4005	101.707
1747	39.92	13.2725	22.9519	31.4156	40.6073	52.4456	61.715	71.6378	82.0172	91.1747	101.343
1748	39.94	13.2107	22.7366	31.1913	40.5427	52.1669	61.3397	71.3406	81.6066	90.8854	101.078
1749	39.96	13.1514	22.4691	30.9908	40.4112	51.8816	61.0868	71.069	81.1871	90.7242	100.885
1750	39.98	12.9446	22.17	30.7649	40.2896	51.6066	60.8905	70.8572	80.8943	90.6721	100.788
1751	40	12.5338	21.7503	30.6287	40.2973	51.348	60.7496	70.6484	80.6469	90.5249	100.595
1752	40.02	12.1569	21.3424	30.5507	40.2605	51.0701	60.6484	70.5903	80.5793	90.4478	100.513
1753	40.04	11.7649	21.0362	30.4666	40.3517	50.9268	60.4426	70.4478	80.3572	90.2916	100.364
1754	40.06	11.3808	20.7649	30.3627	40.1207	50.7895	60.37	70.2664	80.2703	90.2428	100.295
1755	40.08	11.1304	20.7013	30.2208	40.1902	50.6287	60.2644	70.3406	80.2954	90.1228	100.249
1756	40.1	10.9537	20.4182	30.184	40.1098	50.584	60.1758	70.1984	80.0879	90.1569	100.217
1757	40.12	10.8098	20.359	30.2527	40.1142	50.5134	60.1421	70.1716	80.0989	90.0544	100.129
1758	40.14	10.6165	20.28	30.2107	40.0989	50.3952	60.0407	70.0084	80.0247	90.1357	99.992
1759	40.16	10.4409	20.1984	30.125	40.027	50.2328	60.0945	70.0453	79.9391	90.0679	99.9586
1760	40.18	10.2742	20.1674	30.0544	40.0813	50.2268	59.992	70.0201	79.9991	90.1055	100.008
1761	40.2	10.303	20.0177	30.1778	40.1357	50.1716	59.9366	69.9849	79.9342	89.9682	99.9366
1762	40.22	10.2586	20.0611	30.1293	40.0224	50.159	59.9991	69.9513	79.9825	89.9366	99.9537
1763	40.24	10.1569	19.8918	30.0879	40.0224	50.1569	59.9873	70.0589	79.9119	89.992	99.9317
1764	40.26	10.0656	20.0945	30.0108	40.027	49.9944	59.9489	70.0813	79.9489	89.9342	100.001
1765	40.28	10.1485	19.9464	29.992	39.9634	50.0967	59.9415	69.9801	79.8111	89.9342	99.9044
1766	40.3	10.0701	19.8031	29.973	39.9825	50.0813	59.8893	70.0293	79.8403	89.8165	99.9293
1767	40.32	9.98963	19.737	29.8816	39.9044	50.0476	59.9825	69.9896	79.7593	89.8004	100.018
1768	40.34	9.98726	19.9293	29.973	39.8791	49.9342	59.9464	69.8842	79.8611	89.8893	99.7786
1769	40.36	9.95371	19.8765	29.944	39.973	50.1464	59.8376	69.9586	79.8994	89.874	99.961
1770	40.38	9.97298	19.7621	30.079	39.9218	49.9293	59.8637	69.9513	79.795	89.8191	99.8611
1771	40.4	9.94398	19.8455	30.0084	39.8994	50.0293	59.9391	69.8376	79.8714	89.8481	99.795
1772	40.42	9.95613	19.7977	29.9706	39.8688	49.9706	59.8842	69.9415	79.8376	89.973	99.7621
1773	40.44	9.93664	19.8918	29.8816	39.961	49.8714	59.9144	69.835	79.8084	89.8057	99.8031
1774	40.46	9.74539	19.8191	30.0108	39.9094	49.9778	59.795	69.9144	79.8559	89.8376	99.8271
1775	40.48	9.84025	19.7922	29.9194	39.8943	49.8994	59.8893	69.9044	79.7538	89.8943	99.7426
1776	40.5	9.91687	19.6853	29.973	39.9658	49.9169	59.9044	69.9044	79.8455	89.7922	99.8765
1777	40.52	9.86625	19.7398	29.9094	39.7786	49.9537	59.8004	69.7841	79.7426	89.9019	99.8111
1778	40.54	9.82708	19.6318	29.9778	39.8994	49.9801	59.9094	69.9069	79.8057	89.9489	99.8429
1779	40.56	9.85591	19.7649	29.8429	39.8662	50.0177	59.8507	69.9293	79.8943	89.8791	99.8943
1780	40.58	9.97059	19.835	29.9119	39.8271	50.0857	59.944	69.961	79.835	89.8165	99.8376
1781	40.6	9.92184	19.8324	29.8611	39.8968	50.0293	59.8455	69.8455	79.9268	89.7482	99.7814
1782	40.62	9.77039	19.7841	29.8165	39.8507	50.0108	59.8031	69.7341	79.7566	89.8111	99.8507
1783	40.64	9.76487	19.7027	29.961	39.8791	49.9634	59.8662	69.8559	79.8138	89.7426	99.8688
1784	40.66	9.82972	19.8662	29.8111	39.8111	49.9658	59.8455	69.8191	79.7593	89.8559	99.8403
1785	40.68	9.81111	19.6912	29.8376	39.8165	49.9801	59.8662	69.8867	79.697	89.9094	99.8662
1786	40.7	9.87652	19.6558	29.9218	39.8297	49.9144	59.8111	69.9218	79.7341	89.9391	99.8271
1787	40.72	9.69116	19.6853	29.9342	39.7114	49.8218	59.8057	69.8791	79.8057	89.8637	99.8455
1788	40.74	9.82177	19.7142	29.9119	39.7538	49.9268	59.8297	69.8004	79.7482	89.8031	99.7704
1789	40.76	9.91189	19.6348	29.8585	39.7593	49.7895	59.6378	69.7977	79.8004	89.7922	99.8611
1790	40.78	9.76487	19.6378	29.9019	39.874	49.8455	59.8816	69.8968	79.6439	89.795	99.7482
1791	40.8	9.78409	19.6941	29.8376	39.6883	49.8481	59.7895	69.8271	79.8057	89.7814	99.6707
1792	40.82	9.77862	19.5981	29.9019	39.7566	49.8765	59.7454	69.7841	79.6073	89.7977	99.7426
1793	40.84	9.73414	19.7114	29.7841	39.7814	49.9194	59.6647	69.8084	79.7114	89.7868	99.6883
1794	40.86	9.78136	19.6677	29.7621	39.7977	49.7786	59.7257	69.8165	79.7027	89.8324	99.795
1795	40.88	9.76487	19.7482	29.8714	39.7426	49.7676	59.8507	69.7676	79.7142	89.7704	99.6999
1796	40.9	9.69407	19.6677	29.8765	39.8057	49.7649	59.6469	69.7257	79.6196	89.874	99.7171
1797	40.92	9.73132	19.6941	29.7922	39.7895	49.7482	59.7114	69.9243	79.7922	89.8244	99.8111
1798	40.94	9.65881	19.7868	29.7977	39.8994	49.8943	59.6736	69.8893	79.6348	89.874	99.7621
1799	40.96	9.70275	19.6795	29.9706	39.944	49.795	59.8031	69.7731	79.7649	89.7841	99.6318
1800	40.98	9.71711	19.6528	29.9268	39.7482	49.7538	59.8324	69.6378	79.737	89.795	99.7814
1801	41	9.61655	19.737	29.8842	39.8084	49.8842	59.7759	69.9194	79.6853	89.5825	99.6824
1802	41.02	9.71138	19.5539	29.8218	39.8084	49.7649	59.8297	69.6853	79.7731	89.9169	99.6073
1803	41.04	9.73414	19.6558	29.8611	39.8004	49.8611	59.7426	69.6707	79.7731	89.8611	99.7285
1804	41.06	9.65583	19.6012	29.8455	39.8165	49.992	59.7977	69.8138	79.8138	89.7704	99.7426
1805	41.08	9.71711	19.6528	29.8714	39.8994	49.8138	59.7649	69.7114	79.835	89.7482	99.6647
1806	41.1	9.76211	19.6135	29.9513	39.8507	49.874	59.6912	69.7285	79.7676	89.7649	99.7285
1807	41.12	9.77039	19.6135	29.973	39.8429	49.8765	59.8559	69.8271	79.8191	89.8031	99.7085
1808	41.14	9.74259	19.6257	29.9537	39.7868	49.8968	59.8111	69.7482	79.7868	89.7649	99.7341
1809	41.16	9.73414	19.4952	30.0857	39.7977	49.9415	59.7841	69.8271	79.72	89.9366	99.7621
1810	41.18	9.62571	19.6824	30.0989	39.795	50.0362	59.8533	69.7704	79.7786	89.7841	99.7704
1811	41.2	9.55714	19.6647	30.1271	39.8218	50.0679	59.874	69.7454	79.8165	89.8765	99.6765
1812	41.22	9.75933	19.6408	30.1758	39.8867	50.2428	59.835	69.8507	79.9825	89.7649	99.7482
1813	41.24	9.81645	19.6348	29.9268	39.8191	50.1882	59.992	69.8004	79.9218	89.9825	99.7313
1814	41.26	9.79496	19.7228	30.0611	39.7228	50.1882	59.7786	69.8138	79.8138	89.8138	99.6073
1815	41.28	9.78953	19.6469	30.1964	39.7142	50.0967	59.8111	69.8297	79.9119	89.9094	99.7398
1816	41.3	9.65881	19.5918	30.0131	39.7341	50.1055	59.795	69.7285	79.9706	89.8031	99.7895
1817	41.32	9.64386	19.7085	29.9464	39.8637	50.1336	59.8376	69.7398	80.0014	89.8791	99.6707
1818	41.34	9.75656	19.6765	30.0014	39.8893	50.112	59.7593	69.6647	79.8791	89.8244	99.7142
1819	41.36	9.73414	19.6824	29.8918	39.8403	50.1098	59.7704	69.7731	79.9873	89.7142	99.7257
1820	41.38	9.76211	19.7142	29.9194	39.8297	50.1098	59.8191	69.7482	80.0476	89.8218	99.7649
1821	41.4	9.78409	19.6853	29.9094	39.7426	49.9489	59.8031	69.7482	80.0201	89.8218	99.7228
1822	41.42	9.63178	19.5018	29.9144	39.7621	49.9801	59.8218	69.795	80.0453	89.8533	99.5699
1823	41.44	9.78409	19.5887	29.8559	39.8455	49.9682	59.7649	69.7398	79.9464	89.7895	99.72
1824	41.46	9.68825	19.6135	29.8165	39.8611	49.9873	59.7538	69.7566	79.961	89.7759	99.6257
1825	41.48	9.6736	19.6677	29.7895	39.8533	49.7977	59.7454	69.7593	79.944	89.7895	99.6736
1826	41.5	9.72565	19.5475	29.8791	39.8867	49.7977	59.6499	69.8218	79.9754	89.8165	99.8111
1827	41.52	9.71996	19.6135	29.8481	39.9119	49.9293	59.7228	69.7841	79.7977	89.7171	99.7313
1828	41.54	9.70275	19.697	29.8481	39.7649	49.8084	59.5918	69.7895	79.8111	89.8816	99.6941
1829	41.56	9.52487	19.6165	29.7895	39.8138	49.8084	59.7114	69.7593	79.72	89.737	99.6165
1830	41.58	9.63783	19.7257	29.7977	39.7814	49.8324	59.7085	70.0154	79.8297	89.6824	99.6999
1831	41.6	9.53463	19.6588	29.7398	39.6499	49.6824	59.6999	69.6883	79.8271	89.8297	99.7114
1832	41.62	9.72565	19.6318	29.7868	39.7621	49.7814	59.8324	69.7257	79.7649	89.7171	99.8111
1833	41.64	9.56986	19.5887	29.8057	39.8297	49.9144	59.6795	69.6707	79.7085	89.7142	99.8057
1834	41.66	9.65583	19.6618	29.7841	39.7786	49.8271	59.6647	69.7085	79.7538	89.8714	99.8111
1835	41.68	9.71711	19.6135	29.8455	39.795	49.7257	59.6073	69.7171	79.8084	89.8324	99.6707
1836	41.7	9.63783	19.5314	29.835	39.737	49.8165	59.6528	69.7426	79.6528	89.7841	99.6227
1837	41.72	9.78136	19.6853	29.7895	39.72	49.8791	59.7285	69.7731	79.7482	89.7171	99.6999
1838	41.74	9.79225	19.5981	29.7841	39.8918	49.7922	59.6408	69.7649	79.7341	89.7114	99.6618
1839	41.76	9.52813	19.6618	29.7426	39.8481	49.8324	59.7228	69.6853	79.7895	89.7621	99.6618
1840	41.78	9.66474	19.5887	29.7085	39.7814	49.8816	59.7085	69.8271	79.6853	89.7841	99.6348
1841	41.8	9.65881	19.6528	29.8533	39.8138	49.8111	59.8031	69.8429	79.7313	89.8481	99.7454
1842	41.82	9.68241	19.5918	29.7895	39.8271	49.7922	59.7398	69.7814	79.6499	89.6499	99.7228
1843	41.84	9.57302	19.6941	29.7454	39.7922	49.8191	59.6196	69.72	79.6378	89.7454	99.6795
1844	41.86	9.63783	19.7538	29.8165	39.7895	49.8004	59.6707	69.7922	79.72	89.8138	99.8031
1845	41.88	9.61041	19.6318	29.8688	39.8084	49.7566	59.7895	69.8057	79.7285	89.7538	99.7454
1846	41.9	9.60424	19.5635	29.8455	39.7482	49.8084	59.7841	69.6795	79.7171	89.7841	99.7341
1847	41.92	9.56986	19.6736	29.8559	39.8714	49.8218	59.6795	69.7142	79.7786	89.8867	99.7454
1848	41.94	9.6677	19.5249	29.8842	39.8816	49.8111	59.6795	69.737	79.7704	89.835	99.7027
1849	41.96	9.59805	19.6227	29.8138	39.8297	49.7676	59.6012	69.8297	79.6941	89.8138	99.795
1850	41.98	9.62571	19.6439	29.9586	39.874	49.7482	59.6558	69.8191	79.7649	89.7814	99.8004
1851	42	9.49519	19.6104	29.8662	39.8324	49.8271	59.795	69.7142	79.6765	89.7814	99.7454
1852	42.02	9.61348	19.6647	29.9317	39.8297	49.961	59.7171	69.7977	79.8004	89.8688	99.835
1853	42.04	9.62571	19.6824	29.7398	39.8994	49.8867	59.7171	69.8376	79.5949	89.8842	99.8084
1854	42.06	9.57932	19.6677	29.8403	39.8688	49.8637	59.7398	69.8004	79.8111	89.7313	99.9094
1855	42.08	9.72565	19.72	29.8403	39.8057	49.7257	59.7868	69.8057	79.6824	89.7731	99.7759
1856	42.1	9.77862	19.7257	29.7114	39.8271	49.7895	59.7895	69.8842	79.8611	89.7868	99.795
1857	42.12	9.77588	19.7171	29.8507	40.0038	49.7731	59.6618	69.7786	79.7114	89.7621	99.7841
1858	42.14	9.80036	19.8111	29.8004	39.8637	49.7593	59.737	69.7649	79.737	89.8111	99.8004
1859	42.16	9.75656	19.5825	29.8559	39.7593	49.7676	59.7593	69.8816	79.6707	89.7142	99.8376
1860	42.18	9.65583	19.6073	29.8165	39.8271	49.7814	59.6883	69.7704	79.737	89.8138	99.8218
1861	42.2	9.72281	19.72	29.8481	39.7841	49.8376	59.7786	69.6287	79.7977	89.6257	99.7731
1862	42.22	9.68825	19.5635	29.8455	39.7649	49.8165	59.7341	69.7895	79.6469	89.7566	99.6765
1863	42.24	9.54754	19.6318	29.8559	39.7285	49.8244	59.7759	69.6765	79.6999	89.7482	99.7621
1864	42.26	9.8585	19.7566	29.8429	39.9754	49.8084	59.8031	69.8218	79.7649	89.8218	99.7426
1865	42.28	9.71996	19.6012	29.8165	39.7482	49.835	59.7922	69.8559	79.6618	89.7676	99.7731
1866	42.3	9.73132	19.7285	29.8637	39.8455	49.8559	59.72	69.6941	79.8481	89.8218	99.7841
1867	42.32	9.71425	19.7228	29.795	39.9489	49.8662	59.7814	69.8376	79.7538	89.8057	99.7649
1868	42.34	9.66474	19.6824	29.7977	39.8218	49.8842	59.7759	69.8031	79.7731	89.8138	99.6883
1869	42.36	9.78409	19.6439	29.8244	39.8559	49.8533	59.7895	69.8111	79.6765	89.8714	99.8455
1870	42.38	9.76211	19.6765	29.8244	39.8507	49.7398	59.6853	69.8271	79.5118	89.6824	99.8918
1871	42.4	9.68825	19.7922	29.8507	39.8559	49.7649	59.7593	69.7482	79.6707	89.8084	99.8271
1872	42.42	9.67654	19.7482	29.8765	39.9537	49.8165	59.72	69.8637	79.7056	89.835	99.7482
1873	42.44	9.69986	19.7977	29.7786	39.7649	49.8429	59.7114	69.7922	79.72	89.8324	99.8455
1874	42.46	9.73132	19.8031	29.9366	39.8893	49.8968	59.6912	69.7868	79.7257	89.8057	99.8031
1875	42.48	9.78953	19.7056	29.8165	39.9094	49.7731	59.7171	69.737	79.7257	89.6795	99.7313
1876	42.5	9.72281	19.7285	29.8218	39.9094	49.9243	59.7621	69.7142	79.7814	89.8031	99.7566
1877	42.52	9.64085	19.6941	29.8403	40.0014	49.8324	59.7566	69.6165	79.6378	89.7398	99.8004
1878	42.54	9.63481	19.7868	29.9586	39.9317	49.7868	59.6677	69.8004	79.8031	89.8057	99.7621
1879	42.56	9.55714	19.6439	29.9044	39.8867	49.7731	59.7027	69.8688	79.8611	89.8429	99.7257
1880	42.58	9.79766	19.6647	29.8662	39.9658	49.8165	59.7814	69.8688	79.7676	89.7426	99.8533
1881	42.6	9.78953	19.6883	29.9293	39.874	49.7814	59.8481	69.8191	79.6318	89.7786	99.835
1882	42.62	9.74819	19.8165	29.9268	39.8585	49.8943	59.8111	69.8893	79.7841	89.7114	99.9268
1883	42.64	9.56986	19.7538	29.944	39.8297	49.8714	59.7171	69.7228	79.7566	89.8218	99.8867
1884	42.66	9.75377	19.5085	29.9119	39.9317	49.8662	59.8611	69.9144	79.7868	89.72	99.7704
1885	42.68	9.72565	19.6408	29.9801	40.0201	49.7814	59.8867	69.8559	79.6765	89.8031	99.8324
1886	42.7	9.64686	19.6647	30.0014	39.8429	49.8297	59.8791	69.8057	79.7731	89.9144	99.8867
1887	42.72	9.79496	19.7398	29.973	39.874	49.9825	59.795	69.8111	79.8004	89.7171	99.8244
1888	42.74	9.66474	19.8297	29.8585	39.9464	49.9293	59.9586	69.8918	79.7649	89.8324	99.8688
1889	42.76	9.70275	19.7285	29.9825	39.9069	49.9561	59.9044	70.0014	79.8218	89.8057	99.8611
1890	42.78	9.75933	19.8084	29.973	39.9119	49.9144	59.8218	69.9119	79.7649	89.8324	99.8297
1891	42.8	9.67948	19.8324	30.0108	39.8791	49.8867	59.8533	69.9391	79.7621	89.8244	99.7538
1892	42.82	9.85331	19.8429	30.0154	39.9634	49.944	59.8403	69.8403	79.7868	89.8138	99.7841
1893	42.84	9.84549	19.8165	29.7171	39.8842	49.9658	59.8867	69.8559	79.7426	89.7704	99.7142
1894	42.86	9.87139	19.8165	29.8559	39.944	49.8867	59.8791	69.795	79.8585	89.8004	99.8244
1895	42.88	9.78136	19.8867	29.7759	39.9268	50.0247	59.8376	69.8324	79.874	89.7454	99.7649
1896	42.9	9.85591	19.8968	29.8765	39.9268	49.8791	59.9144	69.8893	79.8662	89.8084	99.7621
1897	42.92	9.72565	19.7895	29.9144	39.9537	49.9944	59.9366	69.8867	79.8111	89.8244	99.7786
1898	42.94	9.84287	19.7482	29.9268	39.9194	49.8765	59.795	69.8455	79.6257	89.9169	99.7538
1899	42.96	9.83763	19.7759	29.9415	39.944	49.8138	59.8943	69.9169	79.7841	89.8165	99.7868
1900	42.98	9.76211	19.7704	30.043	40.1314	49.8218	59.9586	69.8842	79.8084	89.9778	99.8611
1901	43	9.90187	19.6795	29.8943	40.0177	49.8968	59.8376	69.7895	79.6677	89.9044	99.874
1902	43.02	9.82972	19.7649	29.9366	40.079	49.9896	59.8943	69.9069	79.8376	89.9561	99.8765
1903	43.04	9.79766	19.7649	29.9268	40.0589	49.9801	59.9944	69.8191	79.8585	89.8429	99.9825
1904	43.06	9.75933	19.7142	30.0247	39.9991	49.9825	59.9944	69.874	79.8637	89.9658	99.8376
1905	43.08	9.81378	19.6883	29.9194	40.0989	49.8791	59.9778	69.9293	79.8403	89.9194	99.8994
1906	43.1	9.86625	19.8165	29.8893	40.1207	49.9293	59.8714	69.9415	79.8611	89.9513	99.8867
1907	43.12	9.75656	19.7868	30.0339	40.3808	49.9537	59.9778	69.8842	79.8111	90.1055	99.8968
1908	43.14	9.85071	19.8244	30.079	40.4023	49.9094	60.0566	69.9415	79.7257	90.0679	99.9268
1909	43.16	9.88671	19.7621	30.184	40.4357	50.0362	60.0879	69.9366	79.9561	90.1185	100.015
1910	43.18	9.85591	19.9317	30.3144	40.5934	50.0857	60.1984	70.1569	79.9366	90.2858	100.161
1911	43.2	9.85331	19.9044	30.4581	40.7214	50.1055	60.2935	70.1695	80.0201	90.2408	100.223
1912	43.22	9.84287	19.9754	30.5216	40.8124	50.1653	60.3535	70.1527	79.8688	90.4443	100.437
1913	43.24	9.94885	19.9991	30.6303	40.9181	50.3387	60.2167	70.335	79.9825	90.5249	100.46
1914	43.26	9.97537	20.0498	30.7454	41.1207	50.4581	60.4734	70.359	80.0453	90.7228	100.581
1915	43.28	9.8481	20.2167	30.9342	41.44	50.5619	60.6363	70.5507	80.1674	90.7496	100.69
1916	43.3	9.94642	20.1882	31.0476	41.8861	50.6499	60.6543	70.6692	80.4287	90.9415	100.835
1917	43.32	10.1485	20.4059	31.141	42.4919	50.6824	60.8124	70.7963	80.4784	91.1643	100.923
1918	43.34	10.1185	20.4666	31.4322	42.9944	50.8637	60.9549	70.992	80.4801	91.3898	101.042
1919	43.36	10.3163	20.5167	31.7207	43.4267	50.9586	61.1055	71.0813	80.6809	91.9495	101.513
1920	43.38	10.4835	20.7566	32.1784	43.573	51.2258	61.2507	71.5547	80.8559	92.4125	101.864
1921	43.4	10.5746	20.9019	32.7009	43.454	51.5002	61.667	71.8918	81.0189	92.8794	102.417
1922	43.42	10.5699	21.0498	33.1234	43.2056	51.8579	62.1304	72.3704	81.3489	93.2657	102.929
1923	43.44	10.7482	21.4391	33.5269	43.0493	52.2556	62.5742	72.8141	81.78	93.5375	103.373
1924	43.46	10.8829	21.9063	33.7132	43.0005	52.697	62.9864	73.1188	82.292	93.594	103.738
1925	43.48	11.0846	22.3369	33.7694	42.9908	53.0555	63.2703	73.3366	82.8041	93.4725	103.835
1926	43.5	11.3461	22.8064	33.647	42.8711	53.286	63.3999	73.4417	83.1068	93.2632	103.641
1927	43.52	11.7207	23.1136	33.4525	42.6223	53.3887	63.3327	73.2913	83.2175	93.0724	103.303
1928	43.54	12.2698	23.3461	33.2195	42.2776	53.3981	63.1745	73.1123	83.0898	92.9999	103.034
1929	43.56	12.8445	23.5118	33.149	41.933	53.2497	62.9637	72.9252	82.8724	92.928	103.028
1930	43.58	13.3101	23.5979	33.0788	41.5068	53.0815	62.8134	72.8261	82.7128	92.8108	103.054
1931	43.6	13.6215	23.46	32.9237	41.1892	53.0365	62.7264	72.7604	82.6096	92.4789	102.978
1932	43.62	13.6414	23.3144	32.6588	40.8791	52.9882	62.6607	72.6127	82.5825	92.1282	102.602
1933	43.64	13.4257	23.1456	32.263	40.7398	52.8965	62.4235	72.328	82.4499	91.7363	102.18
1934	43.66	13.1548	23.0084	31.7586	40.4339	52.6435	62.1	71.9944	82.1851	91.3059	101.651
1935	43.68	13.0473	22.9	31.4112	40.4094	52.3627	61.6758	71.5232	81.8435	90.9549	101.22
1936	43.7	13.0333	22.6491	31.0934	40.3068	52.0177	61.3021	71.2178	81.4391	90.8098	100.893
1937	43.72	13.016	22.4422	30.9513	40.2288	51.6948	60.8675	70.8637	81.069	90.6089	100.666
1938	43.74	12.8301	22.1136	30.6227	40.2428	51.4751	60.7882	70.7071	80.72	90.4683	100.554
1939	43.76	12.4989	21.6551	30.6027	40.1964	51.2338	60.5539	70.5539	80.5523	90.4164	100.477
1940	43.78	12.0668	21.281	30.5265	40.0813	51.0061	60.3681	70.3517	80.379	90.2954	100.251
1941	43.8	11.6104	20.9044	30.3257	40.0453	50.7827	60.3125	70.359	80.2644	90.1378	100.255
1942	43.82	11.3498	20.7157	30.3332	39.9754	50.6042	60.2268	70.3106	80.1098	90.1674	100.161
1943	43.84	11.0293	20.5265	30.1506	39.8943	50.5587	60.1336	70.1442	80.1984	89.9967	100.159
1944	43.86	10.7963	20.3294	30.1378	40.0154	50.4546	60.1527	70.1464	80.0679	89.9706	100.02
1945	43.88	10.5539	20.2664	30.184	39.9849	50.3424	60.0476	70.0498	80.0177	89.9754	100.018
1946	43.9	10.4339	20.2046	30.0945	40.0038	50.2722	59.9849	69.9069	79.9537	89.9243	100.043
1947	43.92	10.3987	20.1033	30.0989	39.8403	50.1964	59.9801	69.8943	79.9069	89.8893	99.9169
1948	43.94	10.2248	20.0224	30.1163	39.9069	50.1055	59.9634	69.9391	79.8637	89.961	99.8481
1949	43.96	10.1142	20.0201	29.9896	39.9094	50.0879	59.9317	69.992	80.0061	89.8244	99.8271
1950	43.98	10.1033	19.8968	29.9169	39.8765	50.112	59.8662	69.8791	79.9094	89.9218	99.8403
1951	44	10.0476	19.8714	30.0108	39.8842	50.0476	59.8403	69.7341	79.9044	89.8765	99.8918
1952	44.02	9.97298	19.8533	30.0656	39.8403	49.9706	59.8403	69.7649	79.9094	89.8481	99.8816
1953	44.04	9.91439	19.8111	29.9991	39.8031	49.9489	59.7895	69.8403	79.8455	89.9069	99.7398
1954	44.06	9.89684	19.7868	29.8031	39.8403	50.0521	59.8481	69.8244	79.8057	89.7731	99.8455
1955	44.08	9.82972	19.7285	29.8662	39.8218	49.8867	59.8376	69.8031	79.7593	89.8084	99.8244
1956	44.1	9.78136	19.8765	29.8893	39.7426	49.8994	59.6795	69.874	79.7759	89.8559	99.7171
1957	44.12	9.89431	19.6912	29.8455	39.8403	49.8994	59.6408	69.7704	79.8297	89.6736	99.8816
1958	44.14	9.69407	19.6528	29.8191	39.8637	49.8585	59.7027	69.6647	79.737	89.6883	99.8376
1959	44.16	9.69407	19.6227	29.7814	39.8004	49.9415	59.7341	69.7257	79.8084	89.7398	99.7676
1960	44.18	9.83236	19.6707	29.7649	39.8611	49.8481	59.7868	69.8376	79.7285	89.8481	99.6765
1961	44.2	9.84287	19.6883	29.7841	39.7759	49.8244	59.7649	69.8057	79.6912	89.795	99.6618
1962	44.22	9.80036	19.7454	29.8271	39.6348	49.7841	59.737	69.7841	79.7228	89.8376	99.7538
1963	44.24	9.80305	19.6999	29.8191	39.7426	49.7398	59.8084	69.7341	79.7398	89.7257	99.6736
1964	44.26	9.69697	19.6439	29.835	39.737	49.6853	59.7257	69.6469	79.6941	89.8585	99.7649
1965	44.28	9.66178	19.7426	29.8138	39.7538	49.7814	59.6378	69.7426	79.6677	89.6883	99.7593
1966	44.3	9.69407	19.5667	29.72	39.6912	49.7621	59.7814	69.6765	79.5635	89.7257	99.6165
1967	44.32	9.69407	19.5571	29.795	39.8084	49.8455	59.6439	69.7398	79.6348	89.7285	99.6824
1968	44.34	9.48851	19.573	29.6499	39.6227	49.8481	59.8165	69.7814	79.6736	89.5825	99.6853
1969	44.36	9.64986	19.5379	29.7977	39.8084	49.7786	59.7171	69.6941	79.6196	89.7085	99.6042
1970	44.38	9.76211	19.6012	29.6528	39.8271	49.8218	59.6618	69.7398	79.7114	89.6765	99.6736
1971	44.4	9.82177	19.7566	29.7649	39.573	49.7566	59.7398	69.8637	79.5603	89.7649	99.8004
1972	44.42	9.67948	19.8057	29.7621	39.7868	49.8111	59.6765	69.6257	79.7426	89.7482	99.6469
1973	44.44	9.62266	19.72	29.7814	39.7228	49.7027	59.573	69.7056	79.7171	89.7056	99.7027
1974	44.46	9.64386	19.6104	29.8057	39.6588	49.7285	59.6999	69.6912	79.5887	89.5762	99.7566
1975	44.48	9.72565	19.5539	29.7228	39.7114	49.7759	59.7085	69.7257	79.6795	89.6647	99.6765
1976	44.5	9.71711	19.6378	29.7313	39.7056	49.8455	59.7759	69.6647	79.6883	89.7398	99.5507
1977	44.52	9.64686	19.4985	29.7027	39.7621	49.7171	59.72	69.6499	79.7027	89.7538	99.5475
1978	44.54	9.53463	19.5667	29.7228	39.7171	49.6469	59.6196	69.6618	79.6104	89.6227	99.6558
1979	44.56	9.56669	19.5346	29.7114	39.8218	49.6618	59.7398	69.6912	79.6165	89.573	99.6558
1980	44.58	9.62571	19.6073	29.7085	39.6588	49.6135	59.6378	69.8031	79.6647	89.7593	99.5571
1981	44.6	9.67654	19.515	29.7482	39.6941	49.6941	59.5793	69.7142	79.6073	89.6196	99.6824
1982	44.62	9.55395	19.5699	29.7704	39.6912	49.8165	59.6196	69.7454	79.5762	89.7341	99.7085
1983	44.64	9.58559	19.5856	29.7114	39.7056	49.7649	59.6528	69.7341	79.6104	89.6528	99.6227
1984	44.66	9.57302	19.5379	29.7676	39.7257	49.7257	59.5981	69.6677	79.6196	89.6999	99.6378
1985	44.68	9.56033	19.5762	29.7922	39.5981	49.6677	59.5571	69.7285	79.5762	89.5825	99.6042
1986	44.7	9.59183	19.5183	29.7786	39.6104	49.7285	59.6439	69.5443	79.5981	89.6647	99.6227
1987	44.72	9.59183	19.5539	29.6999	39.7228	49.7313	59.6348	69.6999	79.5539	89.5603	99.6469
1988	44.74	9.63178	19.4751	29.7621	39.6853	49.795	59.7257	69.6318	79.6439	89.5051	99.6558
1989	44.76	9.66474	19.6528	29.737	39.6408	49.7454	59.7085	69.6348	79.6196	89.7142	99.7285
1990	44.78	9.64085	19.6135	29.8297	39.6824	49.8165	59.6257	69.72	79.5635	89.6824	99.7142
1991	44.8	9.61961	19.5981	29.7922	39.6318	49.6941	59.6439	69.6707	79.7621	89.6499	99.5825
1992	44.82	9.53787	19.5183	29.7257	39.6558	49.6558	59.4235	69.6824	79.6677	89.7027	99.5667
1993	44.84	9.72849	19.5475	29.8057	39.7114	49.7056	59.7142	69.6588	79.6677	89.6528	99.5346
1994	44.86	9.51504	19.5443	29.7285	39.8403	49.6287	59.7454	69.6883	79.6318	89.7538	99.6588
1995	44.88	9.72565	19.7114	29.8376	39.8004	49.7731	59.5981	69.7538	79.7027	89.7142	99.5918
1996	44.9	9.64986	19.7313	29.8507	39.7056	49.8637	59.5507	69.6408	79.6257	89.6439	99.6378
1997	44.92	9.67654	19.5887	29.8455	39.7142	49.7482	59.6104	69.7142	79.6165	89.6999	99.7114
1998	44.94	9.57617	19.6647	29.8455	39.6439	49.697	59.7114	69.7482	79.5411	89.7538	99.5699
1999	44.96	9.61348	19.6104	29.8403	39.7228	49.8138	59.6318	69.6104	79.5887	89.7085	99.5667
[truncated: 2,252 more rows]

## Sheet: Figure3
	WT	D_CaO	D_MgO	D_Al2O3	D_Fe2O3	D_SiO2	D_TiO2
S937	22	-42.8701	48.8325	738.682	661.523	561.148	715.094
S914	23	-23.1459	125.926	189.544	226.56	202.468	303.401
S950	37	-36.0392	135.2	404.954	444.974	350.528	400.565
S910	39	-29.2736	99.7934	526.743	616.408	398.547	883.53
S938	58	-22.9976	146.381	269.725	264.673	264.349	535.789
S907	72	-13.636	121.765	306.329	498.38	186.889	366.216
S666	88	-20.5854	164.164	516.709	722.843	376.524	729.167
S917	104	-13.5785	36.8318	270.715	368.4	153.602	333.75
S333	133	-9.67687	100.873	141.792	473.517	114.137	167.01
S999	161	-8.26443	92.2185	300.676	525.862	251.423	NA

## Sheet: Figure4
	WT	AC	CIA	Lc
S937	22	0.100239	8.93947	0.384479
S914	23	0.0622614	5.7736	0.211708
S950	37	0.0888971	8.01416	0.303412
S910	39	0.0597045	5.56179	0.227567
S938	58	0.0501758	4.73321	0.177239
S907	72	0.0238352	2.31913	0.102471
S666	88	0.0357873	3.43387	0.135451
S917	104	0.0306936	2.96196	0.1066
S333	133	0.0166332	1.63083	0.0752722
S999	161	0.0110107	1.08635	0.0533675

## Sheet: Figure5
	WT	W	I_mob
S937	22	26.3556	0.417883
S914	23	45.0583	0.221718
S950	37	34.801	0.349386
S910	39	37.3831	0.284341
S938	58	40.3569	0.223834
S907	72	36.296	0.133774
S666	88	33.1824	0.201373
S917	104	33.3149	0.132643
S333	133	44.696	0.0951939
S999	161	40.0846	0.0808744
